# Supplementary material for: A new stratified risk assessment tool for whiplash injuries developed from a prospective observational study
Source: PubMed Central journal article supplement — BMJ Open. 2013 Jan 30;3(1):e002050. doi: 10.1136/bmjopen-2012-002050 (PMC3563124; doi:10.1136/bmjopen-2012-002050), 2013-01-30
Supplement: bmjopen-2012-002050.draft_revisions.pdf [file bmjopen-2012-002050.draft_revisions.pdf]

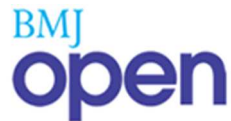

## A new stratified risk assessment tool for whiplash injuries predicts recovery

|                                                                                                                                                                                                      |                                                                                                                                                                                                                                                                                                                                                                                                                                        |
|------------------------------------------------------------------------------------------------------------------------------------------------------------------------------------------------------|----------------------------------------------------------------------------------------------------------------------------------------------------------------------------------------------------------------------------------------------------------------------------------------------------------------------------------------------------------------------------------------------------------------------------------------|
| Journal:                                                                                                                                                                                             | <i>BMJ Open</i>                                                                                                                                                                                                                                                                                                                                                                                                                        |
| Manuscript ID:                                                                                                                                                                                       | bmjopen-2012-002050                                                                                                                                                                                                                                                                                                                                                                                                                    |
| Article Type:                                                                                                                                                                                        | Research                                                                                                                                                                                                                                                                                                                                                                                                                               |
| Date Submitted by the Author:                                                                                                                                                                        | 17-Sep-2012                                                                                                                                                                                                                                                                                                                                                                                                                            |
| Complete List of Authors:                                                                                                                                                                            | Kasch, Helge; Danish Pain Research Centre, Dept of Neurology Kongsted, Alice; Nordic Institute of Chiropractic and Clinical Biomechanics Qerama, Erisela; Aarhus University Hospital, Dept of Neurophysiology Bach, Flemming; Aarhus University Hospital, Aalborg Sygehus, Neurology Bendix, Tom; Copenhagen Spine Center, Glostrup Hospital, Dept. of Rheumatology Jensen, Troels; The Danish Pain Research Center, Dept of Neurology |
| <b>Primary Subject Heading</b>:                                                                                                                                                                      | Evidence based practice                                                                                                                                                                                                                                                                                                                                                                                                                |
| Secondary Subject Heading:                                                                                                                                                                           | Rehabilitation medicine, Diagnostics, Neurology, Legal and forensic medicine                                                                                                                                                                                                                                                                                                                                                           |
| Keywords:                                                                                                                                                                                            | Neurological pain < NEUROLOGY, TRAUMA MANAGEMENT, Trauma management < ORTHOPAEDIC & TRAUMA SURGERY, ACCIDENT & EMERGENCY MEDICINE                                                                                                                                                                                                                                                                                                      |
| <p>Note: The following files were submitted by the author for peer review, but cannot be converted to PDF. You must view these files (e.g. movies) online.</p> <p>References BMJ OPEN format.odt</p> |                                                                                                                                                                                                                                                                                                                                                                                                                                        |

SCHOLARONE™  
Manuscripts

*Stratification method for whiplash injuries*

Heading at BMJ

---

A new stratified risk assessment tool for whiplash injuries predicts recovery

---

**Helge Kasch, MD, PhD Senior Consultant Neurologist<sup>1)</sup>; Alice Kongsted, DC, PhD Senior Research fellow<sup>2)</sup>; Erisela Qerama, MD PhD, Consultant Neurophysiologist<sup>3)</sup>; Flemming W. Bach, MD DMSc, Clinical Professor of Neurology<sup>4)</sup>; Tom Bendix, MD DMSc, Clinical Professor of Rheumatology<sup>5)</sup>; Troels Staehelin Jensen MD DMSc, Clinical Professor of Neurology<sup>1)</sup>**

- 1) The Danish Pain Research Center, Dept. of Neurology, Aarhus University Hospital, Noerrebrogade 44; DK-8000 Aarhus, Denmark**
- 2) Nordic Institute of Chiropractic and Clinical Biomechanics part of Clinical Locomotion Network, University of Southern Denmark, Odense, Denmark**
- 3) Dept. of Neurophysiology, Aarhus University Hospital, Noerrebrogade 44; DK-8000 Aarhus, Denmark**
- 4) Dept. of Neurology, Aarhus University Hospital, Aalborg Hospital, Ladegaardsgade 5 DK-9100 Aalborg, Denmark**

*Page 1*

*Stratification method for whiplash injuries*

5) Copenhagen Spine Center, Glostrup Hospital, Ndr. Ringvej 57,  
2600-DK, Glostrup, Denmark

Contact: Helge Kasch, Senior Consultant Neurologist, PhD. The  
Headache Clinic and Danish Pain Research Center, Dept. of Neurology,  
Aarhus University Hospital, Noerrebrogade 44, DK-8000 Aarhus  
DENMARK. Email: [helge.kasch@dadlnet.dk](mailto:helge.kasch@dadlnet.dk), Tel.: + 45 8949 3333; Fax:  
+45 8949 3300

*Key Words*

Whiplash Injuries, Prognosis, Neck Pain, Headache, Range-of-Motion,  
Risk Factors

*Stratification method for whiplash injuries*

Number of figures: 5 + 1 supplemental figure S1

Number of tables: 1

Number of words count: 3038 (incl. acknowledgements)

Correspondence to

**Dr. Helge Kasch, Dept. of Neurology, Aarhus University Hospital,**

**Noerrebrogade 44, DK-8000 Aarhus, Denmark. Email**

**[helge.kasch@dadlnet.dk](mailto:helge.kasch@dadlnet.dk)**

**Fax: 0045 89493300**

*Page 3*

## *Stratification method for whiplash injuries*

*Abstract:*

### *Objectives*

*This paper presents an initial stratification of acute whiplash patients into 7 risk-strata in relation to a 1-year outcome.*

### *Design*

*The design applied was an observational prospective study of risk factors embedded in a randomized controlled study.*

### *Setting*

*Acute whiplash patients from the units and general practitioners in 4 Danish counties were referred to two research centers.*

### *Participants*

*During a 2-year inclusion period, acute consecutive whiplash-injured (age 18-70 y, rear- or frontal-end MVA, WAD grades I-III symptoms within 72 h, examination prior to 10 days post-injury, capable of written/spoken Danish, without: other injuries/fractures, pre-existing significant somatic/psychiatric disorder, drug/alcohol abuse, and previous significant pain/headache). Six-hundred and eighty-eight (438 F, 250 M) participants were interviewed and examined after 5 days, 544 completed after 1 year.*

*Page 4*

### *Stratification method for whiplash injuries*

*A risk score which included items of initial neck-pain/headache intensity, number-of non-painful complaints, and active neck mobility was applied.*

*One-year primary outcome parameter was work disability, and secondary were: number of sick-listing days, severe headache, neck-pain, neck disability.*

### *Results*

*Risk score and number of sick-listing days were related ( $p < 0.0001$ ). In stratum 1 less than four percent, but in stratum 7 sixty-eight percent were work disabled after 1 year. Bio-psychosocial factors were significantly segregated from the first assessment by risk strata, neck and jaw muscle soreness (Kruskal-Wallis,  $p < 0.0001$ ), pressure algometry ( $p < 0.0001$ ), McGill pain questionnaire parameters ( $p < 0.0001$ ), impact of event ( $p < 0.0006$ ), and early work assessment ( $p < 0.0001$ ).*

### *Conclusion*

*Application of the risk assessment score and use of the risk strata system should be considered a valuable tool to assess return to work following injuries and may be fruitfully applied in future studies. Bio-psycho-social measures are also segregated with the risk assessment score.*

## Stratification method for whiplash injuries

### ARTICLE SUMMARY

---

#### Article focus:

---

- The present Gold Standard for assessment and grading of acute whiplash patients into WAD (whiplash associated disorders) grade 0-IV has been disappointing in discriminating those who will not recover from those who will at an early time-point after injury.
- In a previous prospective study we identified following important risk factors: reduced active neck mobility, intense neck pain/headache, high number-of-neurological complaints. These risk factors were included in a risk score, stratifying acute whiplash patients into 7 risk strata.

### *Stratification method for whiplash injuries*

- The risk score was applied in a new population in a multicenter RCT study of 740 acute whiplash patients examined within less than 1 week and with 1-year follow-up.

---

### Keymessages

---

- The Risk Assessment Score provides inexpensive and fast information on risk for long-term non-recovery after acute whiplash injury with assessment early after injury.
- In stratum 1 less than 4% were disabled after 1 year and in stratum 7 68 % previously healthy persons were more or less out of work.
- The Risk Assessment Score is handling biological, psychological and social factors and may be considered a valuable alternative to the present WAD grading system in predicting work disability and chronic pain.

---

### Strengths

---

- The study represents to our knowledge the largest prospective clinical study on acute whiplash patients (N=740), seeing patients from very early after injury (median time for first visit 4.5 days after injury).



### *Stratification method for whiplash injuries*

- Risk factors were obtained from a previous explorative prospective study on acute whiplash and acute ankle-injured controls.
- Risk factors should be applied in other countries and population of whiplash injured to further validate/confirm

---

### Limitations

---

- The study was at the same time not only observational but embedded in a randomized controlled study in which patients with risk-assessment score of 4+ received early ( 1) immobilization semi-rigid neck collar, 2) verbal advice to stay active, 3) mobilization with McKenzie physiotherapy) and low risk patients received either (2) verbal advice to stay active or a booklet with stay active message). Treatment did however not affect main outcome, 1-year work disability or secondary outcomes: neck disability, long-term neckpain/headache.

## *Stratification method for whiplash injuries*

### *Introduction*

Chronic pain represents a major problem in the Western World with approximately 20% of the adult population suffering more or less from chronic pain. Our ability to deal with these chronic pain conditions is insufficient as it is in various other areas, such as traumatic injuries and pain following surgery or other medical procedures. Identifying patients at risk of developing chronic pain is a prerequisite for establishment of prophylactic initiatives.

When discussing pain following surgery, it has been demonstrated that prior pain intensity, the duration of pain, the type of surgery, the nerve damage during surgery as well as psychological factors, information and the setting and the genetic endowment are of significant importance with respect to the future development and persistence of chronic pain<sup>1-5</sup>. Also regarding musculoskeletal pain conditions, such as headache<sup>6</sup>, cervical sprains<sup>7</sup>, and low back pain conditions,<sup>8</sup> there is an interest in exploring the potential risk factors aligned with persistent pain. The specific type of distortion of the cervical spine, stemming from a so-called *whiplash injury*, in which the neck

### *Stratification method for whiplash injuries*

1  
2  
3 spine is exposed to a forced extension-flexion trauma, is often followed by a  
4  
5 late pain state known as whiplash-associated disorders (WAD).<sup>9 10</sup>  
6  
7

8 These injuries may be associated with a reduction of the pain threshold to  
9  
10 mechanical pressure in the neck muscles<sup>11 12</sup>, a reduction of nociceptive  
11  
12 flexion reflexes,<sup>13</sup> and an expansion of cutaneously referred pain symptoms  
13  
14 following infusion of hypertonic saline into muscles both at the injury site and  
15  
16 in areas remote from the injury site.<sup>14</sup> These findings suggest generalized  
17  
18 hyper- excitability following a whiplash injury which resolves in patients  
19  
20 recovering after injury but persists in patients with ongoing symptoms<sup>2 11 15-17</sup>  
21  
22 Whiplash-associated disorders fall into the categories O-IV according to the  
23  
24 Quebec WAD grading<sup>9</sup>.  
25  
26  
27  
28  
29  
30  
31  
32  
33

34 The Quebec WAD grading represented a first attempt to better characterize  
35  
36 and identify long-term consequences after a whiplash injury. However,  
37  
38 subsequent studies demonstrated that the Quebec WAD grading was of little  
39  
40 value in predicting long-term sequelae.<sup>9 18</sup> In a previous observation study we  
41  
42 found that neck pain, headache, the number of non-painful symptoms, and  
43  
44 reduced neck mobility to be associated with risk of reduced recovery<sup>19</sup>. Also,  
45  
46 in accordance with other studies, emotional distress and social factors  
47  
48  
49  
50  
51

52 *Page 10*  
53  
54  
55  
56  
57  
58  
59  
60

### *Stratification method for whiplash injuries*

1  
2  
3 implicated a risk of reduced recovery<sup>20</sup>. Other studies have demonstrated that  
4  
5 PTSD (post-traumatic stress disorder),<sup>15 20</sup> catastrophizing,<sup>21</sup> kinesiophobia  
6  
7  
8<sup>22-24</sup>, stress-response<sup>25</sup> are additional factors associated with the risk of  
9  
10 persistent complaints.  
11  
12  
13  
14  
15

16 Based on these observations, a prospective study was designed to test  
17  
18 specifically if the factors neck pain, headache, the number of non-painful  
19  
20 symptoms, and reduced neck mobility could be used to establish a stratified  
21  
22 risk assessment scoring system for predicting chronicity or long-term  
23  
24 sequelae.  
25  
26  
27  
28  
29  
30  
31  
32  
33  
34  
35  
36  
37  
38  
39  
40  
41  
42  
43  
44  
45  
46  
47  
48  
49  
50  
51

## *Stratification method for whiplash injuries*

### *Materials and methods*

#### Study population

The investigation was conducted as part of a two-center interventional study of patients exposed to a forced extension flexion strain of the cervical spine, carried out at The Danish Pain Research Centre, Department of Neurology, Aarhus University Hospital, and The Danish Back Research Centre, The Odense University Hospital (University of Southern Denmark). The design was a prospective parallel group trial consisting of three parallel groups. The treatment options were immobilization (semi-rigid neck collar), active mobilization (McKenzie technique) or an oral recommendation to act as usual.<sup>26</sup> In the group of low-risk patients a randomized testing design was applied involving either oral stay-active advice or written advice with the same content in a booklet presented to the subject<sup>27</sup>. Collaboration with the emergency units and general practitioners located in the four counties, (the former counties of Vejle, Funen, Aarhus, and Viborg) representing approximately 1.7 million inhabitants, referred acute whiplash patients to the study. Study enrolment took place between May 2001 and June 2003.

### *Stratification method for whiplash injuries*

Inclusion criteria were the following:

- age 18-70 years
- exposure to a rear- or frontal-end car accident
- development of whiplash related symptoms within 3 days post-injury (WAD grades I-III<sup>9</sup>) and
- an examination to have been performed prior to 10 days after injury.

Exclusion criteria were the following:

- inability of injured individuals to follow written and spoken Danish
- injuries with fractures or dislocations (WAD grade IV)
- additional trauma other than whiplash
- pre-existing significant somatic or psychiatric disease
- known active alcohol abuse.
- known active drug abuse
- and significant headache or neck pain.

Significant past pain conditions were in detail:

- disability pension due to headache

*Page 13*

### *Stratification method for whiplash injuries*

- neck pain
- shoulder pain or low back pain
- sick leave of more than 3 months past year due to neck pain
- headache, low back pain or shoulder-pain condition
- regularly prescribed analgesic medication or other regularly performed interventional treatment for chronic pain condition.

In addition, patients with neck pain or headache of at least 3 on a pain scale from 0 to 10 were excluded.

The study was approved by the local ethical committees (The Scientific Committee for The Counties of Vejle and Funen, Project number 20000268) and conducted in accordance with the Helsinki II Declaration. Each participant, who accepted to be contacted when being examined in the emergency unit or by the general practitioner, received both verbal and written information about the study by the study nurse before giving oral and written consent to participation.

### *Stratification method for whiplash injuries*

Determination of risk status

An initial evaluation took place after a median of 5 days after injury and was performed by a research nurse. Potential risk factors were combined into a total risk assessment score<sup>28</sup> for each individual patient after being examined at The Headache Clinic and Danish Pain Research Centre.

The scoring was as follows:

Active neck mobility, total CROM, which included the following six movements: flexion, extension, right and left lateral-flexion, and right and left rotation<sup>29</sup> (range below 200 = 10 points; 200-220 = 8 points; 221-240 = 6 points; 241-260 = 4 points; 261-280 = 2 points; above 280 = 0 points).

Neck pain and headache were scored on an eleven-box Numeric Rating Scale, using the following score: 0-2 = 0 points; 3-4 = 1 point; 5-8 = 4 points, 9-10 = 6 points. On this scale 0 equaled no pain and 10 equaled the worst imaginable pain.

*Page 15*



### *Stratification method for whiplash injuries*

Number-of non-painful complaints (0-2 = 0 points; 3-5 = 1 point; 6-11 = 3 points), where the minimum was no non-painful complaints and the maximum was 11 of 11 possible, pre-identified non-painful complaints (paresthesia, dizziness, vision disturbances, tinnitus, hyperacusis, globulus, fatigue, irritation, concentration disturbances, memory difficulties, sleep disturbances).

The factors included in the risk score were based on earlier studies<sup>19 28 30</sup>.

Fig. S1 (see appendix) shows the ROC curves to determine the sensitivity for the measures: active neck mobility, headache/neck pain and number of non-painful symptoms.

#### Follow-up assessments

Questionnaires were filled in at the baseline and after 3, 6, and 12 months after the injury by all participants. The intensity and frequency of headaches, neck pain, and each of the non-painful symptoms were recorded in McGill pain questionnaires and the Impact of Event Questionnaires at each time point. In addition, patients' reporting of previous symptoms, disease,

### *Stratification method for whiplash injuries*

1  
2  
3 medication, and socio-demographic and injury-related factors were obtained  
4  
5 at the baseline of the study.  
6  
7  
8  
9  
10

#### Clinical assessment

11  
12  
13  
14 At the first examination patients underwent a brief physical examination by  
15  
16 the study nurse. Active neck mobility (flexion, extension, left and right rotation  
17  
18 and lateral-flexion) was assessed with a CROM device as formerly described.  
19  
20  
21  
22<sup>29 31</sup>. During neck movement in all six directions the examiner asked the  
23  
24 patient whether pain was elicited by the particular movement, and if so,  
25  
26 whether pain was localized in the neck area or appeared in a region remote  
27  
28 from the neck. Methodical palpation was performed bilaterally at nine sites: 1)  
29  
30 the anterior part of the temporal muscle, 2) the posterior part of the temporal  
31  
32 muscle, 3) the masseter muscle, 4) the lateral pterygoid muscle, 5) the  
33  
34 sternocleid at the mastoid insertion point, 6) the sternocleid at its middle belly,  
35  
36  
37  
38  
39  
40  
41  
42  
43  
44  
45  
46  
47  
48  
49  
50  
51  
52  
53  
54  
55  
56  
57  
58  
59  
60  
7) the suboccipital muscle group, 8) the superior trapezius muscle, and 9) the  
rhomboid muscle along the medial border of the scapula. At each palpation  
site a pain score (0-4) was obtained<sup>32</sup> with:

- 0 equaling neither pain nor reported tenderness,

### *Stratification method for whiplash injuries*

- 1 equaling complaints of mild pain but no facial contortion (grimace), flinch or withdrawal,
- 2 equaling a moderate pain and degree of facial contortion (grimace) or flinch,
- 3 equaling a severe pain and marked flinch or withdrawal, and
- 4 equaling unbearable pain and withdrawal without palpation.

The primary outcome measure

The primary outcome variable selected a priori was handicap, which was defined as: a) sick leave > 3 months during the last 6 months; b) work inability during the entire last month; or c) not working anymore because of the accident.<sup>19</sup> The number of days on sick leave was computed by means of a completed diary (a patient log) and questionnaire data after 3, 6, and 12 months post-injury. Days with sick leave counted as full days and days with reduced working hours counted as half days of sick leave. If the patient could manage a full-time job but had changed functions after injury, it counted as full working hours. Patients who did not work prior to the injury (on leave, unemployed, disability pension, retired) were not considered in the calculated

*Page 18*

### *Stratification method for whiplash injuries*

1  
2  
3 risk of handicap but were included in computation of the secondary outcome  
4  
5 measures.  
6

7  
8  
9 The secondary outcome measures

10  
11 After 12 months neck pain and headache were rated on an 11-point NRS  
12  
13 scale (0 = no pain, 10 = the worst imaginable pain). Pain scores from 0-4  
14  
15 were considered as “minimal pain” 5-10 “considerable pain”.<sup>33</sup>  
16  
17

18  
19  
20  
21  
22 The neck condition after twelve months was assessed by means of the  
23  
24 Copenhagen Neck Disability Scale<sup>34</sup>, where scores from 0-6 were defined as  
25  
26 “minimal neck disability” and from 7-30 “considerable neck disability”.  
27  
28  
29

30  
31  
32  
33 Statistical analysis

34  
35  
36 Data Analysis was made with Stata 12.0™ (StataCorp, Texas US) and  
37  
38 Microsoft Excel 2010 for Windows™. Investigators remained blind-folded,  
39  
40 until the analysis of the treatment effect had been done. Non-parametric  
41  
42 statistics were applied for evaluating risk strata. Parametric data with normal  
43  
44 distribution or log normal distribution was presented within each risk stratum  
45  
46  
47 graphs as mean ± sem values.  
48  
49

50  
51 *Page 19*  
52  
53  
54  
55  
56  
57  
58  
59  
60

*Stratification method for whiplash injuries*

1  
2  
3  
4  
5  
6  
7  
8  
9  
10  
11  
12  
13  
14  
15  
16  
17  
18  
19  
20  
21  
22  
23  
24  
25  
26  
27  
28  
29  
30  
31  
32  
33  
34  
35  
36  
37  
38  
39  
40  
41  
42  
43  
44  
45  
46  
47  
48  
49  
50  
51  
52  
53  
54  
55  
56  
57  
58  
59  
60

For peer review only

## *Stratification method for whiplash injuries*

### *Results*

1  
2  
3  
4  
5  
6  
7  
8  
9  
10  
11  
12  
13  
14  
15  
16  
17  
18  
19  
20  
21  
22  
23  
24  
25  
26  
27  
28  
29  
30  
31  
32  
33  
34  
35  
36  
37  
38  
39  
40  
41  
42  
43  
44  
45  
46  
47  
48  
49  
50  
51  
52  
53  
54  
55  
56  
57  
58  
59  
60

Details of the study population has been described previously, a flow chart is presented in figure 1.<sup>30</sup> Briefly, a total of 1495 [F/M: 898/597] acute whiplash patients were contacted after being examined at the emergency units or by their general practitioners. Six hundred and eighty-eight eligible acute whiplash patients [F/M: 443/252] gave informed written and verbal consent to participate.

Two-hundred [F/M: 102/98] patients refused to participate. Five hundred and forty patients were ineligible, fifteen were excluded due to protocol violation. Fifty-two patients otherwise fulfilling inclusion/exclusion criteria but with a former moderate neck pain (VAS < 4) were also excluded. (Results from these patients will be reported elsewhere). Whiplash injuries were used to divide patients into high-risk groups and low-risk groups and recruitment for an intervention study. The patients were not informed about the risk group assignment. A detailed account of this classification system and the result of the intervention was made elsewhere.<sup>25 26</sup> Briefly, neither 1) mobilization nor 2) immobilization treatment was superior to a 3) stay-active message given

*Page 21*

### *Stratification method for whiplash injuries*

1  
2  
3 by the study nurse in the case of high-risk patients. A stay-active message  
4  
5 was equally effective if given verbally by the study nurse or by a booklet in the  
6  
7 low-risk patients.<sup>27</sup>  
8  
9

10  
11  
12  
13 Fig. 2a shows a log-linear relationship between the risk assessment score  
14  
15 and the number of days being sick for acute whiplash patients.  
16  
17

18  
19  
20  
21 Fig. 2b shows distribution in the risk strata after one year of patients a)  
22  
23 returning to work or b) have reduced functional capacity in full-time jobs or c)  
24  
25 being work disabled. Whereas 96% had returned to work in stratum 1, only  
26  
27 32% of previous healthy whiplash-exposed in stratum 7 were back to work  
28  
29 after 1 year (Kruskal-Wallis,  $p < 0.0001$ ).  
30  
31  
32  
33

34  
35  
36  
37 In figures 3a-c the ability to perform work within 6 weeks and the ability to  
38  
39 return to work within 6 weeks and the assessment of the physical job  
40  
41 demands of their present/recent were rated after 5 median days on an NRS-  
42  
43 11-point box scale. Job-related issues were increasingly severe the higher  
44  
45 risk stratum of the patient (Kruskal-Wallis,  $p < 0.0001$ ).  
46  
47  
48  
49

50  
51  
52 *Page 22*  
53  
54  
55  
56  
57  
58  
59  
60

### *Stratification method for whiplash injuries*

1  
2  
3 The components of the impact of event scale in fig. 4 intrusion and avoidance  
4  
5 and the total IES score were bar-graphed for each stratum. There was an  
6  
7 increase in reported injury-related emotional distress in the risk strata  
8  
9 (Kruskall Wallis,  $p < 0.0001$ ).  
10  
11

12  
13  
14  
15  
16 Figures 5 a-e display the bar graphs of strata representing pressure  
17  
18 algometry for both pain detection and pain tolerance thresholds for the  
19  
20 muscles in the neck region: the masseter and the infraspinatus muscles and  
21  
22 at a remote control site at the left 3rd finger joint. All these psycho-physical  
23  
24 measures are differently distributed in the risk strata (Kruskal Wallis,  $p <$   
25  
26  $0.0001$ ).  
27  
28  
29  
30  
31  
32  
33  
34  
35  
36  
37  
38  
39  
40  
41  
42  
43  
44  
45  
46  
47  
48  
49  
50



## *Stratification method for whiplash injuries*

### *Discussion*

This study shows that an early classification of patients into risk strata based on biological and certain psycho-social functions predicts non-recovery. In order to group patients into 7 different strata we used a scaling system resulting from observational findings from a former study. This system included four predefined categories: neck pain intensity, headache intensity, the number of non-painful symptoms and reduced neck mobility. The strata set in the present study was applied in clinical procedures undertaken at a time point where chronic symptoms could not have developed i.e. < median 5 days after injury. The scoring on neck mobility and non-painful symptoms was based on previous observations where a control group was included.<sup>19</sup> The summation score was arbitrarily determined, and it may be argued that if another scoring had been used, other findings might have been ascertained. Nevertheless, the scoring derived from the findings from a prospective observational study of acute whiplash patients (WAD I-III) with an ankle-injured control group in which active neck mobility was the most significant predictor for work disability. Neck pain / headache intensity as well as a high number of non-painful complaints were also predictive, however, to a lesser extent<sup>19</sup> as reflected in the supplemental ROC curves in fig S1. In the present

*Page 24*

### *Stratification method for whiplash injuries*

1  
2  
3 work and in our previous studies<sup>19</sup> we used return-to-work and number-of  
4  
5 days parameters with sick leaves of 1 year as indicators of work disability.  
6  
7  
8 The use of sick leave as a parameter of non-recovery has been discussed  
9  
10 previously.<sup>19</sup> It may be argued that sick leaves are not a direct measure of  
11  
12 non-recovery. But as for subjective symptoms such as pain, it is crucial to  
13  
14 select robust and directly quantifiable factors in order to reduce the risk of  
15  
16 investigator bias. Moreover, the fact that all measures were completed shortly  
17  
18 after injury means that patients were in all probability prevented from  
19  
20 changing their habitual, pre-injury health belief, which could have been  
21  
22 affected by various sources, like the mass media, healthcare persons, family,  
23  
24 or friends.<sup>23 35</sup>  
25  
26  
27  
28  
29  
30  
31  
32  
33

34 We cannot exclude that the division of patients into two risk groups, high and  
35  
36 low-risk groups, may have had an impact on the outcome. However, we  
37  
38 believe that this is less likely due to the fact that patients were not informed or  
39  
40 aware of whether they belonged to a high-risk or a low-risk group. We have  
41  
42 previously shown that a prior dichotomous division of the present study  
43  
44 material into a high-risk and a low-risk group based on earlier observations<sup>19</sup>  
45  
46  
47  
48  
49  
50  
51  
52  
53  
54  
55  
56  
57  
58  
59  
60  
<sup>30</sup> could predict non-recovery. We have now augmented this observation by

*Page 25*

### *Stratification method for whiplash injuries*

1  
2  
3 showing that an a priori stratification into 7 strata provides a more detailed  
4  
5 documentation for the risk of long term sequelae. The Risk Assessment  
6  
7 Score is robust for predicting 1-year work disability (ROC curve area 0.87)  
8  
9 and shows a log-linear relationship for number of reported sick-listed days  
10  
11 during the first year after whiplash injury. This is not possible with the existing  
12  
13 WAD grading system.<sup>18</sup> The bio-psycho-social factors, which reflect  
14  
15 biological responses like neck strength, duration of neck movement, the cold-  
16  
17 pressor pain response<sup>28</sup> (and as shown here: pressure pain detection and  
18  
19 tolerance threshold, fear-avoidance and intrusion parameters, as well as  
20  
21 work-related issues) are logically distributed in the risk strata. The present  
22  
23 risk stratification scheme rests on a selected and limited number of symptoms  
24  
25 and signs based on prior observed findings. Legislative and detailed psycho-  
26  
27 social factors were not included in the stratification. Such factors might also  
28  
29 have an impact although the chances are that legislative issues hardly affect  
30  
31 recovery as early as 5 days after injury. There may be other possible factors  
32  
33 that can affect recovery<sup>24</sup>. In the present paper we suggest a way of  
34  
35 stratifying whiplash patients in the acute state in order to improve the  
36  
37 predictive power of prognosis. While the risk strata presented here need to be  
38  
39 tested as prognostic factors in other cohorts in order to validate our findings,  
40  
41  
42  
43  
44  
45  
46  
47  
48  
49  
50  
51

52 *Page 26*

### *Stratification method for whiplash injuries*

1  
2  
3 the present study is one of the largest materials in the literature. Moreover,  
4  
5 the system has not yet been tested in relation to its possible usefulness in  
6  
7  
8 guiding clinical decisions about the choice of treatment. It is a possible  
9  
10  
11 downside to risk assessment, that health-care professionals could make  
12  
13 premature or hasty decisions when faced with a certain patient who scores  
14  
15 high on a prognostic scale like ours. With such scorings health-care  
16  
17 professionals might unconsciously associate the patient's injury with a  
18  
19 prognosis of the chronicity type and act accordingly to some extent.  
20  
21  
22  
23  
24  
25

26 Other studies have found post-traumatic stress,<sup>15</sup> the presence of  
27  
28 sensitization<sup>36</sup> and neck pain and headache intensities to be predictive of  
29  
30 chronic neck disability 1 year after injury.<sup>10 37</sup> These findings are consistent  
31  
32 with the present results.  
33  
34  
35  
36  
37  
38  
39  
40

### Conclusion

41  
42  
43 The risk assessment score is applicable and inexpensive. Early identification  
44  
45 of whiplash-exposed persons at risk is important for planning future treatment  
46  
47  
48  
49  
50

### *Stratification method for whiplash injuries*

1  
2  
3 in scientific studies as well as the individual guidance and management of the  
4  
5 patient.  
6  
7

8  
9  
10 Application of the risk assessment score may be a valuable alternative to the  
11  
12 present WAD grading system in predicting work disability and pain and  
13  
14 certain psychosocial parameters after neck injury. Furthermore, a bio-  
15  
16 psychosocial risk assessment could be applied in other acute conditions  
17  
18 bearing a risk of long-term development of other chronic dysfunctional pain  
19  
20 conditions.  
21  
22  
23  
24  
25  
26  
27  
28  
29

### *Acknowledgements*

30  
31  
32 Participants were recruited with the help of the staff at the emergency units at  
33  
34 hospitals in the 4 former counties of Viborg, Aarhus, Vejle and Funen during  
35  
36 the enrolment period. Statistical consulting was provided from Dept. of  
37  
38 Statistics, University of Southern Denmark on designing the study. Financial  
39  
40 support was provided by an unrestricted grant from The Danish Insurance  
41  
42 Association.  
43  
44  
45  
46  
47  
48  
49  
50

51  
52 *Page 28*  
53  
54  
55  
56  
57  
58  
59  
60

## *Stratification method for whiplash injuries*

Appendix

Legends

Figure 1. Flowchart for the Whiplash study.

Figure 2a. Risk Strata and Number of Sick-listed Days during First Year after Whiplash Injury

Figure 2b. One Year Recovery from Whiplash Injury in Risk Strata

Figure 3a-c. Initial Numeric Rating of Work Related Issues in Risk Strata.

Figure 3 a. Expecting problems managing ones job/education in 6 weeks.

Figure 3b. Likelihood of being back to work/education in 6 weeks

Figure 3c. Evaluation of the physical job requirement of current or most recent job/education

Figure 4. The Impact of Event Scale with subscales of Intrusion and Avoidance shown in risk strata.

Figure 5 a-e. Pressure algometry in the neck and head and remote from injury in risk strata. PPT pressure pain tolerance threshold and PPDT pressure pain detection threshold (kilo Pascal, Mean  $\pm$  SEM).

Figure S1 (supplementary) ROC curve of individual risk factors and the Whiplash Risk Assessment Score.

*Page 29*

## *Stratification method for whiplash injuries*

### **Funding**

Funded by The Danish Insurance Association 1999

### **Data Sharing**

Data are not available in public, but can if necessary be sent to reviewers.

### **Conflict of Interests**

ICMJE forms have been fulfilled and signed by each author

*Stratification method for whiplash injuries***References**

1. Brandsborg B, Dueholm M, Nikolajsen et al. A prospective study of risk factors for pain persisting 4 months after hysterectomy. *Clin J Pain* 2009;25:263-8.
2. Nikolajsen L, Brandsborg B, Lucht U et al. Chronic pain following total hip arthroplasty: a nationwide questionnaire study. *Acta Anaesthesiol Scand* 2006;50:495-500.
3. Aasvang EK, Gmaehle E, Hansen JB et al. Predictive risk factors for persistent postherniotomy pain. *Anesthesiology* 2010;112:957-69.
4. Kehlet H, Jensen TS, Woolf CJ. Persistent postsurgical pain: risk factors and prevention. *Lancet* 2006;367:1618-25.
5. Nikolajsen L, Ilkjaer S, Christensen et al. Pain after amputation. *Br J Anaesth* 1998;81:486.



### *Stratification method for whiplash injuries*

- 1  
2  
3 6. Rasmussen BK. Migraine and tension-type headache in a general  
4  
5 population: precipitating factors, female hormones, sleep pattern and  
6  
7 relation to lifestyle. *Pain* 1993;53:65-72.
- 8  
9  
10  
11 7. Galasko CSB, Murray PM, Pitcher M et al. Neck sprains after road  
12  
13 traffic accidents: a modern epidemic. *Injury* 1993;24:155-57.
- 14  
15  
16  
17 8. Kongsted A, Leboeuf-Yde C. The Nordic back pain subpopulation  
18  
19 program: course patterns established through weekly follow-ups in  
20  
21 patients treated for low back pain. *Chiropr Osteopat* 2010;18:2.
- 22  
23  
24  
25 9. Spitzer WO, Skovron ML, Salmi LR et al. Scientific monograph of the  
26  
27 Quebec Task Force on Whiplash-Associated Disorders: redefining  
28  
29 'Whiplash' and it's management. *Spine* 1995;20:1S-73S.
- 30  
31  
32  
33 10. Williams M, Williamson E, Gates S et al. A systematic literature review  
34  
35 of physical prognostic factors for the development of Late Whiplash  
36  
37 Syndrome. *Spine* 2007;32:E764-80.
- 38  
39  
40  
41 11. Kasch H, Qerama E, Kongsted A et al. Deep muscle pain, tender  
42  
43 points and recovery in acute whiplash patients: a 1-year follow-up study.  
44  
45  
46  
47  
48  
49 *Pain* 2008;140:65-73.

*Stratification method for whiplash injuries*

- 1  
2  
3 12. Kasch H, Stengaard-Pedersen K, Arendt-Nielsen L et al. Pain  
4 thresholds and tenderness in neck and head following acute whiplash  
5 injury: a prospective study. *Cephalalgia* 2001;21:189-97.  
6  
7  
8  
9  
10  
11 13. Sterling M. Differential development of sensory hypersensitivity and a  
12 measure of spinal cord hyperexcitability following whiplash injury. *Pain*  
13 2010;150:501-6.  
14  
15  
16  
17  
18  
19  
20 14. Koelbaek Johansen M, Graven-Nielsen T, Schou-Olesen A et al.  
21 Generalised muscular hyperalgesia in chronic whiplash syndrome. *Pain*  
22 1999;83:229-34.  
23  
24  
25  
26  
27  
28  
29 15. Sterling M, Hendrikz J, Kenardy J. Similar factors predict disability and  
30 posttraumatic stress disorder trajectories after whiplash injury. *Pain*  
31 2011;152:1227-8.  
32  
33  
34  
35  
36  
37  
38 16. Gottrup H, Andersen J, Arendt-Nielsen L et al. Psychophysical  
39 examination in patients with post-mastectomy pain. *Pain* 2000;87:275-84.  
40  
41  
42  
43 17. Aasvang E, Kehlet H. Chronic postoperative pain: the case of inguinal  
44 herniorrhaphy. *Br J Anaesth* 2005;95:69-76.  
45  
46  
47  
48  
49  
50  
51  
52  
53  
54  
55  
56  
57  
58  
59  
60

### *Stratification method for whiplash injuries*

1  
2  
3 18. Kivioja J, Jensen I, Lindgren U. Neither the WAD-classification nor the  
4  
5 Quebec Task Force follow-up regimen seems to be important for the  
6  
7 outcome after a whiplash injury. A prospective study on 186 consecutive  
8  
9 patients. Eur Spine J 2008;17:930-5.  
10  
11

12  
13  
14 19. Kasch H, Bach FW, Jensen TS. Handicap after acute whiplash injury:  
15  
16 a 1-year prospective study of risk factors. Neurology 2001;56:1637-43.  
17  
18

19  
20 20. Carstensen TB, Frostholm L, Oernboel E et al. Post-trauma ratings of  
21  
22 pre-collision pain and psychological distress predict poor outcome  
23  
24 following acute whiplash trauma: a 12-month follow-up study. Pain  
25  
26 2008;139:248-59.  
27  
28

29  
30  
31 21. Rivest K, Cote JN, Dumas JP et al. Relationships between pain  
32  
33 thresholds, catastrophizing and gender in acute whiplash injury. Man Ther  
34  
35 2010;15:154-9.  
36  
37

38  
39  
40 22. Buitenhuis J, Jaspers JP, Fidler V. Can kinesiophobia predict the  
41  
42 duration of neck symptoms in acute whiplash? Clin J Pain 2006;22:272-7.  
43  
44

45  
46 23. Bunketorp L, Lindh M, Carlsson J et al. The perception of pain and  
47  
48 pain-related cognitions in subacute whiplash-associated disorders: its  
49  
50

*Stratification method for whiplash injuries*

1  
2  
3 influence on prolonged disability. Disability and rehabilitation 2006;28:271-  
4  
5 9.

6  
7  
8  
9 24. Pedler A, Sterling M. Assessing Fear-Avoidance Beliefs in Patients  
10  
11 With Whiplash-Associated Disorders: A Comparison of 2 Measures. Clin J  
12  
13 Pain 2011;27:502-7.  
14

15  
16  
17 25. Kongsted A, Bendix T, Qerama E et al. Acute stress response and  
18  
19 recovery after whiplash injuries. A one-year prospective study. Eur J Pain  
20  
21 2008;2:455-63.  
22  
23

24  
25  
26 26. Kongsted A, Qerama E, Kasch H et al. Neck collar, "act-as-usual" or  
27  
28 active mobilization for whiplash injury? A randomized parallel-group trial.  
29  
30 Spine (Phila Pa 1976) 2007;32:618-26.  
31  
32

33  
34  
35 27. Kongsted A, Qerama E, Kasch H et al. Education of patients after  
36  
37 whiplash injury: is oral advice any better than a pamphlet? Spine (Phila Pa  
38  
39 1976) 2008;33:E843-8.  
40  
41

42  
43  
44 28. Kasch H, Qerama E, Kongsted A et al. The Risk Assessment Score in  
45  
46 acute whiplash injury predicts outcome and reflects bio-psycho-social  
47  
48 factors. Spine (Phila Pa 1976) 2011;36(25Suppl):S263-267.  
49  
50

51 *Page 35*  
52  
53  
54  
55  
56  
57  
58  
59  
60

### *Stratification method for whiplash injuries*

1  
2  
3 29. Kasch H, Stengaard-Pedersen K, Arendt-Nielsen L et al. Headache,  
4 neck pain, and neck mobility after acute whiplash injury: a prospective  
5 study. Spine (Phila Pa 1976) 2001;26:1246-51.  
6  
7

8  
9  
10  
11 30. Kasch H, Qerama E, Kongsted A et al. Clinical assessment of  
12 prognostic factors for long-term pain and handicap after whiplash injury: a  
13 1-year prospective study. Eur J Neurol 2008;15:1222-30.  
14  
15  
16

17  
18  
19  
20 31. Rheault W, Albright B, Byers C et al. Intertester reliability of the  
21 cervical range of motion device. JOSPT 1992;15:147-50.  
22  
23

24  
25  
26 32. Wolfe F, Smythe HA, Yunus MB et al. The American College of  
27 Rheumatology 1990 Criteria for the Classification of Fibromyalgia. Report  
28 of the Multicenter Criteria Committee. Arthritis Rheum 1990;33:160-72.  
29  
30  
31

32  
33  
34 33. Collins SL, Moore RA, McQuay HJ. The visual analogue scale: what is  
35 moderate pain in millimetres? Pain 1997;72:95-97.  
36  
37  
38

39  
40  
41 34. Jordan A, Manniche C, Mosdal C et al. The Copenhagen Neck  
42 Functional Disability Scale: a study of reliability and validity. J Manipulative  
43 Physiol Ther 1998;21:520-7.  
44  
45  
46  
47  
48  
49  
50

*Stratification method for whiplash injuries*

1  
2  
3 35. Dworkin RH, Turk DC, Wyrwich KW et al. Interpreting the clinical  
4 importance of treatment outcomes in chronic pain clinical trials: IMMPACT  
5 recommendations. J Pain 2008;9:105-21.  
6  
7

8  
9  
10  
11 36. Sterling M, Carroll LJ, Kasch H, Kamper SJ, Stemper B. Prognosis  
12 after whiplash injury: where to from here? Discussion paper 4. Spine  
13 (Phila Pa 1976) 2011;36(25 Suppl):S330-4.  
14  
15  
16

17  
18  
19  
20 37. Sterling M, Jull G, Kenardy J. Physical and psychological factors  
21 maintain long-term predictive capacity post-whiplash injury. Pain  
22 2006;122:102-8.  
23  
24  
25  
26

27  
28  
29 38. Scholten-Peeters GGM, Verhagen AP, Bekkering GE et al. Prognostic  
30 factors of whiplash-associated disorders: a systematic review of  
31 prospective cohort studies. Pain 2003;104:303-22.  
32  
33  
34  
35  
36  
37  
38  
39  
40  
41  
42  
43  
44  
45  
46  
47  
48  
49  
50  
51

### The Danish Whiplash Study Group Risk Score

| Points                      | 0           | 1   | 2       | 3    | 4       | 5 | 6       | 7 | 8       | 9 | 10   |
|-----------------------------|-------------|-----|---------|------|---------|---|---------|---|---------|---|------|
| CROM                        | >280        |     | 261-280 |      | 241-260 |   | 221-240 |   | 200-220 |   | <200 |
| Neck/Head VAS               | 0-2         | 3-4 |         |      | 5-8     |   | 9-10    |   |         |   |      |
| Number of non-pain symptoms |             | 3-5 |         | 6-11 |         |   |         |   |         |   |      |
| Stratum 1                   | = 0 points  |     |         |      |         |   |         |   |         |   |      |
| Stratum 2                   | = 1-3 pts   |     |         |      |         |   |         |   |         |   |      |
| Stratum 3                   | = 4-6 pts   |     |         |      |         |   |         |   |         |   |      |
| Stratum 4                   | = 7-9 pts   |     |         |      |         |   |         |   |         |   |      |
| Stratum 5                   | = 10-12 pts |     |         |      |         |   |         |   |         |   |      |
| Stratum 6                   | = 13-15 pts |     |         |      |         |   |         |   |         |   |      |
| Stratum 7                   | = 16-19 pts |     |         |      |         |   |         |   |         |   |      |

## BMJ OPEN

---

**Article focus:**

---

- The present Gold Standard for assessment and grading of acute whiplash patients into WAD (whiplash associated disorders) grade 0-IV has been disappointing in discriminating those who will not recover from those who will at an early time-point after injury.
- In a previous prospective study we identified following important risk factors: reduced active neck mobility, intense neck pain/headache, high number-of-neurological complaints. These risk factors were included in a risk score, stratifying acute whiplash patients into 7 risk strata.
- The risk score was applied in a new population in a multicenter RCT study of 740 acute whiplash patients examined within less than 1 week and with 1-year follow-up.

---

**Keymessages**

---

- The Risk Assessment Score provides inexpensive and fast information on risk for long-term non-recovery after acute whiplash injury with assessment early after injury.
- In stratum 1 less than 4% were disabled after 1 year and in stratum 7 68 % previously healthy persons were more or less out of work.



- 1  
2  
3  
4  
5  
6  
7  
8  
9  
10  
11  
12  
13
- The Risk Assessment Score is handling biological, psychological and social factors and may be considered a valuable alternative to the present WAD grading system in predicting work disability and chronic pain.

---

### Strengths

---

- 14  
15  
16  
17  
18  
19  
20  
21  
22  
23  
24  
25  
26  
27  
28  
29  
30  
31  
32  
33  
34  
35  
36
- The study represents to our knowledge the largest prospective clinical study on acute whiplash patients (N=740), seeing patients from very early after injury (median time for first visit 4.5 days after injury).
  - Risk factors were obtained from a previous explorative prospective study on acute whiplash and acute ankle-injured controls.
  - Risk factors should be applied in other countries and population of whiplash injured to further validate/confirm

---

### Limitations

---

- 37  
38  
39  
40  
41  
42  
43  
44  
45  
46  
47  
48  
49  
50  
51  
52  
53  
54  
55  
56  
57  
58  
59  
60
- The study was at the same time not only observational but embedded in a randomized controlled study in which patients with risk-assessment score of 4+ received early ( 1) immobilization semi-rigid neck collar, 2) verbal advice to stay active, 3) mobilization with McKenzie physiotherapy) and low risk patients received either (2) verbal advice to stay active or a booklet with stay active message). Treatment did

1  
2  
3  
4  
5  
6  
7  
8  
9  
10  
11  
12  
13  
14  
15  
16  
17  
18  
19  
20  
21  
22  
23  
24  
25  
26  
27  
28  
29  
30  
31  
32  
33  
34  
35  
36  
37  
38  
39  
40  
41  
42  
43  
44  
45  
46  
47  
48  
49  
50  
51  
52  
53  
54  
55  
56  
57  
58  
59  
60

however not affect main outcome, 1-year work disability or secondary  
outcomes: neck disability, long-term neckpain/headache.

For peer review only

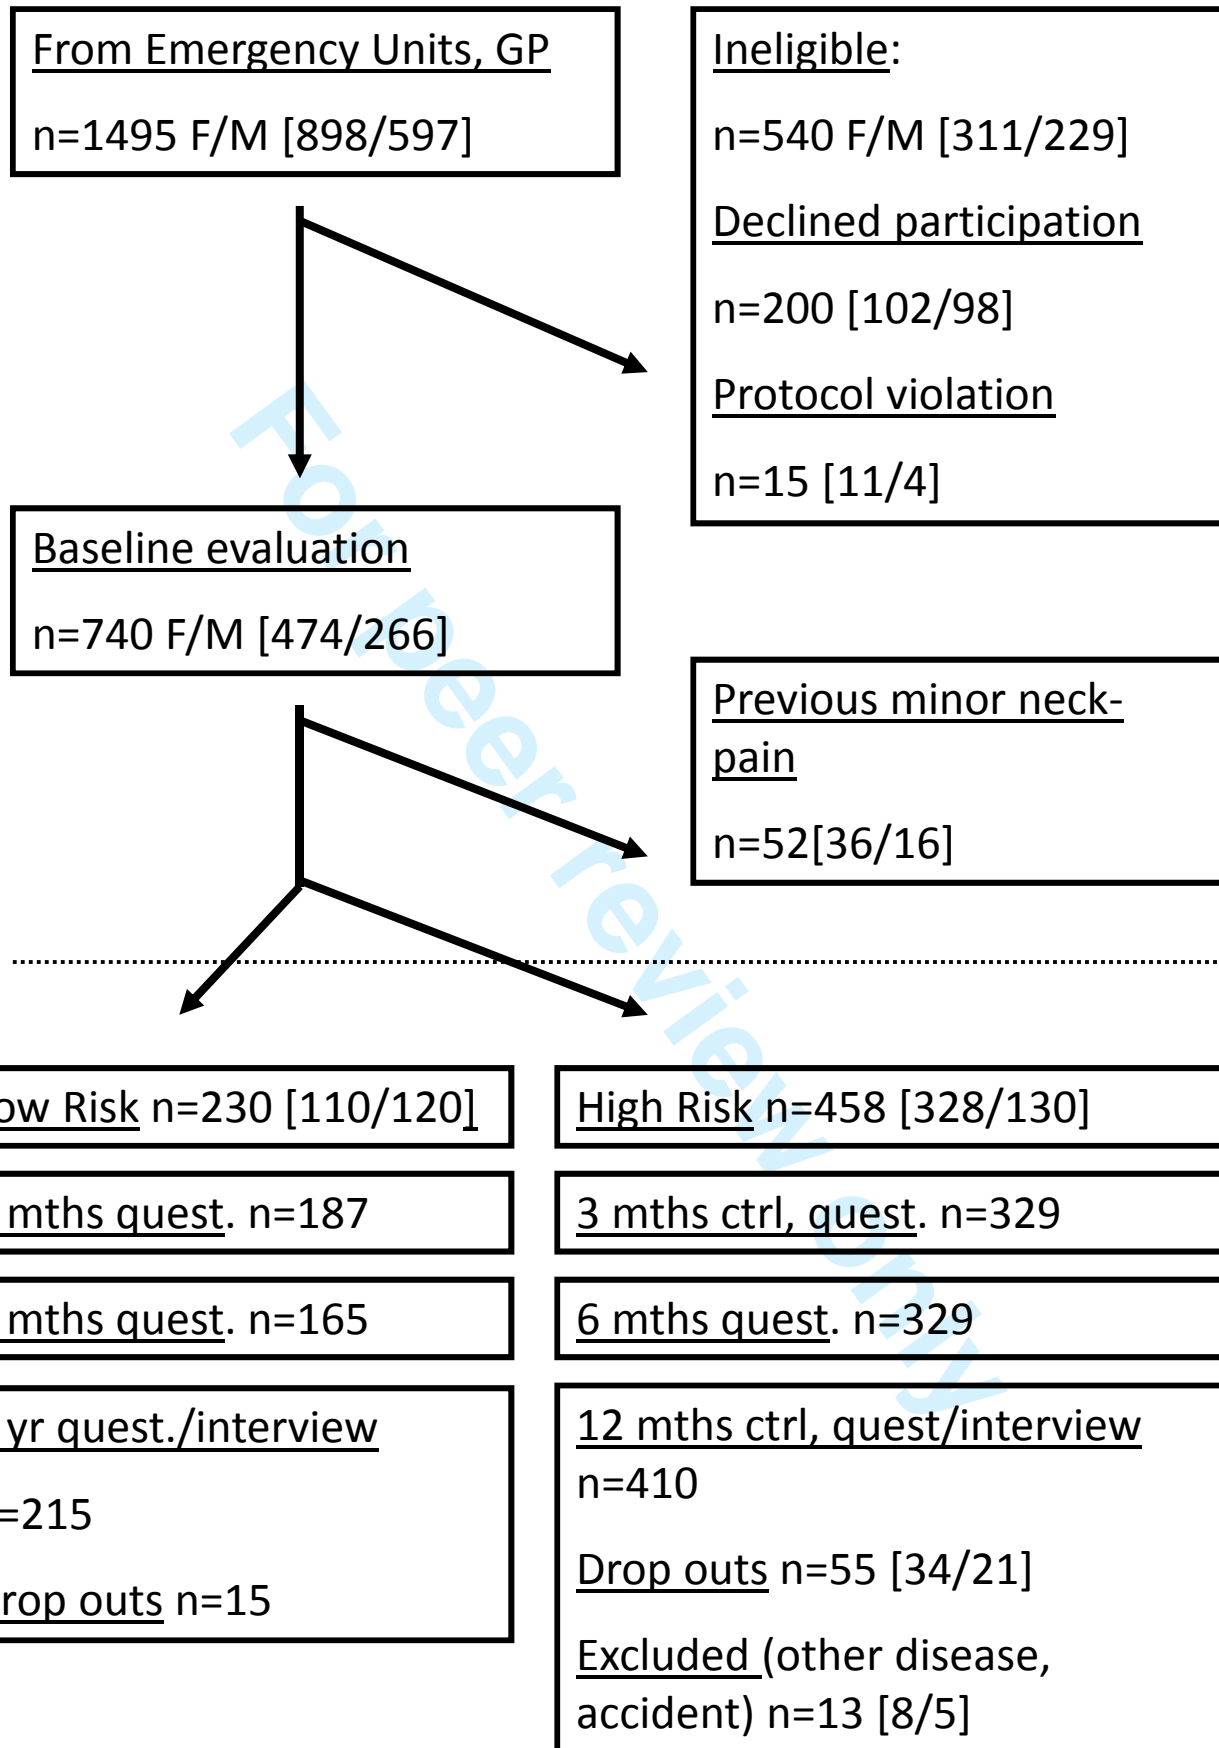

# Stratification and Sick Days during 1st Year

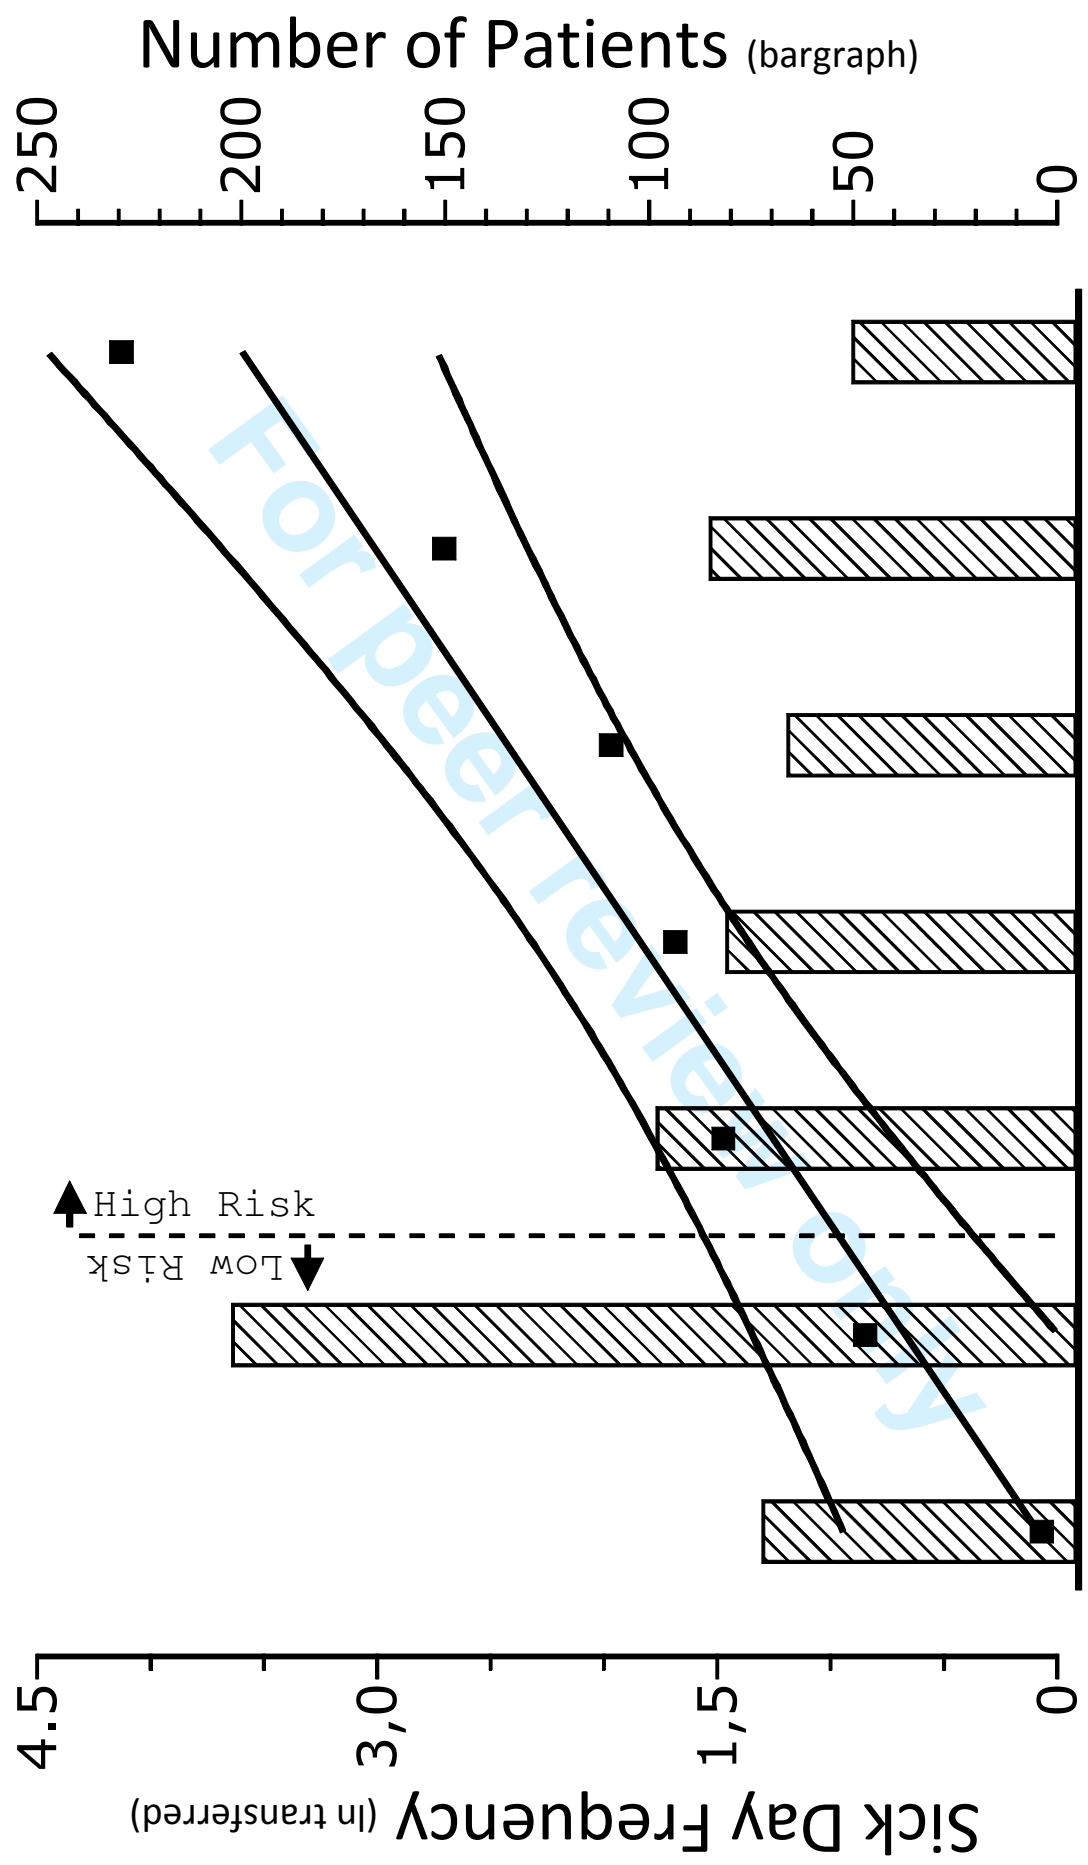

1  
2  
3  
4  
5  
6  
7  
8  
9  
10  
11  
12  
13  
14  
15  
16  
17  
18  
19  
20  
21  
22  
23  
24  
25  
26  
27  
28  
29  
30  
31  
32  
33  
34  
35  
36  
37  
38  
39  
40  
41  
42  
43  
44  
45  
46  
47  
48  
49  
50  
51  
52  
53  
54  
55  
56  
57  
58  
59  
60

# Stratified whiplash patients and 1-year recovery

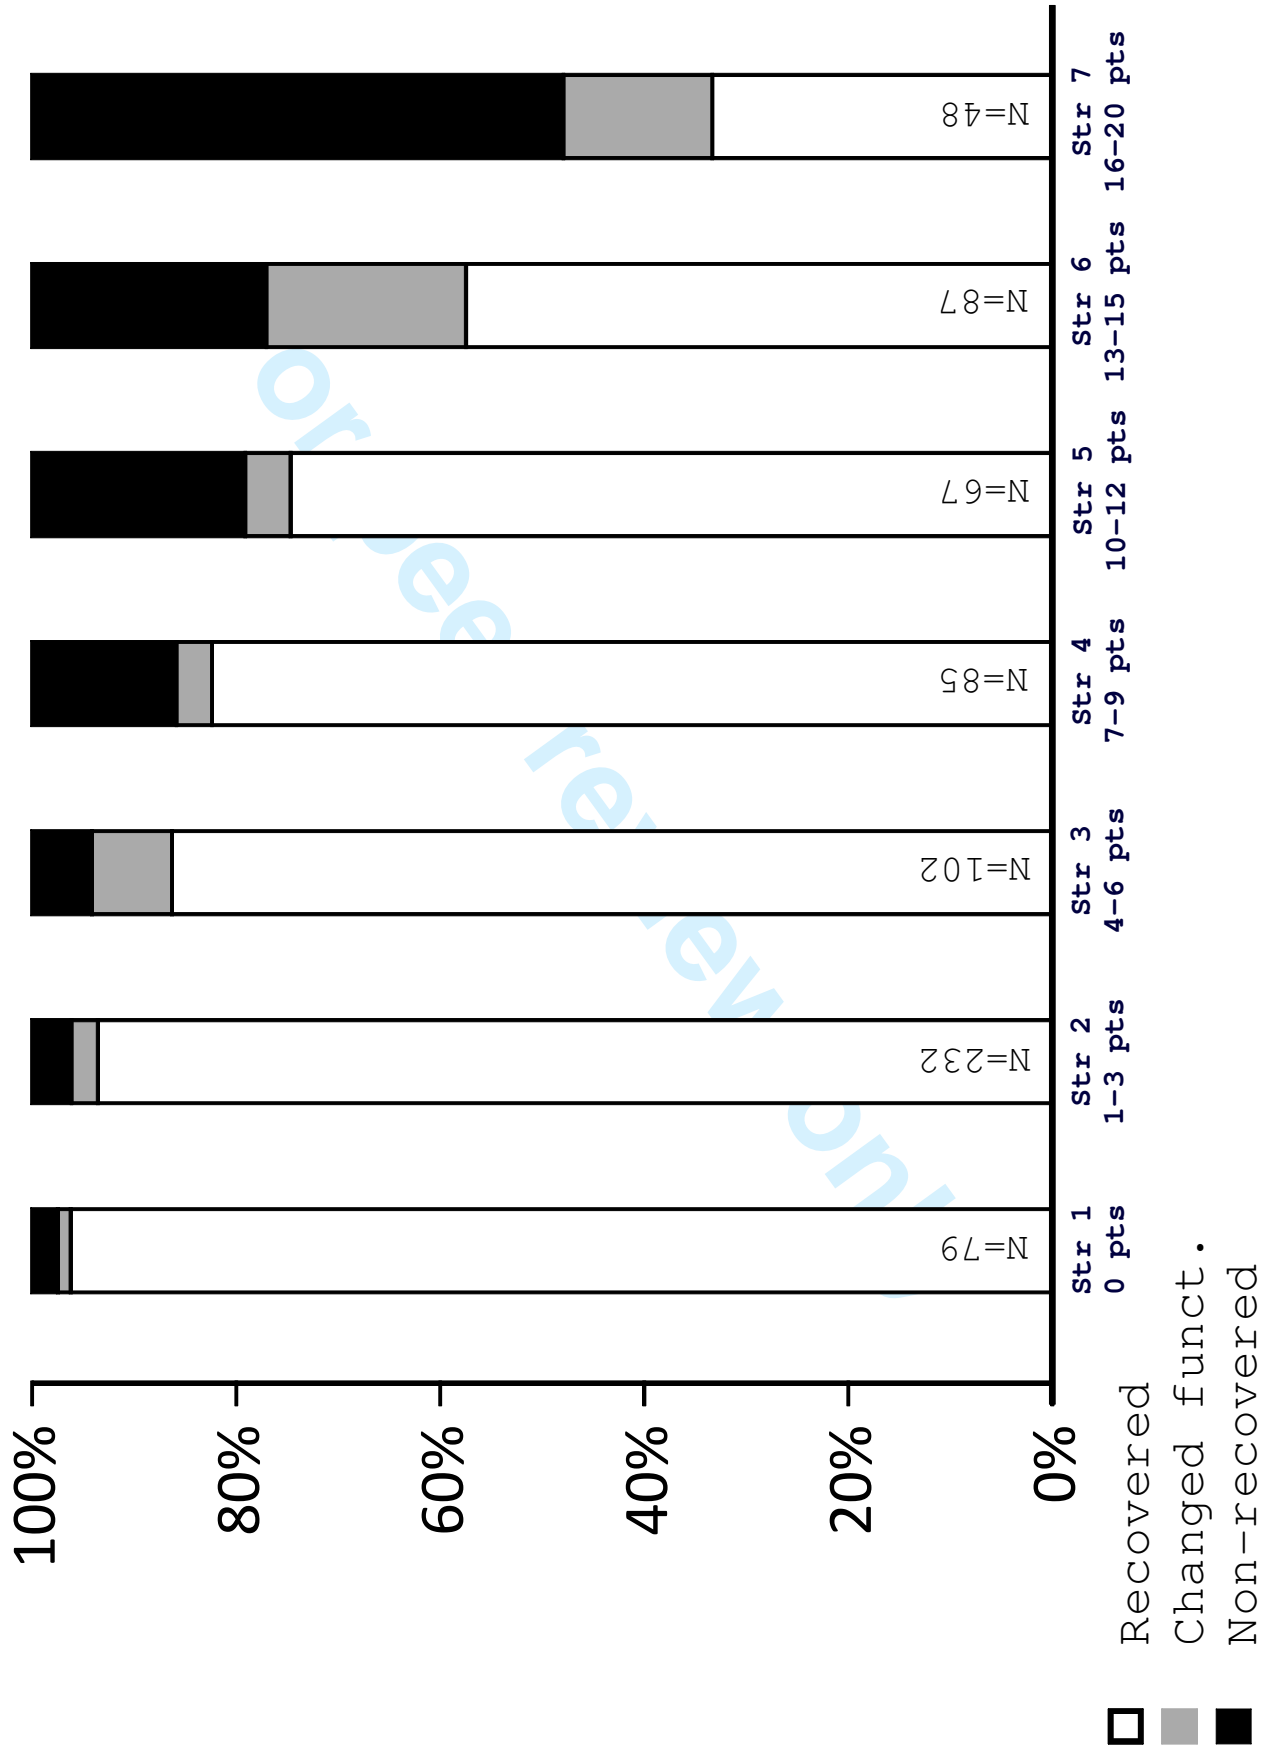

Fig. 3a

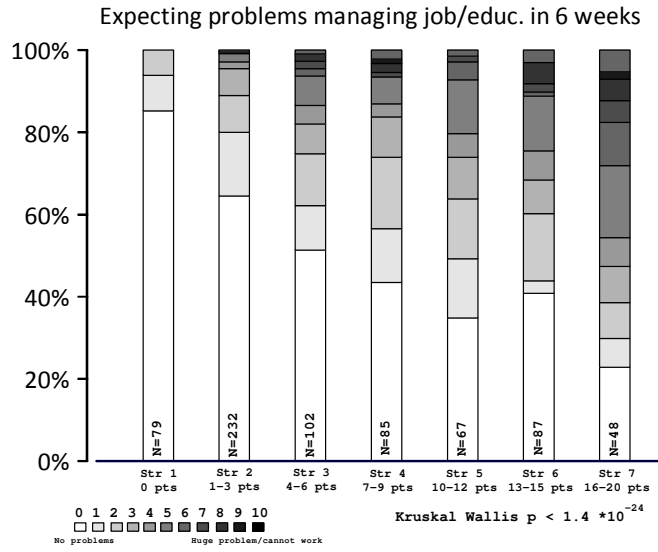

Fig. 3b

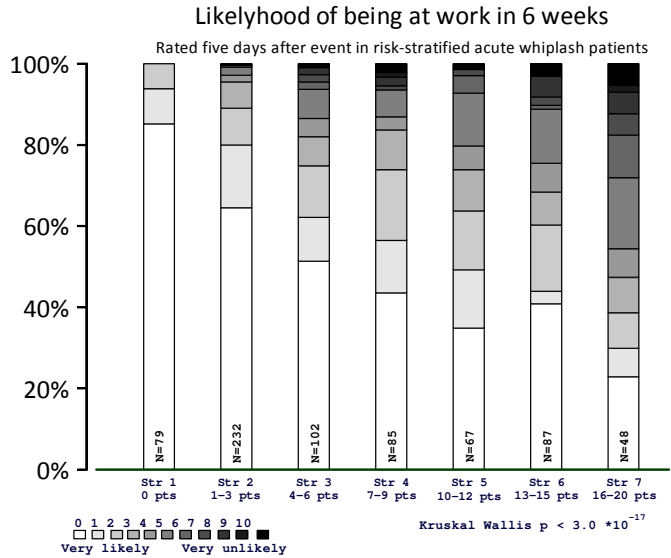

Fig. 3c

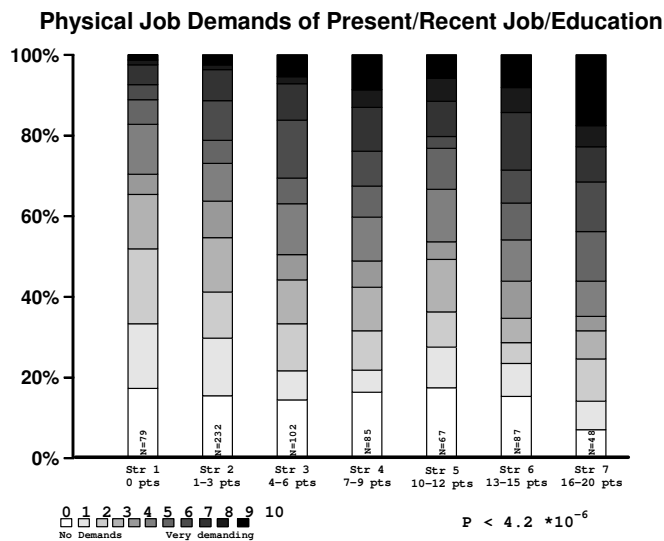

# Impact of Event in 7 Risk Strata

In Acute Whiplash Injury

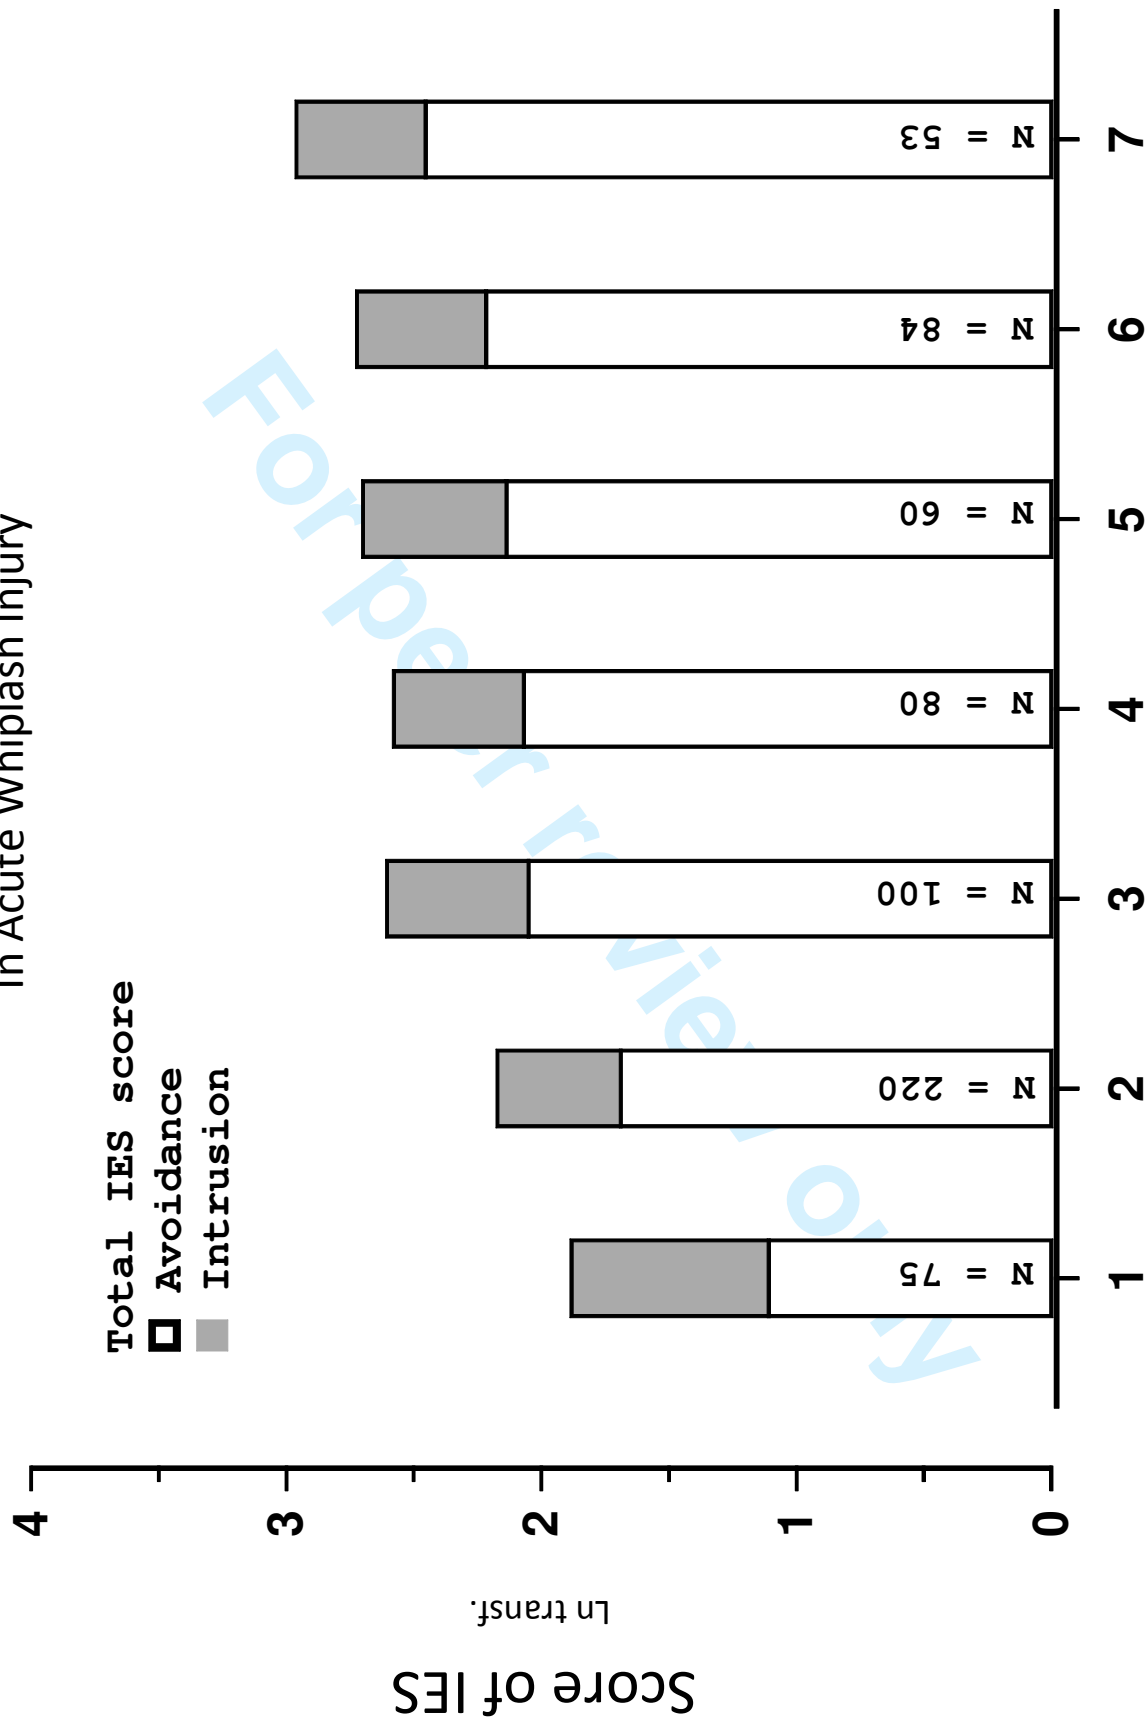

Risk strata 1-7

Kruskal-Wallis,  $p < 6.2 \times 10^{-6}$

# Muscle and Joint Pain in Strata

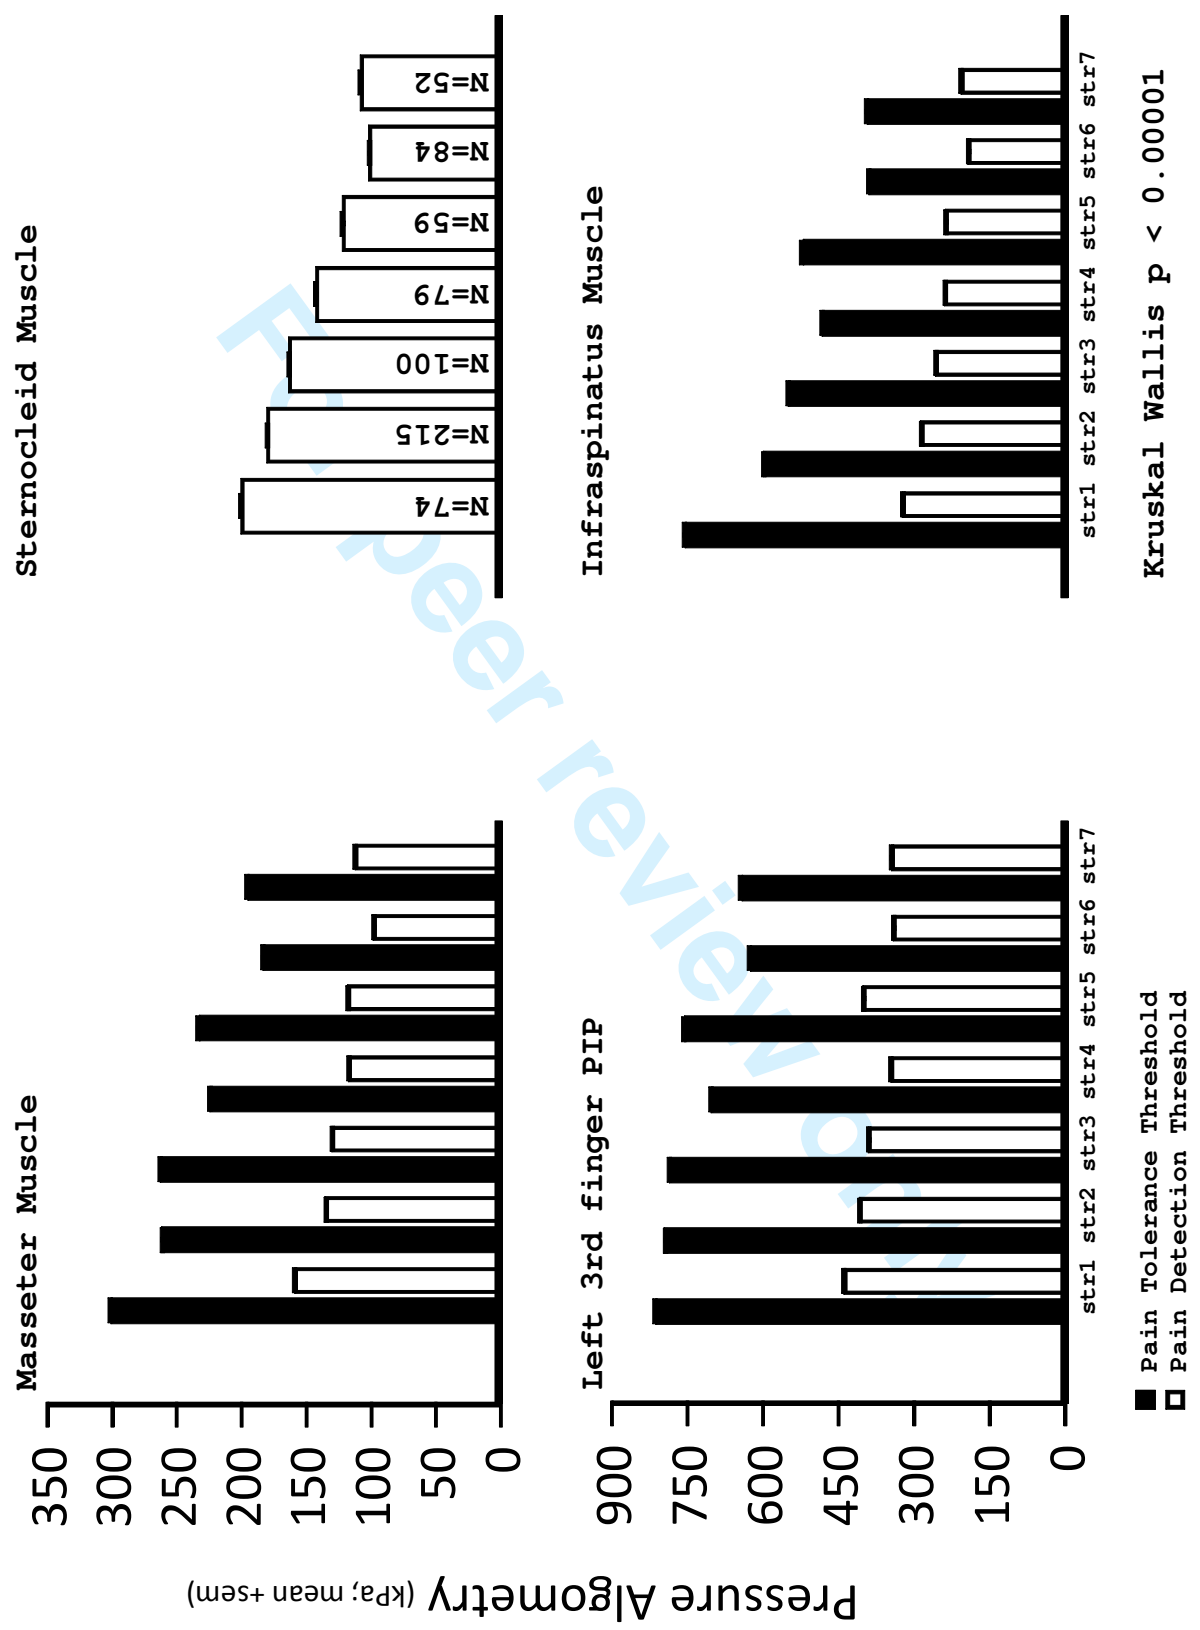

1  
2  
3  
4  
5  
6  
7  
8  
9  
10  
11  
12  
13  
14  
15  
16  
17  
18  
19  
20  
21  
22  
23  
24  
25  
26  
27  
28  
29  
30  
31  
32  
33  
34  
35  
36  
37  
38  
39  
40  
41  
42  
43  
44  
45  
46  
47  
48  
49  
50  
51  
52  
53  
54  
55  
56  
57  
58  
59  
60



1  
2  
3  
4  
5  
6  
7  
8  
9  
10  
11  
12  
13  
14  
15  
16  
17  
18  
19  
20  
21  
22  
23  
24  
25  
26  
27  
28  
29  
30  
31  
32  
33  
34  
35  
36  
37  
38  
39  
40  
41  
42  
43  
44  
45  
46  
47  
48  
49  
50  
51  
52  
53  
54  
55  
56  
57  
58  
59  
60

### ROC Curve

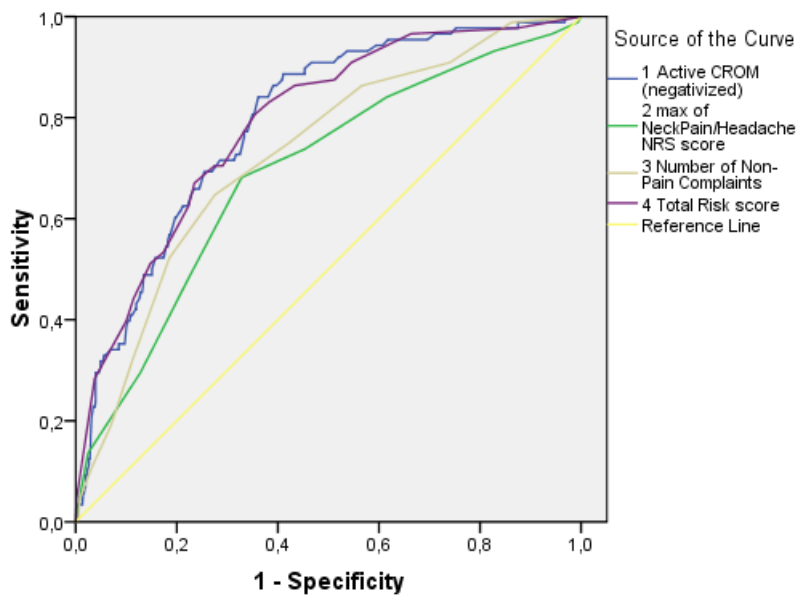

Diagonal segments are produced by ties.

er review only

## CONSORT Checklist of items to include when reporting a randomized trial

| PAPER SECTION<br>And topic                 | Item | Description                                                                                                                                                                                                                                                                                                                                                                                                                                                                                                                                                                                                                                                                                     | Reported on<br>Page #                               |
|--------------------------------------------|------|-------------------------------------------------------------------------------------------------------------------------------------------------------------------------------------------------------------------------------------------------------------------------------------------------------------------------------------------------------------------------------------------------------------------------------------------------------------------------------------------------------------------------------------------------------------------------------------------------------------------------------------------------------------------------------------------------|-----------------------------------------------------|
| TITLE & ABSTRACT                           | 1    | How participants were allocated to interventions (e.g., "random allocation", "randomized", or "randomly assigned").                                                                                                                                                                                                                                                                                                                                                                                                                                                                                                                                                                             | 3,8                                                 |
| INTRODUCTION<br>Background                 | 2    | Scientific background and explanation of rationale.                                                                                                                                                                                                                                                                                                                                                                                                                                                                                                                                                                                                                                             | 5                                                   |
| METHODS<br>Participants                    | 3    | Eligibility criteria for participants and the settings and locations where the data were collected.                                                                                                                                                                                                                                                                                                                                                                                                                                                                                                                                                                                             | 8-9                                                 |
| Interventions                              | 4    | Precise details of the interventions intended for each group and how and when they were actually administered.                                                                                                                                                                                                                                                                                                                                                                                                                                                                                                                                                                                  | 8                                                   |
| Objectives                                 | 5    | Specific objectives and hypotheses.                                                                                                                                                                                                                                                                                                                                                                                                                                                                                                                                                                                                                                                             | 7                                                   |
| Outcomes                                   | 6    | Clearly defined primary and secondary outcome measures and, when applicable, any methods used to enhance the quality of measurements (e.g., multiple observations, training of assessors).                                                                                                                                                                                                                                                                                                                                                                                                                                                                                                      | 13,14                                               |
| Sample size                                | 7    | How sample size was determined and, when applicable, explanation of any interim analyses and stopping rules.<br><br><small>26. Kongsted A, Qerama E, Kasch H, Bendix T, Bach FW, Korsholm L, et al. Neck collar, "act-as-usual" or active mobilization for whiplash injury? A randomized parallel-group trial. <i>Spine (Phila Pa 1976)</i> 2007;32(6):618-26.<br/>27. Kongsted A, Qerama E, Kasch H, Bach FW, Korsholm L, Jensen TS, et al. Education of patients after whiplash injury: is oral advice any better than a pamphlet? <i>Spine (Phila Pa 1976)</i> 2008;33(22):E843-8.</small>                                                                                                   | #) described in previous studies reporting RCT data |
| Randomization --<br>Sequence generation    | 8    | Method used to generate the random allocation sequence, including details of any restrictions (e.g., blocking, stratification)<br><br><small>26. Kongsted A, Qerama E, Kasch H, Bendix T, Bach FW, Korsholm L, et al. Neck collar, "act-as-usual" or active mobilization for whiplash injury? A randomized parallel-group trial. <i>Spine (Phila Pa 1976)</i> 2007;32(6):618-26.<br/>27. Kongsted A, Qerama E, Kasch H, Bach FW, Korsholm L, Jensen TS, et al. Education of patients after whiplash injury: is oral advice any better than a pamphlet? <i>Spine (Phila Pa 1976)</i> 2008;33(22):E843-8.</small>                                                                                 | 8, #) reported in previously published studies      |
| Randomization --<br>Allocation concealment | 9    | Method used to implement the random allocation sequence (e.g., numbered containers or central telephone), clarifying whether the sequence was concealed until interventions were assigned.<br><br><small>26. Kongsted A, Qerama E, Kasch H, Bendix T, Bach FW, Korsholm L, et al. Neck collar, "act-as-usual" or active mobilization for whiplash injury? A randomized parallel-group trial. <i>Spine (Phila Pa 1976)</i> 2007;32(6):618-26.<br/>27. Kongsted A, Qerama E, Kasch H, Bach FW, Korsholm L, Jensen TS, et al. Education of patients after whiplash injury: is oral advice any better than a pamphlet? <i>Spine (Phila Pa 1976)</i> 2008;33(22):E843-8.</small>                     | #) reported in previously published studies         |
| Randomization --<br>Implementation         | 10   | Who generated the allocation sequence, who enrolled participants, and who assigned participants to their groups.                                                                                                                                                                                                                                                                                                                                                                                                                                                                                                                                                                                | Pg 10                                               |
| Blinding (masking)                         | 11   | Whether or not participants, those administering the interventions, and those assessing the outcomes were blinded to group assignment. When relevant, how the success of blinding was evaluated.<br><br><small>26. Kongsted A, Qerama E, Kasch H, Bendix T, Bach FW, Korsholm L, et al. Neck collar, "act-as-usual" or active mobilization for whiplash injury? A randomized parallel-group trial. <i>Spine (Phila Pa 1976)</i> 2007;32(6):618-26.<br/>27. Kongsted A, Qerama E, Kasch H, Bach FW, Korsholm L, Jensen TS, et al. Education of patients after whiplash injury: is oral advice any better than a pamphlet? <i>Spine (Phila Pa 1976)</i> 2008;33(22):E843-8.</small>               | #) reported in previously published studies         |
| Statistical methods                        | 12   | Statistical methods used to compare groups for primary outcome(s); Methods for additional analyses, such as subgroup analyses and adjusted analyses.                                                                                                                                                                                                                                                                                                                                                                                                                                                                                                                                            | 14                                                  |
| RESULTS<br>Participant flow                | 13   | Flow of participants through each stage (a diagram is strongly recommended). Specifically, for each group report the numbers of participants randomly assigned, receiving intended treatment, completing the study protocol, and analyzed for the primary outcome. Describe protocol deviations from study as planned, together with reasons.                                                                                                                                                                                                                                                                                                                                                   | Figure 1<br>Flowchart,<br>Pg 15                     |
| Recruitment                                | 14   | Dates defining the periods of recruitment and follow-up.                                                                                                                                                                                                                                                                                                                                                                                                                                                                                                                                                                                                                                        | Fig 1 +<br>materials &<br>methods<br>section        |
| Baseline data                              | 15   | Baseline demographic and clinical characteristics of each group.                                                                                                                                                                                                                                                                                                                                                                                                                                                                                                                                                                                                                                | Fig 1 + pg15                                        |
| Numbers analyzed                           | 16   | Number of participants (denominator) in each group included in each analysis and whether the analysis was by "intention-to-treat". State the results in absolute numbers when feasible (e.g., 10/20, not 50%).<br><br><small>26. Kongsted A, Qerama E, Kasch H, Bendix T, Bach FW, Korsholm L, et al. Neck collar, "act-as-usual" or active mobilization for whiplash injury? A randomized parallel-group trial. <i>Spine (Phila Pa 1976)</i> 2007;32(6):618-26.<br/>27. Kongsted A, Qerama E, Kasch H, Bach FW, Korsholm L, Jensen TS, et al. Education of patients after whiplash injury: is oral advice any better than a pamphlet? <i>Spine (Phila Pa 1976)</i> 2008;33(22):E843-8.</small> | #) reported in previously published studies         |

|                              |    |                                                                                                                                                                                                                                                                                                                                                                                                                                                                                                                                                                                                                                                                   |                                             |
|------------------------------|----|-------------------------------------------------------------------------------------------------------------------------------------------------------------------------------------------------------------------------------------------------------------------------------------------------------------------------------------------------------------------------------------------------------------------------------------------------------------------------------------------------------------------------------------------------------------------------------------------------------------------------------------------------------------------|---------------------------------------------|
| Outcomes and estimation      | 17 | For each primary and secondary outcome, a summary of results for each group, and the estimated effect size and its precision (e.g., 95% confidence interval).<br><small>26. Kongsted A, Qerama E, Kasch H, Bendix T, Bach FW, Korsholm L, et al. Neck collar, "act-as-usual" or active mobilization for whiplash injury? A randomized parallel-group trial. <i>Spine (Phila Pa 1976)</i> 2007;32(6):618-26.<br/>27. Kongsted A, Qerama E, Kasch H, Bach FW, Korsholm L, Jensen TS, et al. Education of patients after whiplash injury: is oral advice any better than a pamphlet? <i>Spine (Phila Pa 1976)</i> 2008;33(22):E843-8.</small>                        | #) reported in previously published studies |
| Ancillary analyses           | 18 | Address multiplicity by reporting any other analyses performed, including subgroup analyses and adjusted analyses, indicating those pre-specified and those exploratory.<br><small>26. Kongsted A, Qerama E, Kasch H, Bendix T, Bach FW, Korsholm L, et al. Neck collar, "act-as-usual" or active mobilization for whiplash injury? A randomized parallel-group trial. <i>Spine (Phila Pa 1976)</i> 2007;32(6):618-26.<br/>27. Kongsted A, Qerama E, Kasch H, Bach FW, Korsholm L, Jensen TS, et al. Education of patients after whiplash injury: is oral advice any better than a pamphlet? <i>Spine (Phila Pa 1976)</i> 2008;33(22):E843-8.</small>             | #) reported in previously published studies |
| Adverse events               | 19 | All important adverse events or side effects in each intervention group.<br><small>26. Kongsted A, Qerama E, Kasch H, Bendix T, Bach FW, Korsholm L, et al. Neck collar, "act-as-usual" or active mobilization for whiplash injury? A randomized parallel-group trial. <i>Spine (Phila Pa 1976)</i> 2007;32(6):618-26.<br/>27. Kongsted A, Qerama E, Kasch H, Bach FW, Korsholm L, Jensen TS, et al. Education of patients after whiplash injury: is oral advice any better than a pamphlet? <i>Spine (Phila Pa 1976)</i> 2008;33(22):E843-8.</small>                                                                                                             | #) reported in previously published studies |
| DISCUSSION<br>Interpretation | 20 | Interpretation of the results, taking into account study hypotheses, sources of potential bias or imprecision and the dangers associated with multiplicity of analyses and outcomes.<br><small>26. Kongsted A, Qerama E, Kasch H, Bendix T, Bach FW, Korsholm L, et al. Neck collar, "act-as-usual" or active mobilization for whiplash injury? A randomized parallel-group trial. <i>Spine (Phila Pa 1976)</i> 2007;32(6):618-26.<br/>27. Kongsted A, Qerama E, Kasch H, Bach FW, Korsholm L, Jensen TS, et al. Education of patients after whiplash injury: is oral advice any better than a pamphlet? <i>Spine (Phila Pa 1976)</i> 2008;33(22):E843-8.</small> | #) reported in previously published studies |
| Generalizability             | 21 | Generalizability (external validity) of the trial findings.                                                                                                                                                                                                                                                                                                                                                                                                                                                                                                                                                                                                       | 18,19,20                                    |
| Overall evidence             | 22 | General interpretation of the results in the context of current evidence.                                                                                                                                                                                                                                                                                                                                                                                                                                                                                                                                                                                         | 18,19,20                                    |

1  
2  
3  
4  
5  
6  
7  
8  
9  
10  
11  
12  
13  
14  
15  
16  
17  
18  
19  
20  
21  
22  
23  
24  
25  
26  
27  
28  
29  
30  
31  
32  
33  
34  
35  
36  
37  
38  
39  
40  
41  
42  
43  
44  
45  
46  
47  
48  
49  
50  
51  
52  
53  
54  
55  
56  
57  
58  
59  
60

---

## Contributorship Statement

---

|                 | Conception | Design | Analysis | Interpretation of data | Drafting article | Critical revision | Final approval of version to be published |
|-----------------|------------|--------|----------|------------------------|------------------|-------------------|-------------------------------------------|
| Helge Kasch     | X          | X      | X        | X                      | X                | X                 | X                                         |
| Alice Kongsted  | X          | X      | X        | X                      |                  | X                 | X                                         |
| Erisela Qerama  | X          | X      |          |                        |                  | X                 | X                                         |
| Flemming W Bach | X          | X      |          |                        |                  | X                 | X                                         |
| Tom Bendix      | X          | X      |          |                        |                  | X                 | X                                         |
| Troels S Jensen | X          | X      | X        | X                      | X                | X                 | X                                         |

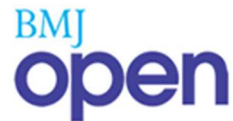

**A new stratified risk assessment tool for whiplash injuries predicts recovery**

|                                 |                                                                                                                                                                                                                                                                                                                                                                                                                                                          |
|---------------------------------|----------------------------------------------------------------------------------------------------------------------------------------------------------------------------------------------------------------------------------------------------------------------------------------------------------------------------------------------------------------------------------------------------------------------------------------------------------|
| Journal:                        | <i>BMJ Open</i>                                                                                                                                                                                                                                                                                                                                                                                                                                          |
| Manuscript ID:                  | bmjopen-2012-002050.R1                                                                                                                                                                                                                                                                                                                                                                                                                                   |
| Article Type:                   | Research                                                                                                                                                                                                                                                                                                                                                                                                                                                 |
| Date Submitted by the Author:   | 22-Nov-2012                                                                                                                                                                                                                                                                                                                                                                                                                                              |
| Complete List of Authors:       | Kasch, Helge; Danish Pain Research Centre, Dept of Neurology<br>Kongsted, Alice; Nordic Institute of Chiropractic and Clinical Biomechanics<br>Qerama, Erisela; Aarhus University Hospital, Dept of Neurophysiology<br>Bach, Flemming; Aarhus University Hospital, Aalborg Sygehus, Neurology<br>Bendix, Tom; Copenhagen Spine Center, Glostrup Hospital, Dept. of<br>Rheumatology<br>Jensen, Troels; The Danish Pain Research Center, Dept of Neurology |
| <b>Primary Subject Heading</b>: | Evidence based practice                                                                                                                                                                                                                                                                                                                                                                                                                                  |
| Secondary Subject Heading:      | Rehabilitation medicine, Diagnostics, Neurology, Legal and forensic medicine                                                                                                                                                                                                                                                                                                                                                                             |
| Keywords:                       | Neurological pain < NEUROLOGY, TRAUMA MANAGEMENT, Trauma management < ORTHOPAEDIC & TRAUMA SURGERY, ACCIDENT & EMERGENCY MEDICINE                                                                                                                                                                                                                                                                                                                        |
|                                 |                                                                                                                                                                                                                                                                                                                                                                                                                                                          |

SCHOLARONE™  
Manuscripts

only

**Heading at BMJ**

---

**A new stratified risk assessment tool for whiplash injuries predicts recovery**

---

Helge Kasch, MD, PhD Senior Consultant Neurologist<sup>1)</sup>; Alice Kongsted, DMSc(Clin Biomech), PhD Senior Research fellow<sup>2)</sup>; Erisela Qerama, MD PhD, Consultant Neurophysiologist<sup>3)</sup>; Flemming W. Bach, MD DMSc, Clinical Professor of Neurology<sup>4)</sup>; Tom Bendix, MD DMSc, Clinical Professor of Rheumatology<sup>5)</sup>; Troels Staehelin Jensen MD DMSc, Clinical Professor of Neurology<sup>1)</sup>

- 1) The Danish Pain Research Center, Dept. of Neurology, Aarhus University Hospital, Noerrebrogade 44; DK-8000 Aarhus, Denmark
- 2) Department of Research, Spine Center of Southern Denmark, Hospital Lillebaelt, Institute of Regional Health Research, University of Southern Denmark
- 3) Dept. of Neurophysiology, Aarhus University Hospital, Noerrebrogade 44; DK-8000 Aarhus, Denmark
- 4) Dept. of Neurology, Aarhus University Hospital, Aalborg Hospital, Ladegaardsgade 5 DK-9100 Aalborg, Denmark
- 5) Copenhagen Spine Center, Glostrup Hospital, Ndr. Ringvej 57, 2600-DK, Glostrup, Denmark

*Stratification method for whiplash injuries*

Contact: Helge Kasch, Senior Consultant Neurologist, PhD. The Headache Clinic and Danish Pain Research Center, Dept. of Neurology, Aarhus University Hospital, Noerrebrogade 44, DK-8000 Aarhus DENMARK. Email: [helge.kasch@dadlnet.dk](mailto:helge.kasch@dadlnet.dk), Tel.: + 45 8949 3333; Fax: +45 8949 3300

**Key Words**

Whiplash Injuries, Prognosis, Neck Pain, Headache, Range-of-Motion, Risk Factors

**Number of figures: 5 + 1 supplemental figure S1**

**Number of tables: 1**

**Number of words count: 3038 (incl. acknowledgements)**

**Correspondence to**

Dr. Helge Kasch, Dept. of Neurology, Aarhus University Hospital, Noerrebrogade 44, DK-8000 Aarhus, Denmark. Email [helge.kasch@dadlnet.dk](mailto:helge.kasch@dadlnet.dk)

Fax: 0045 89493300

**Abstract: (268 words)**

Objectives

*Stratification method for whiplash injuries*

1  
2  
3 This paper presents an initial stratification of acute whiplash patients into 7  
4  
5 risk-strata in relation to a 1-year outcome.  
6  
7

### 8 Design

9  
10 The design applied was an observational prospective study of risk factors  
11  
12 embedded in a randomized controlled study.  
13  
14

### 15 Setting

16  
17 Acute whiplash patients from the units and general practitioners in 4 Danish  
18  
19 counties were referred to two research centers.  
20  
21

### 22 Participants

23  
24 During a 2-year inclusion period, acute consecutive whiplash-injured (age 18-  
25  
26 70 y, rear- or frontal-end MVA, WAD grades I-III symptoms within 72 h,  
27  
28 examination prior to 10 days post-injury, capable of written/spoken Danish,  
29  
30 without: other injuries/fractures, pre-existing significant somatic/psychiatric  
31  
32 disorder, drug/alcohol abuse, and previous significant pain/headache). Six-  
33  
34 hundred and eighty-eight (438 F, 250 M) participants were interviewed and  
35  
36 examined after 5 days, 605 completed after 1 year.  
37  
38

39  
40 A risk score which included items of initial neck-pain/headache intensity,  
41  
42 number-of non-painful complaints, and active neck mobility was applied.  
43  
44

45  
46 One-year primary outcome parameter was work disability. Results

47  
48 Risk score and number of sick-listing days were related ( $p < 0.0001$ ). In  
49  
50 stratum 1 less than four percent, but in stratum 7 sixty-eight percent were  
51  
52  
53  
54  
55  
56  
57  
58  
59  
60



*Stratification method for whiplash injuries*

1  
2  
3 work disabled after 1 year. Bio-psychosocial factors were significantly  
4  
5 segregated from the first assessment by risk strata, neck and jaw muscle  
6  
7 soreness (Kruskal-Wallis,  $p < 0.0001$ ), pressure algometry ( $p < 0.0001$ ),  
8  
9 McGill pain questionnaire parameters ( $p < 0.0001$ ), impact of event ( $p <$   
10  
11  $0.0006$ ), and early work assessment ( $p < 0.0001$ ).  
12  
13  
14

### Conclusion

15  
16  
17 Application of the risk assessment score and use of the risk strata system  
18  
19 may be fruitfully applied in future studies and may be considered a valuable  
20  
21 tool to assess return to work following injuries, however further studies are  
22  
23  
24  
25  
26  
27  
28  
29  
30  
31  
32  
33  
34  
35  
36  
37  
38  
39  
40  
41  
42  
43  
44  
45  
46  
47  
48  
49  
50  
51  
52  
53  
54  
55  
56  
57  
58  
59  
60 needed.

*Stratification method for whiplash injuries***Introduction**

Chronic pain represents a major problem in the Western World with approximately 20% of the adult population suffering from chronic pain. Our ability to deal with these chronic pain conditions is insufficient as it is in various other areas, such as traumatic injuries and pain following surgery or other medical procedures. Identifying patients at risk of developing chronic pain is a prerequisite for establishment of prophylactic initiatives.

When discussing pain following surgery, it has been demonstrated that prior pain intensity, the duration of pain, the type of surgery, the nerve damage during surgery as well as psychological factors, information and the setting and the genetic endowment are of significant importance with respect to the future development and persistence of chronic pain<sup>1-5</sup>. Also regarding musculoskeletal pain conditions, such as headache<sup>6</sup>, cervical sprains<sup>7</sup>, and low back pain conditions,<sup>8</sup> there is an interest in exploring the potential risk factors aligned with persistent pain. The specific type of distortion of the cervical spine, stemming from a so-called *whiplash injury*, in which the neck spine is exposed to a forced extension-flexion trauma, is often followed by a late pain state known as whiplash-associated disorders (WAD).<sup>9 10</sup>

These injuries may be associated with a reduction of the pain threshold to mechanical pressure in the neck muscles<sup>11 12</sup>, a reduction of nociceptive

*Stratification method for whiplash injuries*

1  
2  
3 flexion reflexes,<sup>13</sup> and an expansion of cutaneously referred pain symptoms  
4  
5 following infusion of hypertonic saline into muscles both at the injury site and  
6  
7 in areas remote from the injury site.<sup>14</sup> These findings suggest generalized  
8  
9 hyper- excitability following a whiplash injury which resolves in patients  
10  
11 recovering after injury but persists in patients with ongoing symptoms<sup>2 11 15-17</sup>  
12  
13 Whiplash-associated disorders fall into the categories O-IV according to the  
14  
15 Quebec WAD grading<sup>9</sup>. In a previous observation study we found that a risk  
16  
17 score based on neck pain, headache, the number of non-painful symptoms,  
18  
19 and reduced neck mobility to be associated with a marked risk of reduced  
20  
21 recovery.<sup>19</sup> Based on these observations the objective of this study was to test  
22  
23 a stratified risk assessment scoring system for predicting long-term sequelae  
24  
25 after a whiplash injury. A risk index was developed in a previous cohort and  
26  
27 the predictive capability of seven risk strata tested. {Kasch, 2001 #792; Kasch,  
28  
29 2011 #2297}. In the present study we test if the seven risk strata are useful  
30  
31 for prediction of outcome in that second sample. In addition, differences in  
32  
33 psychological and social factors across the strata are described.  
34  
35  
36  
37  
38  
39  
40  
41  
42  
43  
44

***Materials and methods******Study overview***

45  
46  
47  
48  
49 A risk stratification index based on measures of intensity of neck pain and  
50  
51 headache, cervical range of motion (CROM), and number of non-painful  
52  
53 complaints was developed in a previous sample of whiplash injured seen in  
54  
55  
56  
57  
58  
59  
60

*Stratification method for whiplash injuries*

1  
2  
3 an emergency care unit {Kasch, 2001 #792}. Using a pragmatic approach  
4  
5 seven risk strata were formed and this stratification was strongly associated  
6  
7  
8 with outcome{Kasch, 2011 #2297}.

9  
10  
11 In the present study these risk strata are tested in another sample enrolled  
12  
13 between May 2001 and June 2003. The study is a secondary analysis of two  
14  
15 parallel RCTs {Kongsted, 2008 #2238;Kongsted, 2007 #786}. Patients were  
16  
17 enrolled within 10 days of a whiplash injury. Those with a low risk stratification  
18  
19 index score were randomised to either oral or written advice to act as usual  
20  
21 {Kongsted, 2008 #2238} whereas patients with high risk scores were  
22  
23 randomised to immobilization (semi-rigid neck collar), active mobilization  
24  
25 (McKenzie technique) or the oral recommendation to act as usual {Kongsted,  
26  
27 2007 #786}.(Refer to fig. 1) The oral and written advice were delivered at the  
28  
29 day of inclusion. The neck collar and active mobilization interventions  
30  
31 involved contact to a physical therapist for a maximum of six weeks. Details  
32  
33 about the interventions are reported elsewhere {Kongsted, 2008  
34  
35 #2238;Kongsted, 2007 #786} No significant differences in treatment effects  
36  
37 were demonstrated and participants are therefore considered one cohort for  
38  
39 the present study. The study was approved by the local ethical committees  
40  
41 (The Scientific Committee for The Counties of Vejle and Funen, Project  
42  
43 number 20000268) and conducted in accordance with the Helsinki II  
44  
45 Declaration.  
46  
47  
48  
49  
50  
51  
52  
53  
54  
55  
56  
57  
58  
59  
60

*Stratification method for whiplash injuries***Study population**

The cohort has been described previously {Kongsted, 2007 #786;Kasch, 2008 #783;Kasch, 2008 #2177;Kongsted, 2008 #2238}. In short, persons with complaints from the neck and/or shoulder girdle (WAD grade I-III) seeking care at an emergency unit or a general practitioner within 72 hours after a motor vehicle collision were potential participants. Other inclusion criteria were: Age 18-70 years, exposure to a rear- or frontal-end car accident, and that an examination could be performed within 10 days after the injury. Exclusion criteria were inability to read and speak Danish, injuries with fractures or dislocations (WAD grade IV), additional trauma other than the whiplash injury, pre-existing significant somatic or psychiatric disease, known active alcohol or drug abuse, and significant headache or neck pain (self-reported average pain during the preceding six months exceeding 2 on a 0-10 box scale, 0=no pain; 10=worst possible pain).

*Stratification method for whiplash injuries***Baseline registrations***Patient reported*

Pain: Neck pain and headache since the collision were scored on an eleven-point Numeric Rating Scale (0= no pain; 10=worst imaginable pain) {Collins, 1997 #81;Dworkin, 2008 #1464}.

Non-painful complaints: Participants were asked whether any of eleven non-painful complaints (paresthesia, dizziness, vision disturbances, tinnitus, hyperacusis, dysphagia, fatigue, irritation, concentration disturbances, memory difficulties, and sleep disturbances) had started or been markedly worse since the accident.

Post Traumatic Stress Response: Was measured by means of the Impact of Event Scale (IES) {Horowitz M, 1979 #206}. A total sum-score was calculated from all 15 items of the scale. In addition, an intrusion score (sum of 7 items) and an avoidance score (sum of 8 items) were calculated.

Work related factors: Expected difficulties with work were measured by asking “How big a problem do you expect it to be to take care of your job/study six weeks from now?” (0=no problem at all; 10=A very big problem, cannot work), and “How likely do you consider it that you will be

*Stratification method for whiplash injuries*

1  
2  
3 working/studying 6 weeks from now?" (0=very likely; 10=very unlikely). Self  
4  
5 rated physical work demands were registered asking: "How physical  
6  
7 demanding do you consider your present/most recent job" (0=not physical  
8  
9 demanding at all; 10=very physical demanding).  
10  
11  
12  
13

*Clinical assessment*

14  
15  
16  
17  
18 Active neck mobility: Total CROM (CROM=cervical range of motion)  
19  
20 including flexion, extension, right and left lateral-flexion, and right and left  
21  
22 rotation was assessed with a CROM device as formerly described {Kasch,  
23  
24 2001 #793;Kasch, 2008 #2177}.Is used as part of the risk assessment score.  
25  
26  
27 High scores with reduced mobility and low scores with better performance.  
28  
29  
30  
31  
32

33  
34 Pressure algometry: The handheld Algometer (Somedic Algometer type 2 <sup>TM</sup> )  
35  
36 was applied with a slope of 30kpa/sec and a probe area of 1.0 sq.cm,  
37  
38 pressure pain detection thresholds (PPDT) were measured in triplets,  
39  
40 whereas pressure pain tolerance thresholds (PPT) were measured by one  
41  
42 application of pressure only{Kasch, 2008 #783}.  
43  
44  
45  
46  
47  
48

49  
50 Methodical muscle palpation was performed bilaterally at nine sites: 1) the  
51  
52 anterior part of the temporal muscle, 2) the posterior part of the temporal  
53  
54 muscle, 3) the masseter muscle, 4) the lateral pterygoid muscle, 5) the  
55  
56  
57  
58  
59  
60

*Stratification method for whiplash injuries*

1  
2  
3 sternocleid at the mastoid insertion point, 6) the sternocleid at its middle belly,  
4  
5  
6 7) the suboccipital muscle group, 8) the superior trapezius muscle, and 9) the  
7  
8 rhomboid muscle along the medial border of the scapula. At each palpation  
9  
10 site a pain score (0-4) was obtained {Wolfe, 1990 #527}{Kasch, 2008 #783}  
11  
12  
13 with:

- 14
- 15
- 16 • 0 equaling neither pain nor reported tenderness,
- 17
- 18 • 1 equaling complaints of mild pain but no facial contortion
- 19 (grimace), flinch or withdrawal,
- 20
- 21 • 2 equaling a moderate pain and degree of facial contortion
- 22 (grimace) or flinch,
- 23
- 24 • 3 equaling a severe pain and marked flinch or withdrawal, and
- 25
- 26 • 4 equaling unbearable pain and withdrawal without palpation.
- 27
- 28
- 29
- 30
- 31
- 32
- 33
- 34
- 35
- 36
- 37
- 38
- 39

**Risk stratification**

40  
41  
42 The risk stratification was performed as previously described by combining  
43 scores on pain intensity, CROM and number of non-painful  
44 complaints{Kasch, 2011 #2230}. Each factor was categorised and scored as  
45 follows:  
46  
47  
48  
49  
50

51  
52 The highest score of neck pain and headache was categorised into: 0-2=0  
53 points; 3-4=1 point; 5-8=4 points, 9-10=6 points.  
54  
55  
56  
57  
58  
59  
60



*Stratification method for whiplash injuries*

Total active CROM was divided into: Below 200 degrees=10 points; 200-220=8 points; 221-240=6 points; 241-260=4 points; 261-280=2 points; above 280=0 points.

Number-of non-painful complaints: 0-2=0 points; 3-5=1 point; 6-11=3 points.

Following stratification was made: Stratum 1=0 points; stratum 2=1-3 points; stratum 3=4-6 points; stratum 4=7-9 points; stratum 5=10-12 points; stratum 6=13-15 points, and stratum 7=16-19 points .

**Outcome measures**

Follow-up questionnaires were posted to participants after 3, 6 and 12 months. Only 12 months follow-up was used for the present study.

*The primary outcome measure*

The primary outcome variable selected a priori was handicap, which was defined as: a) sick leave > 3 months during the last 6 months; b) work inability during the entire last month; or c) not working anymore because of the accident.<sup>2</sup> The number of days on sick leave was computed by means of a completed diary (a patient log) and questionnaire data after 3, 6, and 12 months post-injury. Days with sick leave counted as full days and days with reduced working hours counted as half days of sick leave. If the patient could manage a full-time job but had changed functions after injury, it counted as full working hours. Patients who did not work prior to the injury (on leave, unemployed, disability pension, retired) were not considered in the calculated

*Stratification method for whiplash injuries*

1  
2  
3 risk of 1-year work disability but were included in computation of the  
4  
5 secondary outcome measures., Secondary outcome measures have been  
6  
7 described elsewhere {Kongsted, 2007 #786;Kongsted, 2008 #2238}.

**Statistical analysis**

10  
11  
12  
13  
14  
15  
16  
17 Data Analyses were made with Stata 12.0™ (StataCorp, Texas US) and  
18  
19 Microsoft Excel 2010 for Windows™. Non-parametric statistics were applied  
20  
21 for evaluating risk strata. Parametric data with normal distribution or log  
22  
23 normal distribution was presented within each risk stratum graphs as mean ±  
24  
25 sem values. Likelihood ratios were computed for each stratum for primary  
26  
27 endpoints (refer to supplementary table 1).  
28  
29  
30  
31  
32  
33  
34  
35  
36  
37  
38  
39  
40  
41  
42  
43  
44  
45  
46  
47  
48  
49  
50  
51  
52  
53  
54  
55  
56  
57  
58  
59  
60

*Stratification method for whiplash injuries***Results**

Details of the study population has been described previously, a flow chart is presented in figure 1.<sup>30</sup> Briefly, a total of 1495 [F/M: 898/597] acute whiplash patients were contacted after being examined at the emergency units or by their general practitioners. Six hundred and eighty-eight eligible acute whiplash patients [F/M: 443/252] gave informed written and verbal consent to participate.

Two-hundred [F/M: 102/98] patients refused to participate. Five hundred and forty patients were ineligible, fifteen were excluded due to protocol violation. Fifty-two patients with low-risk scores with a former moderate neck pain (VAS < 4) were excluded from the main study (fig. 1), but these patients were followed according to principles in the low risk group. (Results from these patients will be reported elsewhere).

Risk strata:

Fig. 2a shows a log-linear relationship between the risk assessment score and the number of days being sick for acute whiplash patients.

Fig. 2b shows distribution in the risk strata after one year of patients a) returning to work or b) have reduced functional capacity in full-time jobs or c)

*Stratification method for whiplash injuries*

1  
2  
3 being work disabled. Whereas 96% had returned to work in stratum 1, only  
4  
5 32% of previous healthy whiplash-exposed in stratum 7 were back to work  
6  
7  
8 after 1 year (Kruskal-Wallis,  $p < 0.0001$ ).  
9

10  
11  
12  
13 In figures 3a-c the ability to perform work within 6 weeks and the ability to  
14  
15 return to work within 6 weeks and the assessment of the physical job  
16  
17 demands of their present/recent were rated after 5 median days on an NRS-  
18  
19 11-point box scale. Job-related issues were increasingly severe the higher  
20  
21 risk stratum of the patient (Kruskal-Wallis,  $p < 0.0001$ ).  
22  
23  
24  
25  
26  
27  
28

29 The components of the impact of event scale in fig. 4 intrusion and avoidance  
30  
31 and the total IES score were bar-graphed for each stratum. There was an  
32  
33 increase in reported injury-related emotional distress in the risk strata  
34  
35 (Kruskall Wallis,  $p < 0.0001$ ).  
36  
37  
38  
39  
40  
41

42 Figures 5 a-e display the bar graphs of strata representing pressure  
43  
44 algometry for both pain detection and pain tolerance thresholds for the  
45  
46 muscles in the neck region: the masseter and the infraspinatus muscles and  
47  
48 at a remote control site at the left 3rd finger joint. All these psycho-physical  
49  
50 measures are differently distributed in the risk strata (K-W,  $p < 0.0001$ ). The  
51  
52 total palpation score was similarly distributed significantly different in risk  
53  
54  
55  
56  
57  
58  
59  
60

*Stratification method for whiplash injuries*

1  
2  
3 strata (K-W  $p < 0.0001$ ) with a score of 6 in stratum 1 and of 24 in stratum 7  
4  
5 (refer to Supplementary figure 2).  
6  
7

8 The Copenhagen Neck Disability Index score after 1 year was significantly  
9  
10 related to risk strata (K-W,  $p < 0.0001$ ) and also 1-year 11-point box score of  
11  
12 shoulder-arm pain, and neck pain, headache and global pain were  
13  
14 significantly related to risk strata ( $p < 0.0001$ ) .  
15  
16  
17  
18  
19  
20  
21  
22  
23  
24  
25  
26  
27  
28  
29  
30  
31  
32  
33  
34  
35  
36  
37  
38  
39  
40  
41  
42  
43  
44  
45  
46  
47  
48  
49  
50  
51  
52  
53  
54  
55  
56  
57  
58  
59  
60

*Stratification method for whiplash injuries***Discussion**

This study shows that an early classification of patients into risk strata based on biological and certain psycho-social functions predicts non-recovery. In order to group patients into 7 different strata we used a scaling system resulting from observational findings from a former study. This system included four predefined categories: neck pain intensity, headache intensity, the number of non-painful symptoms and reduced neck mobility. The strata set in the present study was applied in clinical procedures undertaken at a time point where chronic symptoms could not have developed i.e. < median 5 days after injury. The scoring on neck mobility and non-painful symptoms was based on previous observations where a control group was included.<sup>19</sup> The summation score was arbitrarily determined, and it may be argued that if another scoring had been used, other findings might have been ascertained. Nevertheless, the scoring derived from the findings from a prospective observational study of acute whiplash patients (WAD I-III) with an ankle-injured control group in which active neck mobility was the most significant predictor for work disability. Neck pain / headache intensity as well as a high number of non-painful complaints were also predictive, however, to a lesser extent<sup>19</sup> as reflected in the supplemental ROC curves in fig S1. In the present work and in our previous studies<sup>19</sup> we used return-to-work and number-of days parameters with sick leaves of 1 year as indicators of work disability.

*Stratification method for whiplash injuries*

1  
2  
3 The use of sick leave as a parameter of non-recovery has been discussed  
4 previously.<sup>19</sup> It may be argued that sick leaves are not a direct measure of  
5 non-recovery. But as for subjective symptoms such as pain, it is crucial to  
6 select robust and directly quantifiable factors in order to reduce the risk of  
7 investigator bias. Moreover, the fact that all measures were completed shortly  
8 after injury means that patients were in all probability prevented from  
9 changing their habitual, pre-injury health belief, which could have been  
10 affected by various sources, like the mass media, healthcare persons, family,  
11 or friends.<sup>23 35</sup>

12  
13 The present study was embedded in a treatment study in which patients were  
14 divided into a low risk and a high risk treatment group (see fig,.1). By  
15 stratifying into their respective risk strata and splitting the low and high risk  
16 groups there was no difference on 1 year work disability based on their given  
17 treatment (K-W  $p > 0.15$  for high risk patients;  $p > 0.91$  for low risk patients).  
18 Patients were furthermore not informed or being aware of whether they  
19 belonged to a high-risk or a low-risk group. Biological responses like neck  
20 strength, duration of neck movement, and psychophysical like  
21 muscletenderness by palpation and pressure algometry and the cold-pressor  
22 pain response<sup>28</sup> as well as stressful parameters like fear-avoidance and  
23 intrusion parameters, and work-related issues are logically distributed in the  
24 risk strata. The present risk stratification scheme rests on a selected and  
25  
26  
27  
28  
29  
30  
31  
32  
33  
34  
35  
36  
37  
38  
39  
40  
41  
42  
43  
44  
45  
46  
47  
48  
49  
50  
51  
52  
53  
54  
55  
56  
57  
58  
59  
60

*Stratification method for whiplash injuries*

1  
2  
3 limited number of symptoms and signs based on prior observed findings.  
4  
5  
6 Legislative and detailed psycho-social factors were not included in the  
7  
8 stratification. Such factors might also have an impact although the chances  
9  
10 are that legislative issues hardly affect recovery as early as 5 days after  
11  
12 injury. There may be other possible factors that can affect recovery<sup>24</sup>. In the  
13  
14 present paper we suggest a way of stratifying whiplash patients in the acute  
15  
16 state in order to improve the predictive power of prognosis. While the risk  
17  
18 strata presented here need to be tested as prognostic factors in other cohorts  
19  
20 in order to validate our findings, the present study is one of the largest  
21  
22 materials in the literature. Moreover, the system has not yet been tested in  
23  
24 relation to its possible usefulness in guiding clinical decisions about the  
25  
26 choice of treatment. It is a possible downside to risk assessment, that health-  
27  
28 care professionals could make premature or hasty decisions when faced with  
29  
30 a certain patient who scores high on a prognostic scale like ours. With such  
31  
32 scorings health-care professionals might unconsciously associate the  
33  
34 patient's injury with a prognosis of the chronicity type and act accordingly to  
35  
36 some extent. The Quebec Task Force's WAD grading represented a first  
37  
38 attempt to better characterize and identify patients at risk for long-term  
39  
40 consequences after a whiplash injury. However, subsequent studies  
41  
42 demonstrated that the Quebec WAD grading was of little value in predicting  
43  
44 long-term sequelae.<sup>9 18</sup>. Emotional distress and social factors implicated a  
45  
46  
47  
48  
49  
50  
51  
52  
53  
54  
55  
56  
57  
58  
59  
60



*Stratification method for whiplash injuries*

1  
2  
3 risk of reduced recovery<sup>20</sup> PTSD (post-traumatic stress disorder),<sup>15 20</sup>  
4  
5 catastrophizing,<sup>21</sup> kinesiophobia<sup>22-24</sup>, stress-response<sup>25</sup> are factors  
6  
7  
8 associated with the risk of persistent complaints. A trajectory system has  
9  
10 been proposed by Sterling et al {Sterling, 2011 #978} including 4 groups from  
11  
12 no pain/disability to severe pain/disability, which needs further validation. New  
13  
14 subgroups in the WAD. It is generally agreed upon, that there is a need for  
15  
16 studies confirming and validating prognostic models and a need for improved  
17  
18 models after acute WAD {Sterling, 2011 #2231}.

19  
20  
21  
22  
23  
24  
25  
26  
27  
28  
29 Other studies have found post-traumatic stress,<sup>15</sup> the presence of  
30  
31 sensitization<sup>36</sup> and neck pain and headache intensities to be predictive of  
32  
33 chronic neck disability 1 year after injury.<sup>10 37</sup> These findings are consistent  
34  
35 with the present results. Expectations for recovery{Holm, 2008 #804},  
36  
37 perceived injustice after the accident{Sullivan, 2012 #2680}. Reduced Active  
38  
39 neck mobility has been of importance in some, but not a majority of  
40  
41 prospective studies. {Hendriks, 2005 #193}. We are rather convinced of its  
42  
43 prognostic value, reaching as stand-alone test an area under the ROC curve  
44  
45 of impressive 0.79 (CI95 0.75:0.85) in this multicenter study predicting 1-year  
46  
47 work disability.  
48  
49  
50  
51  
52  
53  
54  
55  
56  
57  
58  
59  
60

**Conclusion**

The risk assessment score is applicable and inexpensive. Early identification of whiplash-exposed persons at risk is important for planning future treatment in scientific studies. Further studies are needed, however the risk assessment score might in the future as well be introduced as a tool for the individual guidance and management of the patient. Application of the risk assessment score may be a valuable alternative to the present WAD grading system in predicting work disability and pain and certain psychosocial parameters after neck injury. Furthermore, a bio-psychosocial risk assessment could be applied in other acute conditions bearing a risk of long-term development of other chronic dysfunctional pain conditions.

**Acknowledgements**

Participants were recruited with the help of the staff at the emergency units at hospitals in the 4 former counties of Viborg, Aarhus, Vejle and Funen during the enrolment period. Statistical consulting was provided from Dept. of Statistics, University of Southern Denmark on designing the study. Financial support was provided by an unrestricted grant from The Danish Insurance Association.

*Stratification method for whiplash injuries*

1  
2  
3  
4  
5  
6  
7  
8  
9  
10  
11  
12  
13  
14  
15  
16  
17  
18  
19  
20  
21  
22  
23  
24  
25  
26  
27  
28  
29  
30  
31  
32  
33  
34  
35  
36  
37  
38  
39  
40  
41  
42  
43  
44  
45  
46  
47  
48  
49  
50  
51  
52  
53  
54  
55  
56  
57  
58  
59  
60

For peer review only

*Stratification method for whiplash injuries*

1  
2  
3 Appendix

4  
5 Legends

6  
7  
8 Figure 1. Flowchart for the Whiplash study.

9  
10  
11 Figure 2a. Risk Strata and Number of Sick-listed Days during First Year after  
12  
13 Whiplash Injury

14  
15 Figure 2b. One Year Recovery from Whiplash Injury in Risk Strata

16  
17 Figure 3a-c. Initial Numeric Rating of Work Related Issues in Risk Strata.

18  
19 Figure 3 a. Expecting problems managing ones job/education in 6 weeks.

20  
21 Figure 3b. Likelihood of being back to work/education in 6 weeks

22  
23 Figure 3c. Evaluation of the physical job requirement of current or most  
24  
25 recent job/education

26  
27 Figure 4. The Impact of Event Scale with subscales of Intrusion and  
28  
29 Avoidance shown in risk strata.

30  
31 Figure 5 a-e. Pressure algometry in the neck and head and remote from  
32  
33 injury in risk strata. PPT pressure pain tolerance threshold and PPDT  
34  
35 pressure pain detection threshold (kilo Pascal, Mean  $\pm$  SEM).

36  
37 Figure S1 (supplementary) ROC curve of individual risk factors and the  
38  
39 Whiplash Risk Assessment Score.

40  
41 Figure S2 (supplementary) Total Palpation Score in Risk strata in acute  
42  
43 whiplash patients

*Stratification method for whiplash injuries*

1  
2  
3  
4  
5  
6  
7  
8  
9  
10  
11  
12  
13  
14  
15  
16  
17  
18  
19  
20  
21  
22  
23  
24  
25  
26  
27  
28  
29  
30  
31  
32  
33  
34  
35  
36  
37  
38  
39  
40  
41  
42  
43  
44  
45  
46  
47  
48  
49  
50  
51  
52  
53  
54  
55  
56  
57  
58  
59  
60

For peer review only

## References

1. Brandsborg B, Dueholm M, Nikolajsen L, et al. A prospective study of risk factors for pain persisting 4 months after hysterectomy. *Clin J Pain* 2009;25:263-8.
2. Nikolajsen L, Brandsborg B, Lucht U, et al. Chronic pain following total hip arthroplasty: a nationwide questionnaire study. *Acta Anaesthesiol Scand* 2006;50:495-500.
3. Aasvang EK, Gmaehle E, Hansen JB, et al. Predictive risk factors for persistent postherniotomy pain. *Anesthesiology* 2010;112:957-69.
4. Kehlet H, Jensen TS, Woolf CJ. Persistent postsurgical pain: risk factors and prevention. *Lancet* 2006;367:1618-25.
5. Nikolajsen L, Ilkjaer S, Christensen JH, et al. Pain after amputation. *Br J Anaesth* 1998;81:486.
6. Rasmussen BK. Migraine and tension-type headache in a general population: precipitating factors, female hormones, sleep pattern and relation to lifestyle. *Pain* 1993;53:65-72.
7. Galasko CSB, Murray PM, Pitcher M, et al. Neck sprains after road traffic accidents: a modern epidemic. *Injury* 1993;24:155-57.

- 1  
2  
3  
4  
5 8. Kongsted A, Leboeuf-Yde C. The Nordic back pain subpopulation program:  
6  
7 course patterns established through weekly follow-ups in patients treated for  
8  
9 low back pain. *Chiropr Osteopat* 2010;18:2.
- 10  
11  
12 9. Spitzer WO, Skovron ML, Salmi LR, et al. Scientific monograph of the  
13  
14 Quebec Task Force on Whiplash-Associated Disorders: redefining 'Whiplash'  
15  
16 and it's management. *Spine* 1995;20:1S-73S.
- 17  
18  
19  
20 10. Williams M, Williamson E, Gates S, et al. A systematic literature review of  
21  
22 physical prognostic factors for the development of Late Whiplash Syndrome.  
23  
24  
25  
26  
27 *Spine* 2007;32:E764-80.
- 28  
29  
30 11. Kasch H, Qerama E, Kongsted A, et al. Deep muscle pain, tender points  
31  
32 and recovery in acute whiplash patients: a 1-year follow-up study. *Pain*  
33  
34  
35 2008;140:65-73.
- 36  
37  
38 12. Kasch H, Stengaard-Pedersen K, Arendt-Nielsen L, et al. Pain thresholds  
39  
40 and tenderness in neck and head following acute whiplash injury: a  
41  
42 prospective study. *Cephalalgia* 2001;21:189-97.
- 43  
44  
45 13. Sterling M. Differential development of sensory hypersensitivity and a  
46  
47 measure of spinal cord hyperexcitability following whiplash injury. *Pain*  
48  
49  
50 2010;150:501-6.
- 51  
52  
53 14. Koelbaek Johansen M, Graven-Nielsen T, Schou-Olesen A, et al.  
54  
55  
56  
57 Generalised muscular hyperalgesia in chronic whiplash syndrome. *Pain*  
58  
59  
60 1999;83:229-34.

15. Sterling M, Hendrikz J, Kenardy J. Similar factors predict disability and posttraumatic stress disorder trajectories after whiplash injury. *Pain* 2011.
16. Gottrup H, Andersen J, Arendt-Nielsen L, et al. Psychophysical examination in patients with post-mastectomy pain. *Pain* 2000;87:275-84.
17. Aasvang E, Kehlet H. Chronic postoperative pain: the case of inguinal herniorrhaphy. *Br J Anaesth* 2005;95:69-76.
18. Kasch H, Bach FW, Jensen TS. Handicap after acute whiplash injury: a 1-year prospective study of risk factors. *Neurology* 2001;56:1637-43.
19. Kasch H, Qerama E, Kongsted A, et al. The risk assessment score in acute whiplash injury predicts outcome and reflects biopsychosocial factors. *Spine (Phila Pa 1976)* 2011;36:S263-7.
20. Kongsted A, Qerama E, Kasch H, et al. Education of patients after whiplash injury: is oral advice any better than a pamphlet? *Spine (Phila Pa 1976)* 2008;33:E843-8.
21. Kongsted A, Qerama E, Kasch H, et al. Neck collar, "act-as-usual" or active mobilization for whiplash injury? A randomized parallel-group trial. *Spine (Phila Pa 1976)* 2007;32:618-26.
22. Kasch H, Qerama E, Kongsted A, et al. Clinical assessment of prognostic factors for long-term pain and handicap after whiplash injury: a 1-year prospective study. *Eur J Neurol* 2008;15:1222-30.



- 1  
2  
3  
4  
5 23. Collins SL, Moore RA, McQuay HJ. The visual analogue scale: what is  
6  
7 moderate pain in millimetres? *Pain* 1997;72:95-97.  
8  
9  
10 24. Dworkin RH, Turk DC, Wyrwich KW, et al. Interpreting the clinical  
11  
12 importance of treatment outcomes in chronic pain clinical trials: IMMPACT  
13  
14 recommendations. *J Pain* 2008;9:105-21.  
15  
16  
17 25. Horowitz M WNAW. Impact of Event Scale: a measure of subjective  
18  
19 stress. *Psychosom Med* 1979;41:209-18.  
20  
21  
22 26. Kasch H, Stengaard-Pedersen K, Arendt-Nielsen L, et al. Headache, neck  
23  
24 pain, and neck mobility after acute whiplash injury: a prospective study. *Spine*  
25  
26 (Phila Pa 1976) 2001;26:1246-51.  
27  
28  
29 27. Wolfe F, Smythe HA, Yunus MB, et al. The American College of  
30  
31 Rheumatology 1990 Criteria for the Classification of Fibromyalgia. Report of  
32  
33 the Multicenter Criteria Committee. *Arthritis Rheum* 1990;33:160-72.  
34  
35  
36 28. Bunketorp L, Lindh M, Carlsson J, et al. The perception of pain and pain-  
37  
38 related cognitions in subacute whiplash-associated disorders: its influence on  
39  
40 prolonged disability. *Disability and rehabilitation* 2006;28:271-9.  
41  
42  
43 29. Jensen K. Quantification of tenderness by palpation and use of pressure  
44  
45 algometers. *Advances in Pain Research and Therapy*. New York: Raven  
46  
47 Press, 1990:165-81.  
48  
49  
50  
51  
52  
53  
54  
55  
56  
57  
58  
59  
60

- 1  
2  
3  
4  
5 30. Bendtsen L, Jensen R, Jensen NK, Olesen J. Pressure-controlled  
6  
7 palpation: a new technic which increases the reliability of manual palpation.  
8  
9 Cephalalgia 1995;15:205-10.  
10  
11  
12 31. Pedler A, Sterling M. Assessing Fear-Avoidance Beliefs in Patients With  
13  
14 Whiplash-Associated Disorders: A Comparison of 2 Measures. Clin J Pain  
15  
16 2011.  
17  
18  
19  
20 32. Kivioja J, Jensen I, Lindgren U. Neither the WAD-classification nor the  
21  
22 Quebec Task Force follow-up regimen seems to be important for the outcome  
23  
24 after a whiplash injury. A prospective study on 186 consecutive patients. Eur  
25  
26 Spine J 2008;17:930-5.  
27  
28  
29  
30 33. Carstensen TB, Frosthalm L, Oernboel E, et al. Post-trauma ratings of  
31  
32 pre-collision pain and psychological distress predict poor outcome following  
33  
34 acute whiplash trauma: a 12-month follow-up study. Pain 2008;139:248-59.  
35  
36  
37  
38 34. Rivest K, Cote JN, Dumas JP, et al. Relationships between pain  
39  
40 thresholds, catastrophizing and gender in acute whiplash injury. Man Ther  
41  
42 2010;15:154-9.  
43  
44  
45  
46 35. Buitenhuis J, Jaspers JP, Fidler V. Can kinesiophobia predict the duration  
47  
48 of neck symptoms in acute whiplash? Clin J Pain 2006;22:272-7.  
49  
50  
51  
52 36. Kongsted A, Bendix T, Qerama E, et al. Acute stress response and  
53  
54 recovery after whiplash injuries. A one-year prospective study. Eur J Pain  
55  
56 2008;12:455-63.  
57  
58  
59  
60

- 1  
2  
3  
4  
5 37. Sterling M, Carroll LJ, Kasch H, et al. Prognosis Following Whiplash  
6  
7 Injury: Where to From Here? Spine (Phila Pa 1976) 2011.  
8  
9  
10 38. Sterling M, Jull G, Kenardy J. Physical and psychological factors maintain  
11  
12 long-term predictive capacity post-whiplash injury. Pain 2006;122:102-8.  
13  
14  
15 39. Scholten-Peeters GGM, Verhagen AP, Bekkering GE, et al. Prognostic  
16  
17 factors of whiplash-associated disorders: a systematic review of prospective  
18  
19 cohort studies. Pain 2003;104:303-22.  
20  
21  
22  
23 40. Holm LW, Carroll LJ, Cassidy JD, et al. Expectations for recovery  
24  
25 important in the prognosis of whiplash injuries. PLoS Med 2008;5:e105.  
26  
27  
28  
29 41. Sullivan MJ, Scott W, Trost Z. Perceived injustice: a risk factor for  
30  
31 problematic pain outcomes. The Clinical journal of pain 2012;28:484-8.  
32  
33  
34  
35 42. Hendriks EJM, Scholten-Peeters GGM, van der Windt D, et al. Prognostic  
36  
37 factors for poor recovery in acute whiplash patients. Pain 2005;114:408-16.  
38  
39  
40  
41  
42  
43  
44  
45  
46  
47  
48  
49  
50  
51  
52  
53  
54  
55  
56  
57  
58  
59  
60

| The Danish Whiplash Study Group Risk Score |             |     |         |      |         |   |         |   |         |   |      |
|--------------------------------------------|-------------|-----|---------|------|---------|---|---------|---|---------|---|------|
| Points                                     | 0           | 1   | 2       | 3    | 4       | 5 | 6       | 7 | 8       | 9 | 10   |
| CROM                                       | >280        |     | 261-280 |      | 241-260 |   | 221-240 |   | 200-220 |   | <200 |
| Neck/Head VAS                              | 0-2         | 3-4 |         |      | 5-8     |   | 9-10    |   |         |   |      |
| Number of non-pain symptoms                |             | 3-5 |         | 6-11 |         |   |         |   |         |   |      |
| Stratum 1                                  | = 0 points  |     |         |      |         |   |         |   |         |   |      |
| Stratum 2                                  | = 1-3 pts   |     |         |      |         |   |         |   |         |   |      |
| Stratum 3                                  | = 4-6 pts   |     |         |      |         |   |         |   |         |   |      |
| Stratum 4                                  | = 7-9 pts   |     |         |      |         |   |         |   |         |   |      |
| Stratum 5                                  | = 10-12 pts |     |         |      |         |   |         |   |         |   |      |
| Stratum 6                                  | = 13-15 pts |     |         |      |         |   |         |   |         |   |      |
| Stratum 7                                  | = 16-19 pts |     |         |      |         |   |         |   |         |   |      |

only

1  
2  
3  
4  
5  
6  
7  
8  
9  
10  
11  
12  
13  
14  
15  
16  
17  
18  
19  
20  
21  
22  
23  
24  
25  
26  
27  
28  
29  
30  
31  
32  
33  
34  
35  
36  
37  
38  
39  
40  
41  
42  
43  
44  
45  
46  
47

1  
2  
3  
4  
5  
6  
7  
8  
9  
10  
11  
12  
13  
14  
15  
16  
17  
18  
19  
20  
21  
22  
23  
24  
25  
26  
27  
28  
29  
30  
31  
32  
33  
34  
35  
36  
37  
38  
39  
40  
41  
42  
43  
44  
45  
46  
47  
48  
49  
50  
51  
52  
53  
54  
55  
56  
57  
58  
59  
60

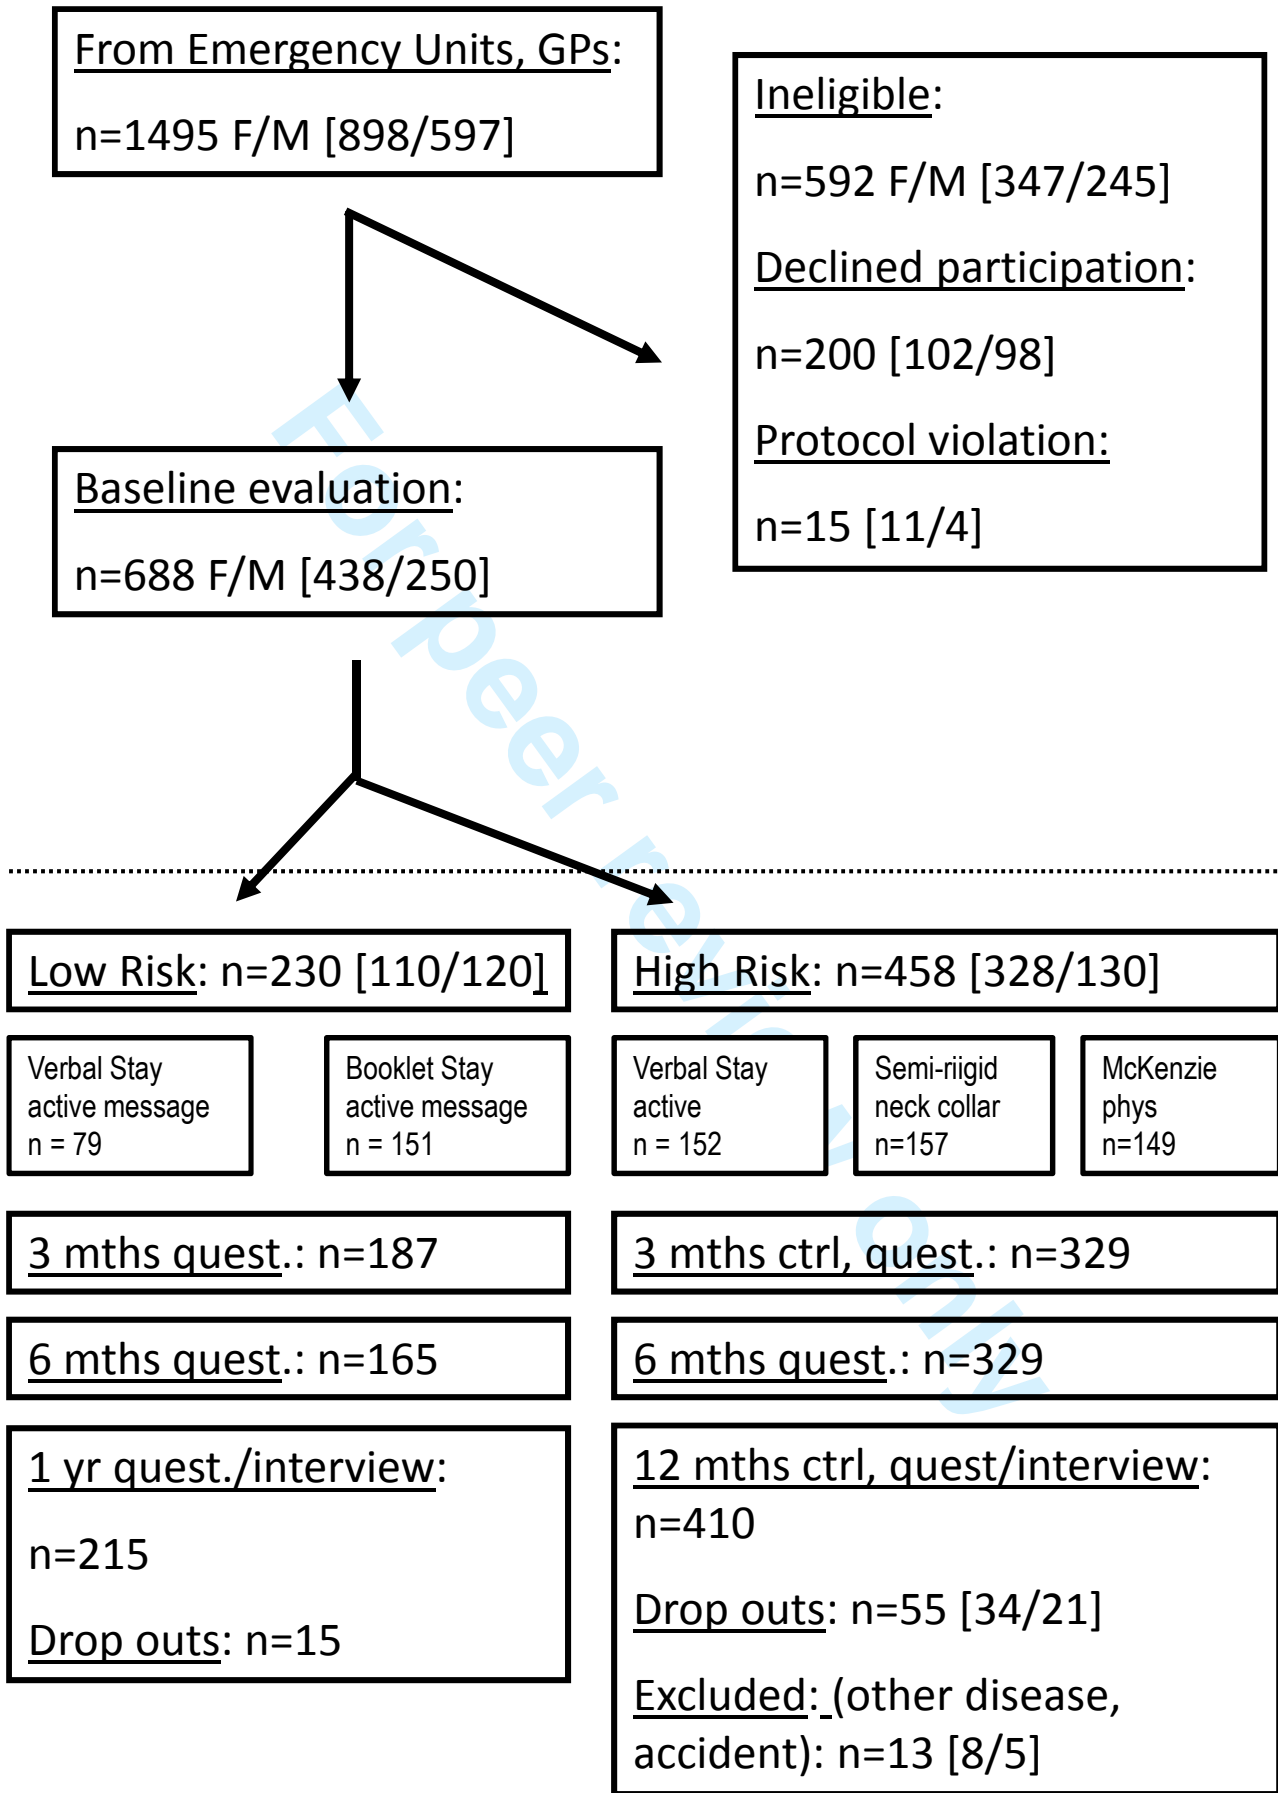

# Stratification and Sick Days during 1st Year

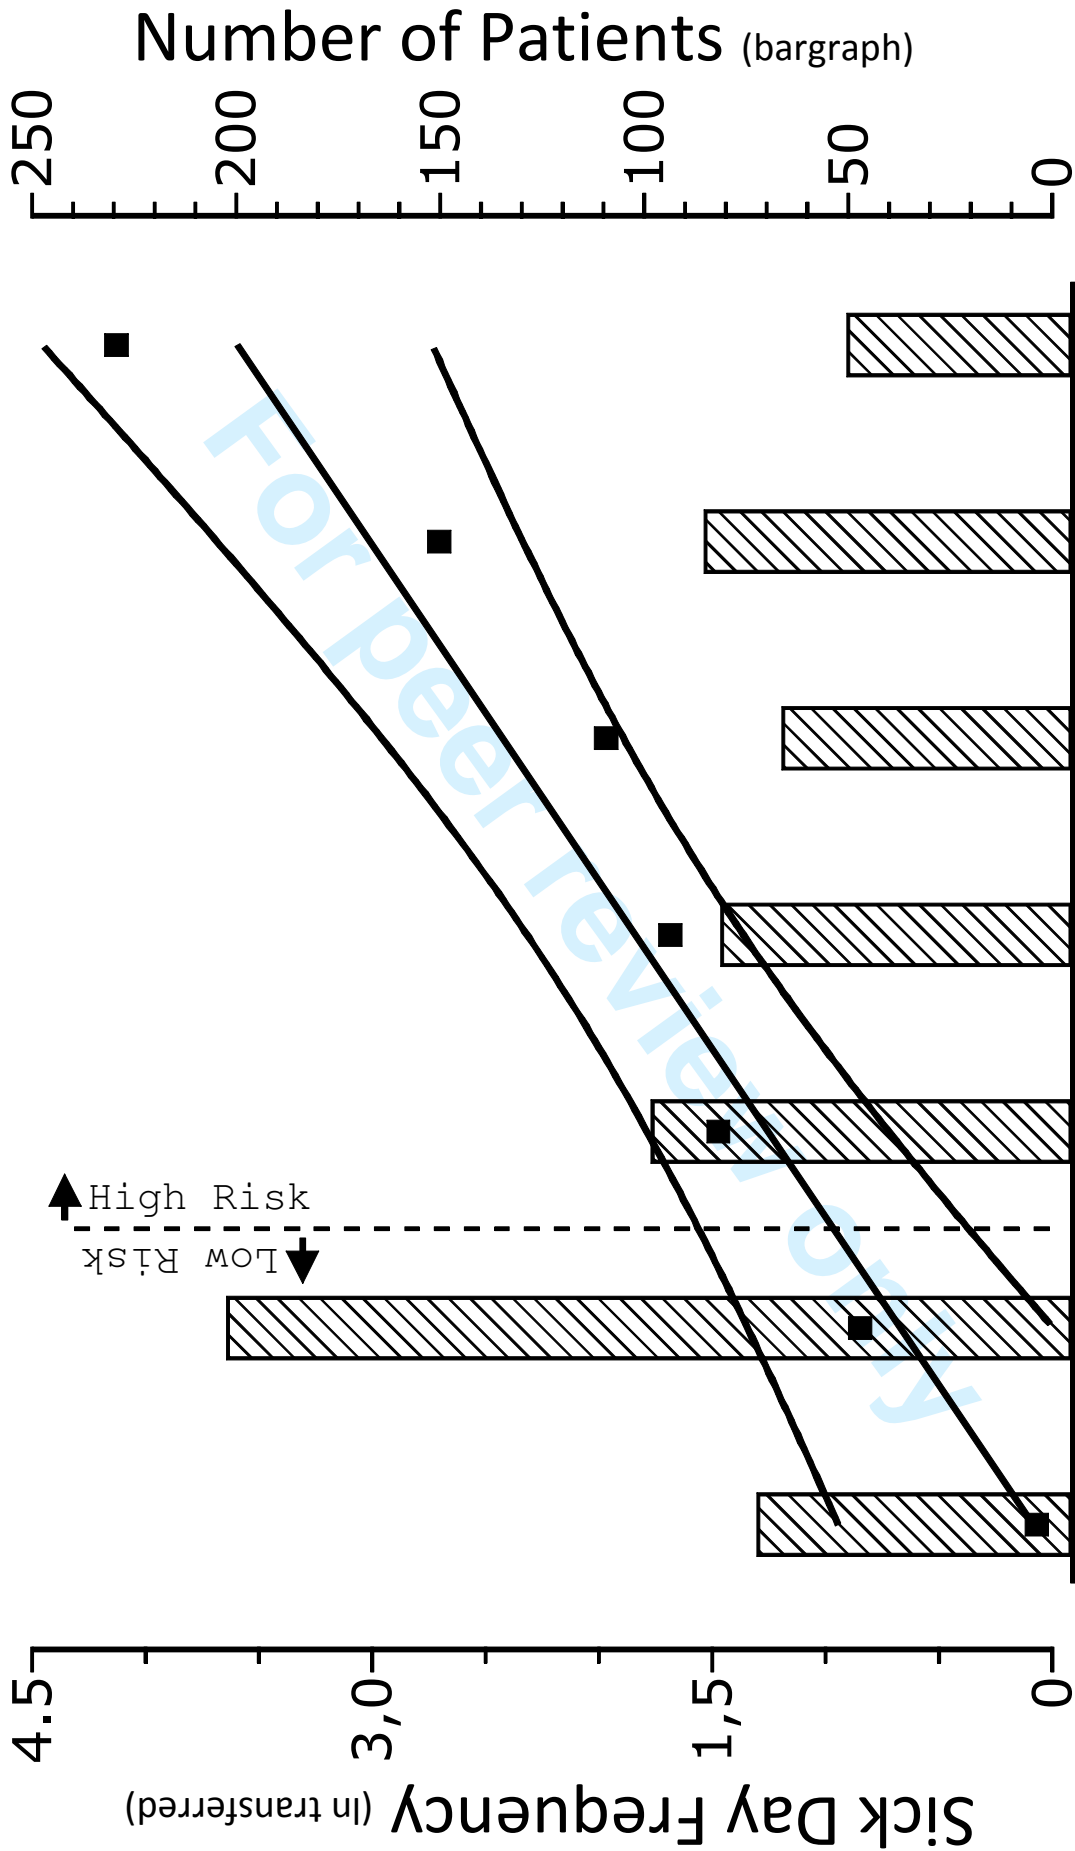

1  
2  
3  
4  
5  
6  
7  
8  
9  
10  
11  
12  
13  
14  
15  
16  
17  
18  
19  
20  
21  
22  
23  
24  
25  
26  
27  
28  
29  
30  
31  
32  
33  
34  
35  
36  
37  
38  
39  
40  
41  
42  
43  
44  
45  
46  
47  
48  
49  
50  
51  
52  
53  
54  
55  
56  
57  
58  
59  
60

# Stratified whiplash patients and 1-year recovery



Fig. 3a

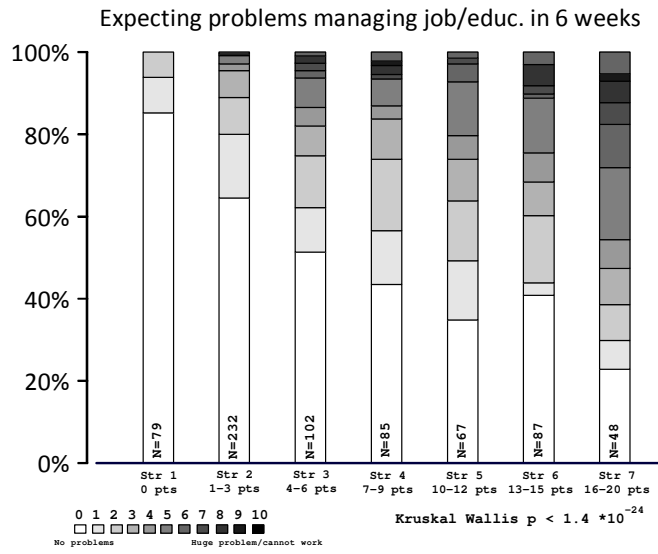

Fig. 3b

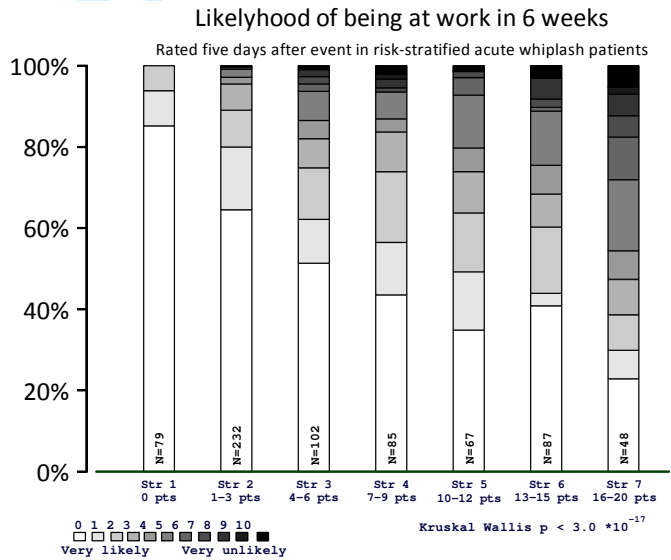

Fig. 3c





# Impact of Event in 7 Risk Strata

In Acute Whiplash Injury

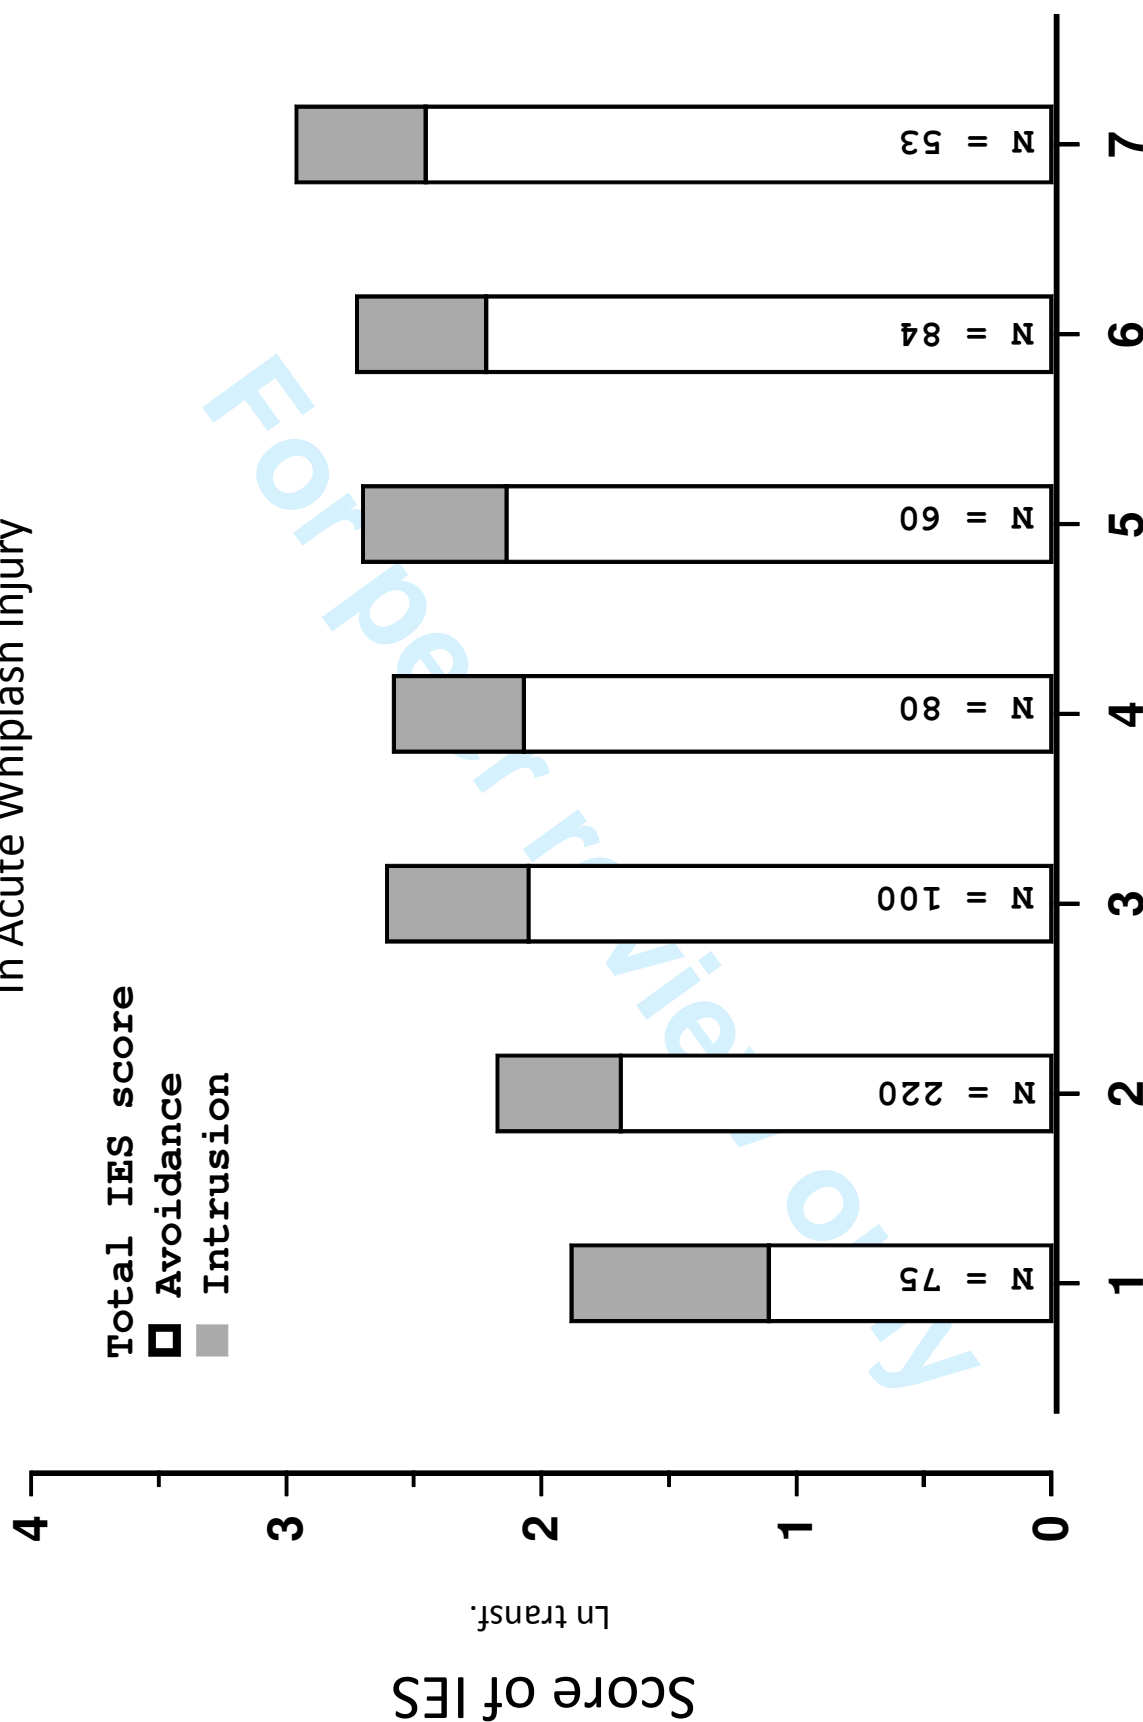

Risk strata 1-7

Kruskal-Wallis,  $p < 6.2 \times 10^{-6}$

Total IES score

Avoidance

Intrusion

Score of IES

Ln transf.

# Muscle and Joint Pain in Strata

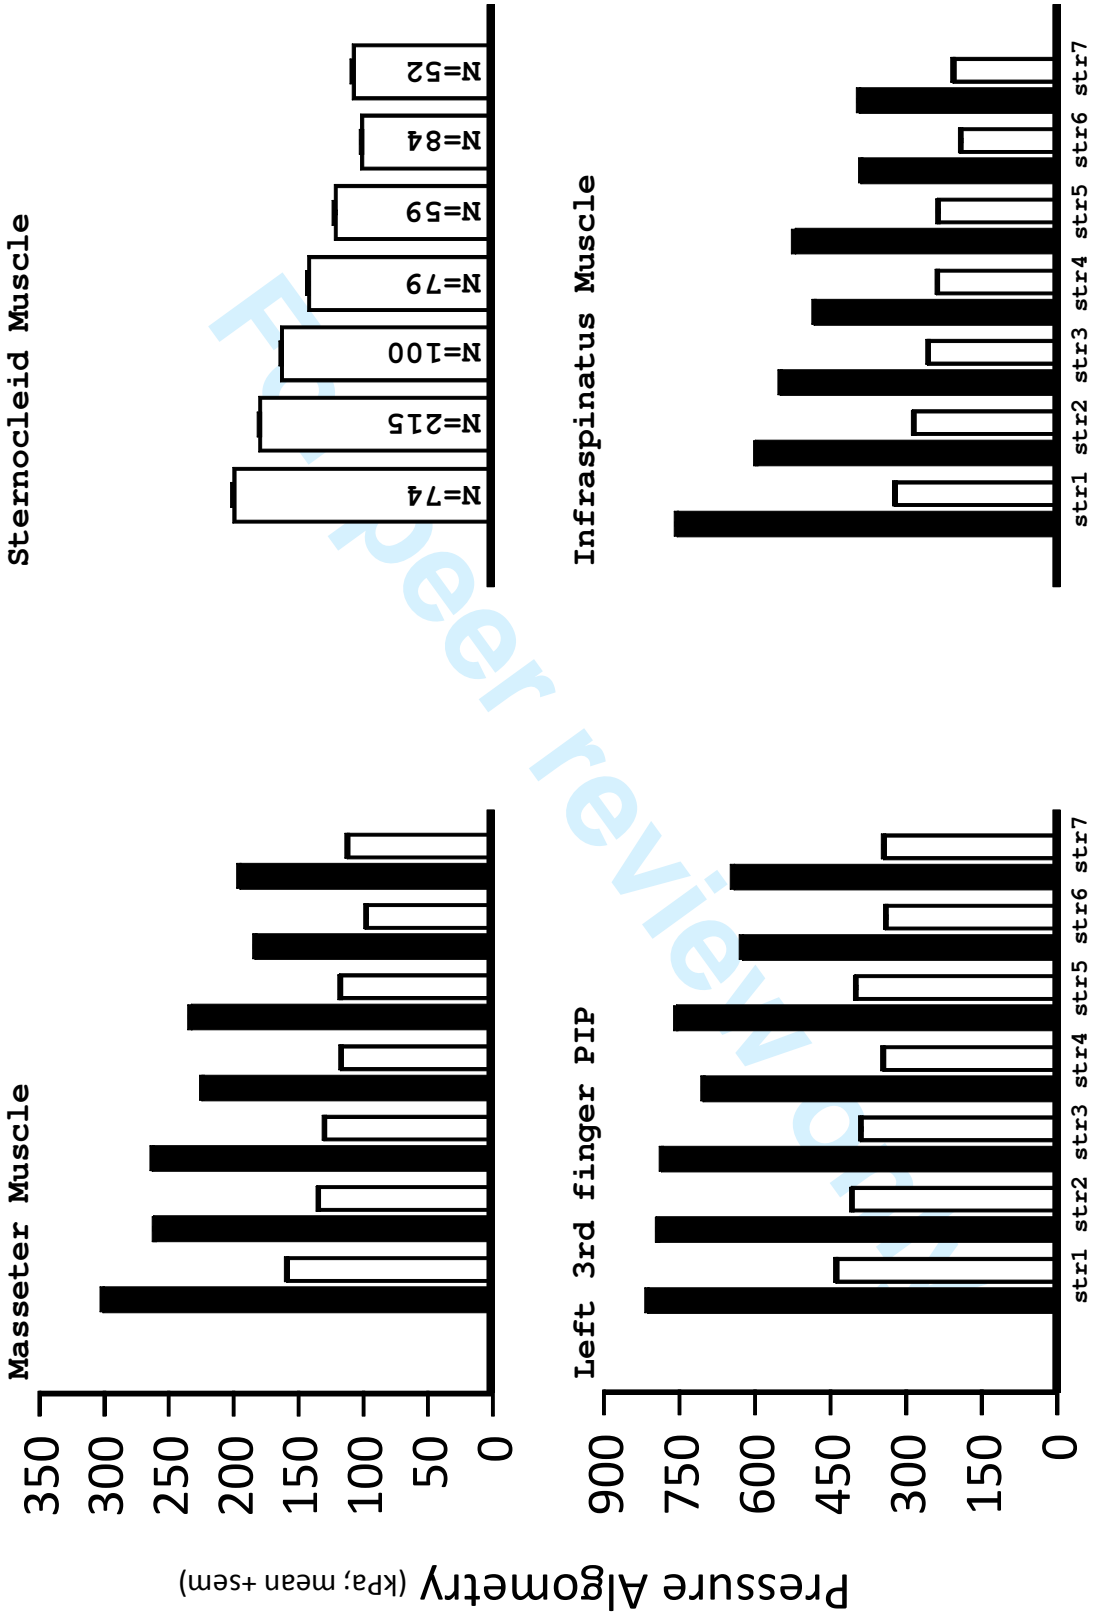

Kruskal Wallis  $p < 0.00001$

■ Pain Tolerance Threshold  
 □ Pain Detection Threshold

Supplementary figure 1. Receiver Operating Characteristics (ROC) curve. One Year Disability

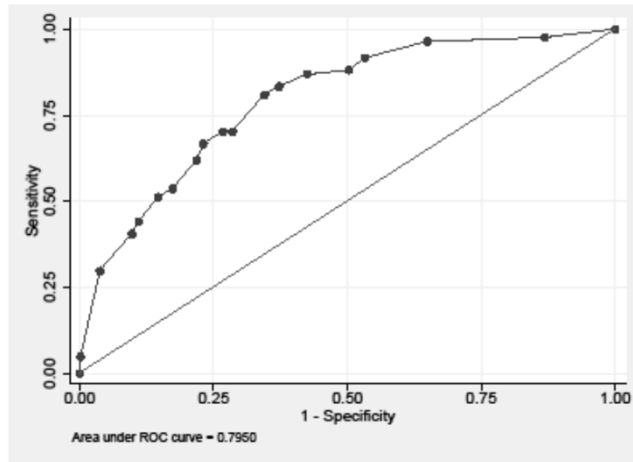

S1 A. Total Risk Score

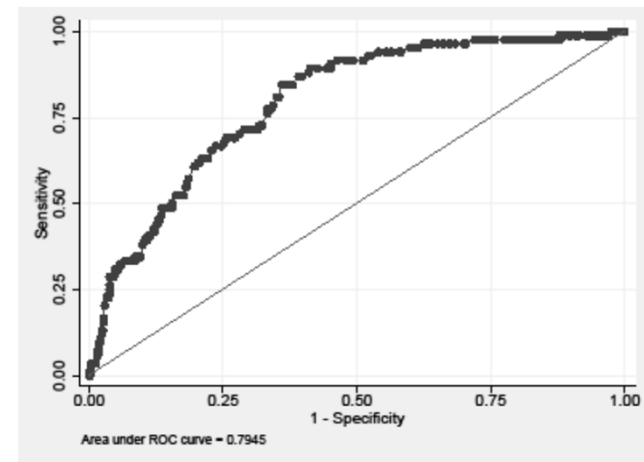

S1 B. CROM (negative)

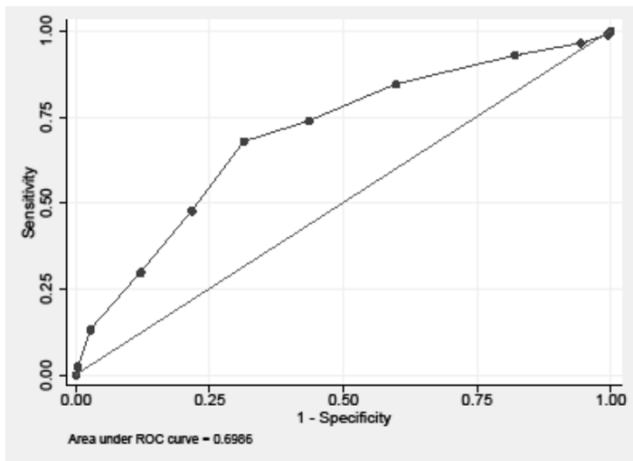

S1 C. Max VAS Neckpain/Headache

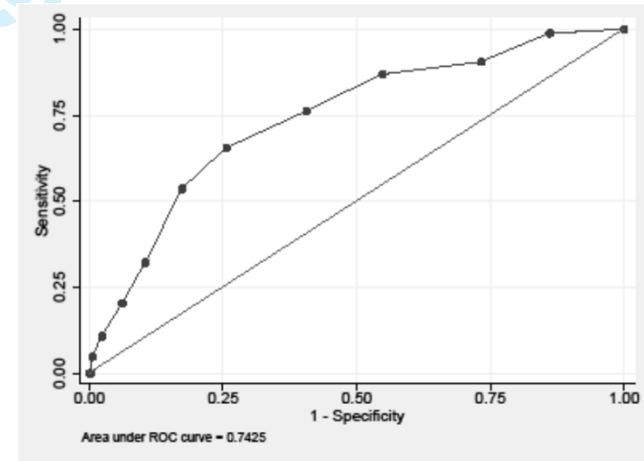

S1 D. Number of Non-Painful Symptoms

1  
2  
3  
4  
5  
6  
7  
8  
9  
10  
11  
12  
13  
14  
15  
16  
17  
18  
19  
20  
21  
22  
23  
24  
25  
26  
27  
28  
29  
30  
31  
32  
33  
34  
35  
36  
37  
38  
39  
40  
41  
42  
43  
44  
45  
46  
47

# Muscle Tenderness in Risk Stratified acute Whiplash Patients

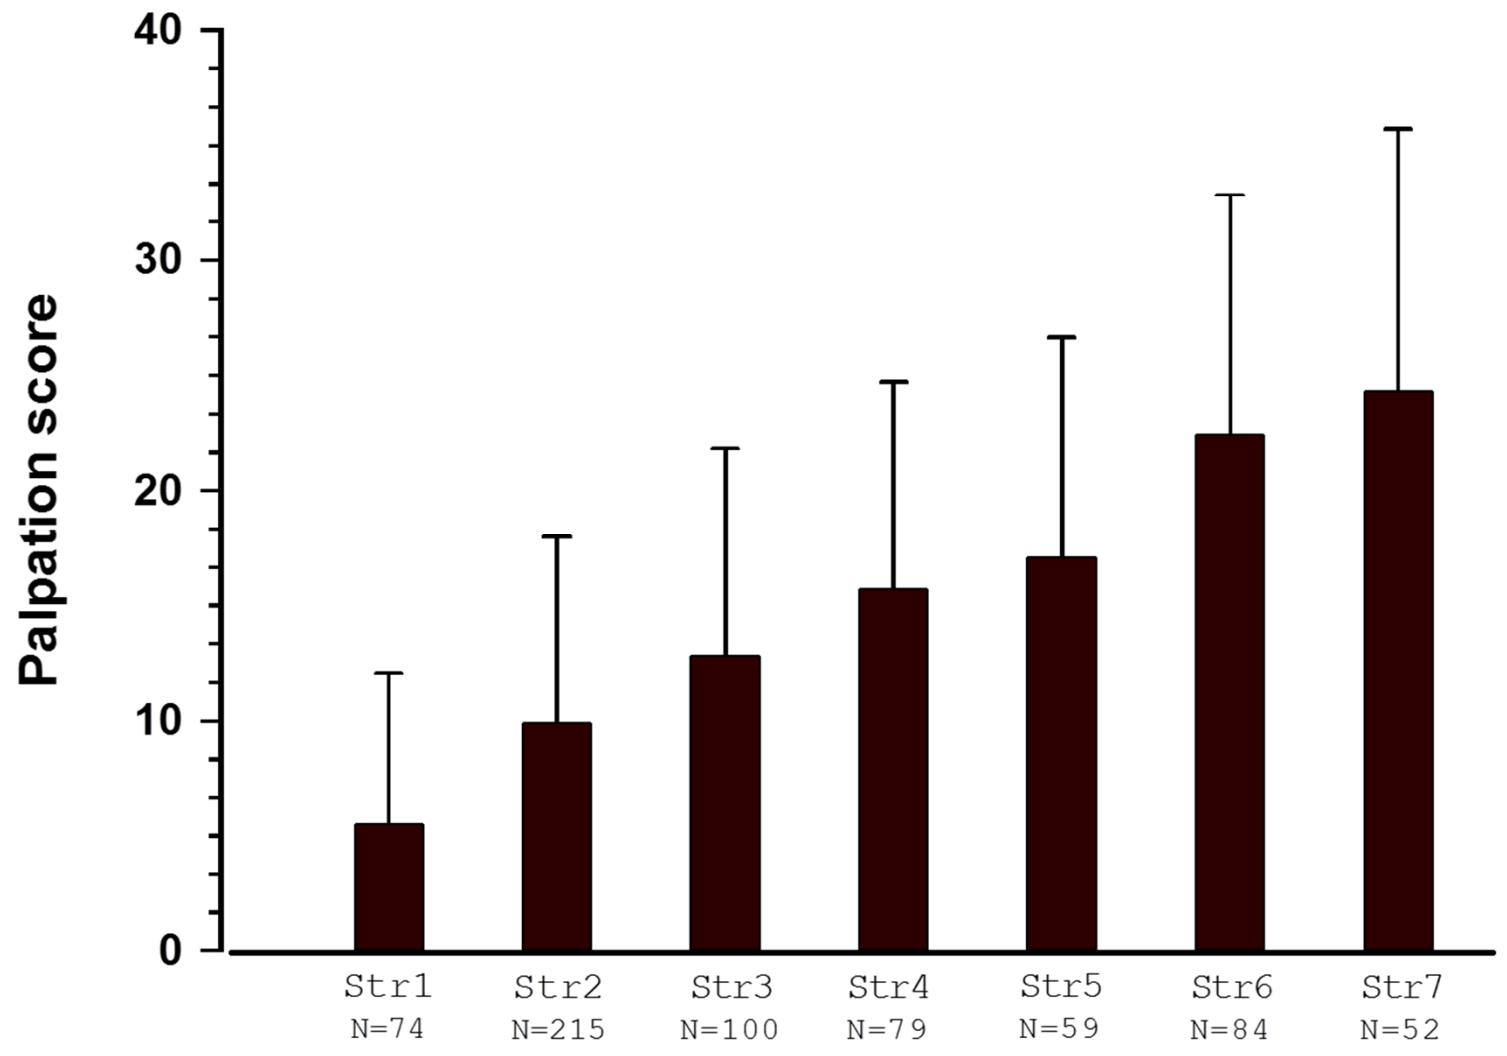

Kruskal Wallis  $P < 4.8 \times 10^{-45}$

1  
2  
3  
4  
5  
6  
7  
8  
9  
10  
11  
12  
13  
14  
15  
16  
17  
18  
19  
20  
21  
22  
23  
24  
25  
26  
27  
28  
29  
30  
31  
32  
33  
34  
35  
36  
37  
38  
39  
40  
41  
42  
43  
44  
45  
46  
47

Supplementary Table 1. Description of strata in detail

|           | N   | Age<br>(mean) | +/-SD | Gender<br>(F/M) | Likelihood<br>Ratio + | Work Disability       |  | Correctly<br>classified |
|-----------|-----|---------------|-------|-----------------|-----------------------|-----------------------|--|-------------------------|
|           |     |               |       |                 |                       | Likelihood<br>Ratio - |  |                         |
| stratum 1 | 76  | 35.89         | 11.67 | 41/35           | 1.0000                |                       |  | 13.19%                  |
| stratum 2 | 220 | 34.07         | 11.23 | 130/90          | 1.1247                | 0.1804                |  | 24.33%                  |
| stratum 3 | 100 | 35.36         | 12.21 | 63/37           | 1.7524                | 0.2394                |  | 54.79%                  |
| stratum 4 | 80  | 34.81         | 10.93 | 55/25           | 2.3438                | 0.2910                |  | 67.5%                   |
| stratum 5 | 61  | 37.34         | 12.08 | 40/21           | 2.8802                | 0.4337                |  | 75.51%                  |
| stratum 6 | 84  | 31.52         | 9.79  | 65/19           | 3.4949                | 0.5719                |  | 80.85%                  |
| stratum 7 | 53  | 36.79         | 12.29 | 37/16           | 7.8373                | 0.7301                |  | 87.44%                  |
|           |     |               |       |                 |                       | 1.0000                |  | 86.81%                  |

674 patients could be stratified and completed 6-12 months follow-up

*Stratification method for whiplash injuries***Heading at BMJ**

---

**A new stratified risk assessment tool for whiplash injuries predicts recovery**

---

Helge Kasch, MD, PhD Senior Consultant Neurologist<sup>1</sup>); Alice Kongsted, DMSc(Clin Biomech), PhD Senior Research fellow<sup>2</sup>); Erisela Qerama, MD PhD, Consultant Neurophysiologist<sup>3</sup>); Flemming W. Bach, MD DMSc, Clinical Professor of Neurology<sup>4</sup>); Tom Bendix, MD DMSc, Clinical Professor of Rheumatology<sup>5</sup>); Troels Staehelin Jensen MD DMSc, Clinical Professor of Neurology<sup>1</sup>)

1) The Danish Pain Research Center, Dept. of Neurology, Aarhus University Hospital, Noerrebrogade 44; DK-8000 Aarhus, Denmark

~~2) [Department of Research, Spine Center of Southern Denmark, Hospital Lillebaelt, Institute of Regional Health Research, University of Southern Denmark](#)~~

~~2) [Nordic Institute of Chiropractic and Clinical Biomechanics part of Clinical Locomotion Network, University of Southern Denmark, Odense, Denmark](#)~~

3) Dept. of Neurophysiology, Aarhus University Hospital, Noerrebrogade 44; DK-8000 Aarhus, Denmark

*Stratification method for whiplash injuries*

4) Dept. of Neurology, Aarhus University Hospital, Aalborg Hospital,  
Ladegaardsgade 5 DK-9100 Aalborg, Denmark

5) Copenhagen Spine Center, Glostrup Hospital, Ndr. Ringvej 57, 2600-  
DK, Glostrup, Denmark

Contact: Helge Kasch, Senior Consultant Neurologist, PhD. The Headache  
Clinic and Danish Pain Research Center, Dept. of Neurology, Aarhus  
University Hospital, Noerrebrogade 44, DK-8000 Aarhus DENMARK. Email:  
[helge.kasch@dadlnet.dk](mailto:helge.kasch@dadlnet.dk), Tel.: + 45 8949 3333; Fax: +45 8949 3300

**Key Words**

Whiplash Injuries, Prognosis, Neck Pain, Headache, Range-of-Motion, Risk  
Factors

**Number of figures: 5 + 1 supplemental figure S1**

**Number of tables: 1**

**Number of words count: 3038 (incl. acknowledgements)**

**Correspondence to**

Dr. Helge Kasch, Dept. of Neurology, Aarhus University Hospital,  
Noerrebrogade 44, DK-8000 Aarhus, Denmark. Email

[helge.kasch@dadlnet.dk](mailto:helge.kasch@dadlnet.dk)

Fax: 0045 89493300

1  
2  
3  
4  
5  
6  
7  
8  
9  
10  
11  
12  
13  
14  
15  
16  
17  
18  
19  
20  
21  
22  
23  
24  
25  
26  
27  
28  
29  
30  
31  
32  
33  
34  
35  
36  
37  
38  
39  
40  
41  
42  
43  
44  
45  
46  
47  
48  
49  
50  
51  
52  
53  
54  
55  
56  
57  
58  
59  
60

*Stratification method for whiplash injuries*

For peer review only



1  
2  
3  
4  
5  
6  
7  
8  
9  
10  
11  
12  
13  
14  
15  
16  
17  
18  
19  
20  
21  
22  
23  
24  
25  
26  
27  
28  
29  
30  
31  
32  
33  
34  
35  
36  
37  
38  
39  
40  
41  
42  
43  
44  
45  
46  
47  
48  
49  
50  
51  
52  
53  
54  
55  
56  
57  
58  
59  
60

*Stratification method for whiplash injuries*

**Abstract: (268 words)**

Objectives

This paper presents an initial stratification of acute whiplash patients into 7 risk-strata in relation to a 1-year outcome.

Design

The design applied was an observational prospective study of risk factors embedded in a randomized controlled study.

Setting

Acute whiplash patients from the units and general practitioners in 4 Danish counties were referred to two research centers.

Participants

During a 2-year inclusion period, acute consecutive whiplash-injured (age 18-70 y, rear- or frontal-end MVA, WAD grades I-III symptoms within 72 h, examination prior to 10 days post-injury, capable of written/spoken Danish, without: other injuries/fractures, pre-existing significant somatic/psychiatric disorder, drug/alcohol abuse, and previous significant pain/headache). Six-hundred and eighty-eight (438 F, 250 M) participants were interviewed and examined after 5 days, 605 completed after 1 year.

A risk score which included items of initial neck-pain/headache intensity, number-of non-painful complaints, and active neck mobility was applied.

*Stratification method for whiplash injuries*

One-year primary outcome parameter was work disability, ~~and secondary were: number of sick-listing days, severe headache, neck-pain, neck disability.~~

### Results

Risk score and number of sick-listing days were related ( $p < 0.0001$ ). In stratum 1 less than four percent, but in stratum 7 sixty-eight percent were work disabled after 1 year. Bio-psychosocial factors were significantly segregated from the first assessment by risk strata, neck and jaw muscle soreness (Kruskal-Wallis,  $p < 0.0001$ ), pressure algometry ( $p < 0.0001$ ), McGill pain questionnaire parameters ( $p < 0.0001$ ), impact of event ( $p < 0.0006$ ), and early work assessment ( $p < 0.0001$ ).

### Conclusion

Application of the risk assessment score and use of the risk strata system may be fruitfully applied in future studies and may be considered a valuable tool to assess return to work following injuries, however further studies are needed.

### Objective

~~The aim was to create a risk model by incorporating various initial symptoms and signs and relate them to the 1-year status on workability and other measures of disability or recovery.~~

### *Stratification method for whiplash injuries*

#### **Design**

The design applied was an observational prospective study. During a 2-year inclusion period, 688 acute consecutive whiplash-injured patients were interviewed and examined after 5 days post-injury by a study nurse. A risk score (from 0-19), based on a developed and validated score system which included items of initial neck pain/headache intensity, number of non-painful complaints, and active neck mobility, was applied. All participants received mailed questionnaires after three, six, and twelve months. After a median of 11, 109, and 380 days medical examination of high-risk patients (a score from 4-20) and 41 randomized low-risk (a score from 0-3) patients was carried out. One-year main outcome parameter was work disability. Secondary outcome parameters were: number of sick-listing days, severe headache, neck pain, and neck disability. This paper presents an initial stratification into 7 risk-strata in relation to a 1-year outcome.

#### **Results**

Bio-psychosocial factors were significantly segregated from the first assessment by risk strata, neck and jaw muscle soreness (Kruskal-Wallis,  $p < 0.0001$ ), pressure algometry ( $p < 0.0001$ ), McGill pain questionnaire parameters ( $p < 0.0001$ ), impact of event ( $p < 0.0006$ ), and early work assessment ( $p < 0.0001$ ). There was a significant relationship between risk score and number of sick-listing days ( $p < 0.0001$ ). In stratum 1 less than 4%

*Stratification method for whiplash injuries*

~~were disabled and in stratum 7 68 % were more or less out of work after 1 year.~~

**Conclusion**

~~Application of the risk assessment score and use of the risk strata system should be considered a valuable tool to assess return to work following injuries and may be beneficial in future studies.~~

1  
2  
3  
4  
5  
6  
7  
8  
9  
10  
11  
12  
13  
14  
15  
16  
17  
18  
19  
20  
21  
22  
23  
24  
25  
26  
27  
28  
29  
30  
31  
32  
33  
34  
35  
36  
37  
38  
39  
40  
41  
42  
43  
44  
45  
46  
47  
48  
49  
50  
51  
52  
53  
54  
55  
56  
57  
58  
59  
60

*Stratification method for whiplash injuries*

**Introduction**

Chronic pain represents a major problem in the Western World with approximately 20% of the adult population suffering ~~more or less~~ from chronic pain. Our ability to deal with these chronic pain conditions is insufficient as it is in various other areas, such as traumatic injuries and pain following surgery or other medical procedures. Identifying patients at risk of developing chronic pain is a prerequisite for establishment of prophylactic initiatives.

When discussing pain following surgery, it has been demonstrated that prior pain intensity, the duration of pain, the type of surgery, the nerve damage during surgery as well as psychological factors, information and the setting and the genetic endowment are of significant importance with respect to the future development and persistence of chronic pain<sup>1-5</sup>. Also regarding musculoskeletal pain conditions, such as headache<sup>6</sup>, cervical sprains<sup>7</sup>, and low back pain conditions,<sup>8</sup> there is an interest in exploring the potential risk factors aligned with persistent pain. The specific type of distortion of the cervical spine, stemming from a so-called *whiplash injury*, in which the neck spine is exposed to a forced extension-flexion trauma, is often followed by a late pain state known as whiplash-associated disorders (WAD).<sup>9 10</sup>

These injuries may be associated with a reduction of the pain threshold to mechanical pressure in the neck muscles<sup>11 12</sup>, a reduction of nociceptive

*Stratification method for whiplash injuries*

flexion reflexes,<sup>13</sup> and an expansion of cutaneously referred pain symptoms following infusion of hypertonic saline into muscles both at the injury site and in areas remote from the injury site.<sup>14</sup> These findings suggest generalized hyper- excitability following a whiplash injury which resolves in patients recovering after injury but persists in patients with ongoing symptoms<sup>2 11 15-17</sup>

Whiplash-associated disorders fall into the categories O-IV according to the Quebec WAD grading<sup>9</sup>. In a previous observation study we found that a risk score based on neck pain, headache, the number of non-painful symptoms, and reduced neck mobility to be associated with a marked risk of reduced recovery<sup>19</sup>

~~The Quebec WAD grading represented a first attempt to better characterize and identify long term consequences after a whiplash injury. However, subsequent studies demonstrated that the Quebec WAD grading was of little value in predicting long term sequelae.<sup>9-18</sup> In a previous observation study we found that neck pain, headache, the number of non-painful symptoms, and reduced neck mobility to be associated with risk of reduced recovery<sup>19</sup>. Also, in accordance with other studies, emotional distress and social factors implicated a risk of reduced recovery<sup>20</sup>. Other studies have demonstrated that PTSD (post-traumatic stress disorder),<sup>15-20</sup> catastrophizing,<sup>21</sup> kinesiophobia~~

*Stratification method for whiplash injuries*

~~<sup>22-24</sup>, stress response <sup>25</sup> are additional factors associated with the risk of persistent complaints. {Sterling, 2011 #2231}~~

~~Based on these observations the objective of this study was to test a stratified risk assessment scoring system for predicting long-term sequelae after a whiplash injury. A risk index was developed in a previous cohort and the predictive capability of seven risk strata tested. {Kasch, 2001 #792;Kasch, 2011 #2297}. In the present study we test if the seven risk strata are useful for prediction of outcome in that second sample. In addition, differences in psychological and social factors across the strata are described.~~

~~Based on these observations, a prospective study was designed to test specifically if the factors neck pain, headache, the number of non-painful symptoms, and reduced neck mobility could be used to establish a stratified risk assessment scoring system for predicting chronicity or long term sequelae {Kasch, 2001 #792;Kasch, 2011 #2297}.~~

*Stratification method for whiplash injuries***Materials and methods****Study overview**

A risk stratification index based on measures of intensity of neck pain and headache, cervical range of motion (CROM), and number of non-painful complaints was developed in a previous sample of whiplash injured seen in an emergency care unit {Kasch, 2001 #792}. Using a pragmatic approach seven risk strata were formed and this stratification was strongly associated with outcome {Kasch, 2011 #2297}.

In the present study these risk strata are tested in another sample enrolled between May 2001 and June 2003. The study is a secondary analysis of two parallel RCTs {Kongsted, 2008 #2238;Kongsted, 2007 #786}. Patients were enrolled within 10 days of a whiplash injury. Those with a low risk stratification index score were randomised to either oral or written advice to act as usual {Kongsted, 2008 #2238} whereas patients with high risk scores were randomised to immobilization (semi-rigid neck collar), active mobilization (McKenzie technique) or the oral recommendation to act as usual {Kongsted, 2007 #786}. (Refer to fig. 1) The oral and written advice were delivered at the day of inclusion. The neck collar and active mobilization interventions involved contact to a physical therapist for a maximum of six weeks. Details about the interventions are reported elsewhere {Kongsted, 2008 #2238;Kongsted, 2007 #786}. No significant differences in treatment effects



*Stratification method for whiplash injuries*

were demonstrated and participants are therefore considered one cohort for the present study. The study was approved by the local ethical committees (The Scientific Committee for The Counties of Vejle and Funen, Project number 20000268) and conducted in accordance with the Helsinki II Declaration.

**Study population**

~~The investigation was conducted as part of a two-center interventional study of patients exposed to a forced extension flexion strain of the cervical spine, carried out at The Danish Pain Research Centre, Department of Neurology, Aarhus University Hospital, and The Danish Back Research Centre, The Odense University Hospital (University of Southern Denmark). The design was a prospective parallel-group trial consisting of three parallel groups. The treatment options were immobilization (semi-rigid neck collar), active mobilization (McKenzie technique) or an oral recommendation to act as usual.<sup>26</sup> In the group of low-risk patients a randomized testing design was applied involving either oral stay active advice or written advice with the same content in a booklet presented to the subject<sup>27</sup>. Collaboration with the emergency units and general practitioners located in the four counties, (the former counties of Vejle, Funen, Aarhus, and Viborg) representing~~

*Stratification method for whiplash injuries*

approximately 1.7 million inhabitants, referred acute whiplash patients to the study. Study enrolment took place between May 2001 and June 2003.

Inclusion criteria were the following:

- age 18-70 years
- exposure to a rear- or frontal-end car accident
- development of whiplash related symptoms within 3 days post injury (WAD grades I-III<sup>9</sup>) and
- an examination to have been performed prior to 10 days after injury.

Exclusion criteria were the following:

- inability of injured individuals to follow written and spoken Danish
- injuries with fractures or dislocations (WAD grade IV)
- additional trauma other than whiplash
- pre-existing significant somatic or psychiatric disease
- known active alcohol abuse.
- known active drug abuse
- and significant headache or neck pain.

Significant past pain conditions were in detail:

- disability pension due to headache

*Stratification method for whiplash injuries*

- neck pain
- shoulder pain or low back pain
- sick leave of more than 3 months past year due to neck pain
- headache, low back pain or shoulder pain condition
- regularly prescribed analgesic medication or other regularly performed interventional treatment for chronic pain condition.

In addition, patients with neck pain or headache of at least 3 on a pain scale from 0 to 10 were excluded.

The study was approved by the local ethical committees (The Scientific Committee for The Counties of Vejle and Funen, Project number 20000268) and conducted in accordance with the Helsinki II Declaration. Each participant, who accepted to be contacted when being examined in the emergency unit or by the general practitioner, received both verbal and written information about the study by the study nurse before giving oral and written consent to participation.

*Stratification method for whiplash injuries*

**Determination of risk status**

An initial evaluation took place after a median of 5 days after injury and was performed by a research nurse. Potential risk factors were combined into a total risk assessment score<sup>28</sup> for each individual patient after being examined at The Headache Clinic and Danish Pain Research Centre.

The scoring was as follows:

Active neck mobility, total CROM, which included the following six movements: flexion, extension, right and left lateral flexion, and right and left rotation<sup>29</sup> (range below 200 = 10 points; 200-220 = 8 points; 221-240 = 6 points; 241-260 = 4 points; 261-280 = 2 points; above 280 = 0 points).

Neck pain and headache were scored on an eleven-box Numeric Rating Scale, using the following score: 0-2 = 0 points; 3-4 = 1 point; 5-8 = 4 points; 9-10 = 6 points. On this scale 0 equaled no pain and 10 equaled the worst imaginable pain.

Number of non-painful complaints (0-2 = 0 points; 3-5 = 1 point; 6-11 = 3 points), where the minimum was no non-painful complaints and the maximum was 11 of 11 possible, pre-identified non-painful complaints (paresthesia,

### *Stratification method for whiplash injuries*

dizziness, vision disturbances, tinnitus, hyperacusis, globulus, fatigue, irritation, concentration disturbances, memory difficulties, sleep disturbances).

The factors included in the risk score were based on earlier studies<sup>19-28,30</sup>.

Fig. S1 (see appendix) shows the ROC curves to determine the sensitivity for the measures: active neck mobility, headache/neck pain and number of non-painful symptoms.

#### **Follow-up assessments**

Questionnaires were filled in at the baseline and after 3, 6, and 12 months after the injury by all participants. The intensity and frequency of headaches, neck pain, and each of the non-painful symptoms were recorded in McGill pain questionnaires and the Impact of Event Questionnaires at each time point. In addition, patients' reporting of previous symptoms, disease, medication, and socio-demographic and injury-related factors were obtained at the baseline of the study.

#### **Clinical assessment**

At the first examination patients underwent a brief physical examination by the study nurse. Active neck mobility (flexion, extension, left and right rotation

*Stratification method for whiplash injuries*

~~and lateral flexion) was assessed with a CROM device as formerly described.<sup>29-31</sup> During neck movement in all six directions the examiner asked the patient whether pain was elicited by the particular movement, and if so, whether pain was localized in the neck area or appeared in a region remote from the neck. Methodical palpation was performed bilaterally at nine sites: 1) the anterior part of the temporal muscle, 2) the posterior part of the temporal muscle, 3) the masseter muscle, 4) the lateral pterygoid muscle, 5) the sternocleid at the mastoid insertion point, 6) the sternocleid at its middle belly, 7) the suboccipital muscle group, 8) the superior trapezius muscle, and 9) the rhomboid muscle along the medial border of the scapula. At each palpation site a pain score (0-4) was obtained<sup>32</sup> with:~~

- ~~• 0 equaling neither pain nor reported tenderness,~~
- ~~• 1 equaling complaints of mild pain but no facial contortion (grimace), flinch or withdrawal,~~
- ~~• 2 equaling a moderate pain and degree of facial contortion (grimace) or flinch,~~
- ~~• 3 equaling a severe pain and marked flinch or withdrawal, and~~
- ~~• 4 equaling unbearable pain and withdrawal without palpation.~~

Formatted: Normal, No bullets or numbering

Stratification method for whiplash injuries

**The primary outcome measure**

The primary outcome variable selected a priori was handicap, which was defined as: a) sick leave > 3 months during the last 6 months; b) work inability during the entire last month; or c) not working anymore because of the accident.<sup>19</sup> The number of days on sick leave was computed by means of a completed diary (a patient log) and questionnaire data after 3, 6, and 12 months post injury. Days with sick leave counted as full days and days with reduced working hours counted as half days of sick leave. If the patient could manage a full-time job but had changed functions after injury, it counted as full-working hours. Patients who did not work prior to the injury (on leave, unemployed, disability pension, retired) were not considered in the calculated risk of handicap but were included in computation of the secondary outcome measures.

**The secondary outcome measures**

After 12 months neck pain and headache were rated on an 11-point NRS scale (0 = no pain, 10 = the worst imaginable pain). Pain scores from 0-4 were considered as "minimal pain" 5-10 "considerable pain".<sup>33</sup>

*Stratification method for whiplash injuries*

~~The neck condition after twelve months was assessed by means of the Copenhagen Neck Disability Scale<sup>34</sup>, where scores from 0-6 were defined as “minimal neck disability” and from 7-30 “considerable neck disability”.~~

**Study population**

~~The cohort has been described previously {Kongsted, 2007 #786;Kasch, 2008 #783;Kasch, 2008 #2177;Kongsted, 2008 #2238}. In short, persons with complaints from the neck and/or shoulder girdle (WAD grade I-III) seeking care at an emergency unit or a general practitioner within 72 hours after a motor vehicle collision were potential participants. Other inclusion criteria were: Age 18-70 years, exposure to a rear- or frontal-end car accident, and that an examination could be performed within 10 days after the injury.~~

~~Exclusion criteria were inability to read and speak Danish, injuries with fractures or dislocations (WAD grade IV), additional trauma other than the whiplash injury, pre-existing significant somatic or psychiatric disease, known active alcohol or drug abuse, and significant headache or neck pain (self-reported average pain during the preceding six months exceeding 2 on a 0-10 box scale, 0=no pain; 10=worst possible pain).~~



Stratification method for whiplash injuries

**Baseline registrations**

**Patient reported**

Pain: Neck pain and headache since the collision were scored on an eleven-point Numeric Rating Scale (0= no pain; 10=worst imaginable pain) {Collins, 1997 #81;Dworkin, 2008 #1464}.

Non-painful complaints: Participants were asked whether any of eleven non-painful complaints (paresthesia, dizziness, vision disturbances, tinnitus, hyperacusis, dysphagia, fatigue, irritation, concentration disturbances, memory difficulties, and sleep disturbances) had started or been markedly worse since the accident.

Post Traumatic Stress Response: Was measured by means of the Impact of Event Scale (IES) {Horowitz M, 1979 #206}. A total sum-score was calculated from all 15 items of the scale. In addition, an intrusion score (sum of 7 items) and an avoidance score (sum of 8 items) were calculated.

Work related factors: Expected difficulties with work were measured by asking "How big a problem do you expect it to be to take care of your job/study six weeks from now?" (0=no problem at all; 10=A very big problem, cannot work), and "How likely do you consider it that you will be

*Stratification method for whiplash injuries*

working/studying 6 weeks from now?" (0=very likely; 10=very unlikely). Self rated physical work demands were registered asking: "How physical demanding do you consider your present/most recent job" (0=not physical demanding at all; 10=very physical demanding).

*Clinical assessment*

Active neck mobility: Total CROM (CROM=cervical range of motion) including flexion, extension, right and left lateral-flexion, and right and left rotation was assessed with a CROM device as formerly described {Kasch, 2001 #793;Kasch, 2008 #2177}. Is used as part of the risk assessment score. High scores with reduced mobility and low scores with better performance.

Pressure algometry: The handheld Algometer (Somedic Algometer type 2™) was applied with a slope of 30kpa/sec and a probe area of 1.0 sq.cm. pressure pain detection thresholds (PPDT) were measured in triplets, whereas pressure pain tolerance thresholds (PPT) were measured by one application of pressure only {Kasch, 2008 #783}.

Methodical muscle palpation was performed bilaterally at nine sites: 1) the anterior part of the temporal muscle, 2) the posterior part of the temporal muscle, 3) the masseter muscle, 4) the lateral pterygoid muscle, 5) the

*Stratification method for whiplash injuries*

sternocleid at the mastoid insertion point, 6) the sternocleid at its middle belly, 7) the suboccipital muscle group, 8) the superior trapezius muscle, and 9) the rhomboid muscle along the medial border of the scapula. At each palpation site a pain score (0-4) was obtained {Wolfe, 1990 #527}<sup>32</sup>{Kasch, 2008 #783}

with:

- 0 equaling neither pain nor reported tenderness.
- 1 equaling complaints of mild pain but no facial contortion (grimace), flinch or withdrawal.
- 2 equaling a moderate pain and degree of facial contortion (grimace) or flinch.
- 3 equaling a severe pain and marked flinch or withdrawal, and
- 4 equaling unbearable pain and withdrawal without palpation.

**Risk stratification**

The risk stratification was performed as previously described by combining scores on pain intensity, CROM and number of non-painful complaints{Kasch, 2011 #2230}. Each factor was categorised and scored as

follows:

The highest score of neck pain and headache was categorised into: 0-2=0 points; 3-4=1 point; 5-8=4 points, 9-10=6 points.

*Stratification method for whiplash injuries*

Total active CROM was divided into: Below 200 degrees=10 points; 200-220=8 points; 221-240=6 points; 241-260=4 points; 261-280=2 points; above 280=0 points.

Number-of non-painful complaints: 0-2=0 points; 3-5=1 point; 6-11=3 points.

Following stratification was made: Stratum 1=0 points; stratum 2=1-3 points; stratum 3=4-6 points; stratum 4=7-9 points; stratum 5=10-12 points; stratum 6=13-15 points, and stratum 7=16-19 points .

**Outcome measures**

Follow-up questionnaires were posted to participants after 3, 6 and 12 months. Only 12 months follow-up was used for the present study.

**The primary outcome measure**

The primary outcome variable selected a priori was handicap, which was defined as: a) sick leave > 3 months during the last 6 months; b) work inability during the entire last month; or c) not working anymore because of the accident. <sup>2</sup> The number of days on sick leave was computed by means of a completed diary (a patient log) and questionnaire data after 3, 6, and 12 months post-injury. Days with sick leave counted as full days and days with reduced working hours counted as half days of sick leave. If the patient could manage a full-time job but had changed functions after injury, it counted as full working hours. Patients who did not work prior to the injury (on leave, unemployed, disability pension, retired) were not considered in the calculated

Formatted: Not Highlight

*Stratification method for whiplash injuries*

risk of 1-year work disability but were included in computation of the secondary outcome measures., Secondary outcome measures have been described elsewhere {Kongsted, 2007 #786;Kongsted, 2008 #2238}.

**Statistical analysis**

Data Analyses were made with Stata 12.0™ (StataCorp, Texas US) and Microsoft Excel 2010 for Windows™. Non-parametric statistics were applied for evaluating risk strata. Parametric data with normal distribution or log normal distribution was presented within each risk stratum graphs as mean ± sem values. Likelihood ratios were computed for each stratum for primary endpoints (refer to supplementary table 1).

**Comment [ak1]:** jeg tror det skal præciseres hvordan association mellem strata og outcome measures er undersøgt. Jeg synes likelihood ratios skal tilføjes

**Formatted:** English (U.S.)

**Statistical analysis**

Data Analysis was made with Stata 12.0™ (StataCorp, Texas US) and Microsoft Excel 2010 for Windows™. Investigators remained blind folded, until the analysis of the treatment effect had been done. Non-parametric statistics were applied for evaluating risk strata. Parametric data with normal distribution or log normal distribution was presented within each risk stratum graphs as mean ± sem values.

*Stratification method for whiplash injuries***Results**

Details of the study population has been described previously, a flow chart is presented in figure 1.<sup>30</sup> Briefly, a total of 1495 [F/M: 898/597] acute whiplash patients were contacted after being examined at the emergency units or by their general practitioners. Six hundred and eighty-eight eligible acute whiplash patients [F/M: 443/252] gave informed written and verbal consent to participate.

Two-hundred [F/M: 102/98] patients refused to participate. Five hundred and forty patients were ineligible, fifteen were excluded due to protocol violation.

Fifty-two patients with low-risk scores with a former moderate neck pain (VAS < 4) were excluded from the main study (fig. 1), but these patients were followed according to principles in the low risk group. (Results from these patients will be reported elsewhere).

~~Two-hundred [F/M: 102/98] patients refused to participate. Five hundred and forty patients were ineligible, fifteen were excluded due to protocol violation.~~

~~Fifty-two patients otherwise fulfilling inclusion/exclusion criteria but with a former moderate neck pain (VAS < 4) were also excluded. (Results from these patients will be reported elsewhere). Whiplash injuries were used to divide patients into high-risk groups and low-risk groups and recruitment for~~

**Comment [ak2]:** Skal eksclusionskriteriet så ikke rettes til ? Ikke klart hvorfor de er ekskluderet

### *Stratification method for whiplash injuries*

~~an intervention study. The patients were not informed about the risk group assignment. A detailed account of this classification system and the result of the intervention was made elsewhere.<sup>25-26</sup> Briefly, neither 1) mobilization nor 2) immobilization treatment was superior to a 3) stay active message given by the study nurse in the case of high-risk patients. A stay active message was equally effective if given verbally by the study nurse or by a booklet in the low-risk patients.<sup>27</sup>~~

#### Risk strata:

Fig. 2a shows a log-linear relationship between the risk assessment \_score and the number of days being sick for acute whiplash patients.

Fig. 2b shows distribution in the risk strata after one year of patients a) returning to work or b) have reduced functional capacity in full-time jobs or c) being work disabled. Whereas 96% had returned to work in stratum 1, only 32% of previous healthy whiplash-exposed in stratum 7 were back to work after 1 year (Kruskal-Wallis,  $p < 0.0001$ ).

In figures 3a-c the ability to perform work within 6 weeks and the ability to return to work within 6 weeks and the assessment of the physical job demands of their present/recent were rated after 5 median days on an NRS-

1  
2  
3  
4  
5 *Stratification method for whiplash injuries*  
6

7 11-point box scale. Job-related issues were increasingly severe the higher  
8 risk stratum of the patient (Kruskal-Wallis,  $p < 0.0001$ ).  
9

10  
11  
12  
13 The components of the impact of event scale in fig. 4 intrusion and avoidance  
14 and the total IES score were bar-graphed for each stratum. There was an  
15 increase in reported injury-related emotional distress in the risk strata  
16 (Kruskall Wallis,  $p < 0.0001$ ).  
17  
18  
19  
20  
21

22  
23  
24 Figures 5 a-e display the bar graphs of strata representing pressure  
25 algometry for both pain detection and pain tolerance thresholds for the  
26 muscles in the neck region: the masseter and the infraspinatus muscles and  
27 at a remote control site at the left 3rd finger joint. All these psycho-physical  
28 measures are differently distributed in the risk strata (~~Kruskal Wallis~~K-W,  $p <$   
29 0.0001). The total palpation score was similarly distributed significantly  
30 different in risk strata (K-W  $p < 0.0001$ ) with a score of 6 in stratum 1 and of 24  
31 in stratum 7 (refer to Supplementary figure 2).  
32  
33  
34  
35  
36  
37  
38  
39  
40  
41  
42  
43  
44

45 The Copenhagen Neck Disability Index score after 1 year was significantly  
46 related to risk strata (K-W,  $p < 0.0001$ ) and also 1-year 11-point box score of  
47 shoulder-arm pain, and neck pain, headache and global pain were  
48 significantly related to risk strata ( $p < 0.0001$ ).  
49  
50  
51  
52  
53  
54



1  
2  
3  
4  
5  
6  
7  
8  
9  
10  
11  
12  
13  
14  
15  
16  
17  
18  
19  
20  
21  
22  
23  
24  
25  
26  
27  
28  
29  
30  
31  
32  
33  
34  
35  
36  
37  
38  
39  
40  
41  
42  
43  
44  
45  
46  
47  
48  
49  
50  
51  
52  
53  
54  
55  
56  
57  
58  
59  
60

*Stratification method for whiplash injuries*

For peer review only

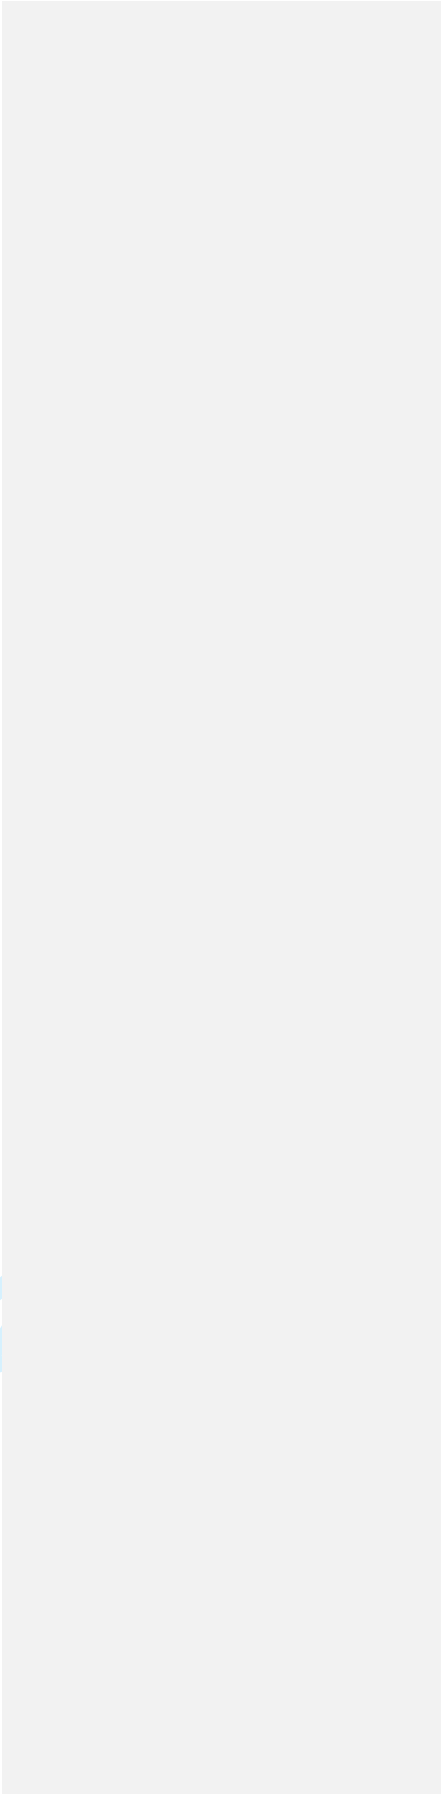

*Stratification method for whiplash injuries***Discussion**

This study shows that an early classification of patients into risk strata based on biological and certain psycho-social functions predicts non-recovery. In order to group patients into 7 different strata we used a scaling system resulting from observational findings from a former study. This system included four predefined categories: neck pain intensity, headache intensity, the number of non-painful symptoms and reduced neck mobility. The strata set in the present study was applied in clinical procedures undertaken at a time point where chronic symptoms could not have developed i.e. < median 5 days after injury. The scoring on neck mobility and non-painful symptoms was based on previous observations where a control group was included.<sup>19</sup> The summation score was arbitrarily determined, and it may be argued that if another scoring had been used, other findings might have been ascertained. Nevertheless, the scoring derived from the findings from a prospective observational study of acute whiplash patients (WAD I-III) with an ankle-injured control group in which active neck mobility was the most significant predictor for work disability. Neck pain / headache intensity as well as a high number of non-painful complaints were also predictive, however, to a lesser extent<sup>19</sup> as reflected in the supplemental ROC curves in fig S1. In the present work and in our previous studies<sup>19</sup> we used return-to-work and number-of-days parameters with sick leaves of 1 year as indicators of work disability.

*Stratification method for whiplash injuries*

The use of sick leave as a parameter of non-recovery has been discussed previously.<sup>19</sup> It may be argued that sick leaves are not a direct measure of non-recovery. But as for subjective symptoms such as pain, it is crucial to select robust and directly quantifiable factors in order to reduce the risk of investigator bias. Moreover, the fact that all measures were completed shortly after injury means that patients were in all probability prevented from changing their habitual, pre-injury health belief, which could have been affected by various sources, like the mass media, healthcare persons, family, or friends.<sup>23 35</sup>

The present study was embedded in a treatment study in which patients were divided into a low risk and a high risk treatment group (see fig.,1). By stratifying into their respective risk strata and splitting the low and high risk groups there was no difference on 1 year work disability based on their given treatment (K-W  $p > 0.15$  for high risk patients;  $p > 0.91$  for low risk patients).

~~We cannot exclude that the division of patients into two risk groups, high and low-risk groups, may have had an impact on the outcome. However, we believe that this is less likely due to the fact that Ppatients were furthermore not informed or being aware of whether they belonged to a high-risk or a low-risk group. We have previously shown that a prior dichotomous division of the present study material into a high-risk and a low-risk group based on earlier observations<sup>19-30</sup> could predict non-recovery. We have now augmented this~~

*Stratification method for whiplash injuries*

~~observation by showing that an a-priori stratification into 7 strata provides a more detailed documentation for the risk of long term sequelae. The Risk Assessment Score is robust for predicting 1-year work disability (ROC curve area 0.87) and shows a log-linear relationship for number of reported sick-listed days during the first year after whiplash injury. This is not possible with the existing WAD grading system.<sup>48</sup> The bio-psycho-social factors, which reflect Biological responses like neck strength, duration of neck movement, and psychophysical like muscle tenderness by palpation and pressure algometry and the cold-pressor pain response<sup>28</sup> (and as shown here: pressure pain detection and tolerance threshold, as well as stressful parameters like fear-avoidance and intrusion parameters, as well as and work-related issues) are logically distributed in the risk strata. The present risk stratification scheme rests on a selected and limited number of symptoms and signs based on prior observed findings. Legislative and detailed psychosocial factors were not included in the stratification. Such factors might also have an impact although the chances are that legislative issues hardly affect recovery as early as 5 days after injury. There may be other possible factors that can affect recovery<sup>24</sup>. In the present paper we suggest a way of stratifying whiplash patients in the acute state in order to improve the predictive power of prognosis. While the risk strata presented here need to be tested as prognostic factors in other cohorts in order to validate our findings,~~

*Stratification method for whiplash injuries*

1  
2  
3  
4  
5  
6  
7 the present study is one of the largest materials in the literature. Moreover,  
8  
9 the system has not yet been tested in relation to its possible usefulness in  
10  
11 guiding clinical decisions about the choice of treatment. It is a possible  
12  
13 downside to risk assessment, that health-care professionals could make  
14  
15 premature or hasty decisions when faced with a certain patient who scores  
16  
17 high on a prognostic scale like ours. With such scorings health-care  
18  
19 professionals might unconsciously associate the patient's injury with a  
20  
21 prognosis of the chronicity type and act accordingly to some extent. The  
22  
23 Quebec Task Force's WAD grading represented a first attempt to better  
24  
25 characterize and identify patients at risk for long-term consequences after a  
26  
27 whiplash injury. However, subsequent studies demonstrated that the Quebec  
28  
29 WAD grading was of little value in predicting long-term sequelae.<sup>9 18</sup>  
30  
31 Emotional distress and social factors implicated a risk of reduced recovery<sup>20</sup>  
32  
33 PTSD (post-traumatic stress disorder),<sup>15 20</sup> catastrophizing,<sup>21</sup> kinesiophobia  
34  
35 stress-response<sup>25</sup> are factors associated with the risk of persistent  
36  
37 complaints. A trajectory system has been proposed by Sterling et al {Sterling,  
38  
39 2011 #978} including 4 groups from no pain/disability to severe pain/disability,  
40  
41 which needs further validation. New subgroups in the WAD. It is generally  
42  
43 agreed upon, that there is a need for studies confirming and validating  
44  
45 prognostic models and a need for improved models after acute WAD  
46  
47 {Sterling, 2011 #2231}.  
48  
49  
50  
51  
52  
53  
54

*Stratification method for whiplash injuries*

Other studies have found post-traumatic stress,<sup>15</sup> the presence of sensitization<sup>36</sup> and neck pain and headache intensities to be predictive of chronic neck disability 1 year after injury.<sup>10 37</sup> These findings are consistent with the present results. Expectations for recovery{Holm, 2008 #804}. perceived injustice after the accident{Sullivan, 2012 #2680}. Reduced Active neck mobility has been of importance in some, but not a majority of prospective studies.{Hendriks, 2005 #193}. We are rather convinced of its prognostic value, reaching as stand-alone test an area under the ROC curve of impressive 0.79 (CI95 0.75:0.85) in this multicenter study predicting 1-year work disability.

**Conclusion**

The risk assessment score is applicable and inexpensive. Early identification of whiplash-exposed persons at risk is important for planning future treatment in scientific studies. Further studies are needed, however the risk assessment score might in the future -as well be introduced as a tool for the individual guidance and management of the patient.

1  
2  
3  
4  
5  
6  
7  
8  
9  
10  
11  
12  
13  
14  
15  
16  
17  
18  
19  
20  
21  
22  
23  
24  
25  
26  
27  
28  
29  
30  
31  
32  
33  
34  
35  
36  
37  
38  
39  
40  
41  
42  
43  
44  
45  
46  
47  
48  
49  
50  
51  
52  
53  
54  
55  
56  
57  
58  
59  
60

*Stratification method for whiplash injuries*

Application of the risk assessment score may be a valuable alternative to the present WAD grading system in predicting work disability and pain and certain psychosocial parameters after neck injury. Furthermore, a bio-psychosocial risk assessment could be applied in other acute conditions bearing a risk of long-term development of other chronic dysfunctional pain conditions.

**Acknowledgements**

Participants were recruited with the help of the staff at the emergency units at hospitals in the 4 former counties of Viborg, Aarhus, Vejle and Funen during the enrolment period. Statistical consulting was provided from Dept. of Statistics, University of Southern Denmark on designing the study. Financial support was provided by an unrestricted grant from The Danish Insurance Association.

*Stratification method for whiplash injuries*

Appendix

Legends

Figure 1. Flowchart for the Whiplash study.

Figure 2a. Risk Strata and Number of Sick-listed Days during First Year after Whiplash Injury

Figure 2b. One Year Recovery from Whiplash Injury in Risk Strata

Figure 3a-c. Initial Numeric Rating of Work Related Issues in Risk Strata.

Figure 3 a. Expecting problems managing ones job/education in 6 weeks.

Figure 3b. Likelihood of being back to work/education in 6 weeks

Figure 3c. Evaluation of the physical job requirement of current or most recent job/education

Figure 4. The Impact of Event Scale with subscales of Intrusion and Avoidance shown in risk strata.

Figure 5 a-e. Pressure algometry in the neck and head and remote from injury in risk strata. PPT pressure pain tolerance threshold and PPDT pressure pain detection threshold (kilo Pascal, Mean  $\pm$  SEM).

Figure S1 (supplementary) ROC curve of individual risk factors and the Whiplash Risk Assessment Score.

[Figure S2 \(supplementary\) Total Palpation Score in Risk strata in acute whiplash patients](#)



Stratification method for whiplash injuries

For peer review only

1  
2  
3  
4  
5  
6  
7  
8  
9  
10  
11  
12  
13  
14  
15  
16  
17  
18  
19  
20  
21  
22  
23  
24  
25  
26  
27  
28  
29  
30  
31  
32  
33  
34  
35  
36  
37  
38  
39  
40  
41  
42  
43  
44  
45  
46  
47  
48  
49  
50  
51  
52  
53  
54  
55  
56  
57  
58  
59  
60

---

## Contributorship Statement

---

|                 | Conception | Design | Analysis | Interpretation of data | Drafting article | Critical revision | Final approval of version to be published |
|-----------------|------------|--------|----------|------------------------|------------------|-------------------|-------------------------------------------|
| Helge Kasch     | X          | X      | X        | X                      | X                | X                 | X                                         |
| Alice Kongsted  | X          | X      | X        | X                      |                  | X                 | X                                         |
| Erisela Qerama  | X          | X      |          |                        |                  | X                 | X                                         |
| Flemming W Bach | X          | X      |          |                        |                  | X                 | X                                         |
| Tom Bendix      | X          | X      |          |                        |                  | X                 | X                                         |
| Troels S Jensen | X          | X      | X        | X                      | X                | X                 | X                                         |

## Revision Manuscript BMJ OPEN

Manuscript ID bmjopen-2012-002050 entitled "A new stratified risk assessment tool for whiplash injuries predicts recovery"

25-Oct-2012 (Deadline + 28 days = 22-Nov-2012)

[http://mc.manuscriptcentral.com/bmjopen?URL\\_MASK=bGwG4MnGtBFnkC4jRNSS](http://mc.manuscriptcentral.com/bmjopen?URL_MASK=bGwG4MnGtBFnkC4jRNSS)

Reviewer: Prof. Dr. Michele Curatolo  
Head, Division of Pain Therapy  
University Department of Anaesthesiology and Pain Therapy University of Bern, Inselspital  
3010 Bern, Switzerland

I have no competing interests.

Kasch et al performed a prospective prognostic study in whiplash. They used criteria from an early study in a subsequent large cohort of patients. Such studies are very difficult to perform and there is definitely a need for them. The results seem to identify criteria that can help detecting patients in the acute phase of a whiplash injury who are likely to develop chronic pain. In my opinion, the main relevance of the findings consists in the possibility to better select patients in the acute phase who would qualify for studies on preventive and treatment strategies. In my opinion, at this stage the data cannot be used for clinical decision making.

Together with positive aspects, the study has some limitations that I list below.

- a. The paper is hard to read, as the presentation is unclear and incomplete at different places of the manuscript.
  - i. The introduction, and especially the methods and result section have undergone revision.
- 2) The therapeutic interventions are mentioned pretty briefly under study population. This issue should be presented separately and expanded.
  - i. This has been published in detail in previous papers by Kongsted et al, however is now more clearly described in methods and now is shown in flowchart as well (fig 1)
- 3) The description of the treatments is confusing. Initially, three parallel treatment groups are mentioned; then, it seems that two treatments have been applied to the low risk group.
  - a. Please re-write and clarify. Has been done, see the above comments
    - i. Has been rewritten as above
  - b. I suggest that the treatments be introduced in the flowchart.
    - i. Has been done

1  
2  
3  
4  
5  
6  
7  
8  
9  
10  
11  
12  
13  
14  
15  
16  
17  
18  
19  
20  
21  
22  
23  
24  
25  
26  
27  
28  
29  
30  
31  
32  
33  
34  
35  
36  
37  
38  
39  
40  
41  
42  
43  
44  
45  
46  
47  
48  
49  
50  
51  
52  
53  
54  
55  
56  
57  
58  
59  
60

c. The flowchart divides patients into two groups (low and high risk), but it is not clear what actually differentiates these two groups, since the right and left arm look almost identical. Please clarify.

i. Based on the risk criteria, the patients were divided into a high and low risk group. Being female however was decided to give 1 risk point based on other studies, therefore more women are in the high risk group (although being female was not a significant risk factor for 1 year work disability in neither the previous prospective study (Neurology 2001, Kasch et al) or this material (Eur J Neurology 2008, Kasch et al)

4) The palpation test that you used for the clinical assessment is of unclear origin.

i. ACR criteria by Wolfe et al, Arthritis Rheum, vol 33 160-172) has been applied as well as previous publication reference by HK added in the text

1. The results of this examination may be very examiner-dependent. We agree upon that.

Are there any data on its inter-rater reliability? We did training courses, in which all project/research nurses, physiotherapists, and doctors trained standardized palpation technique, pressure algometry and CROM measurement before the commencement of the study. Measurements (approx. 5 persons/examiner) were performed on thirty healthy subjects and with a short time-delay 1.5hrs -2 hours) reexamination was performed. During the time-course of the project, the physiotherapists and project nurses met several times to calibrate the examination technique and discuss eventual problems. However, there were significant difference in variability in scoring patients regarding palpation in the centers but also pressure algometry/PDDT and PTT by means of 2 way Anova ( Stata: *anova "palpation\_sumscore" center (A orB) Stratum(1-7) center#stratum.*

For the main clinical measures: no significant differences for VAS score of max headache/neckpain ( $p > 0.20$ ) or number of non painful symptoms ( $p > 0.58$ ) and neither for cervical range of motion ( $P > 0.19$ ), and stratum (1-7) did not turn out as a significant factor together with center in any of the analyzes (e.g. center#stratum).

We have given some figures and made a short comment on the above in methods/statistics and results and discussion as well.

5) Primary outcome: please specify whether all the three criteria or only one have to be fulfilled in order to categorize the outcome as handicap.

a. Only one of three is necessary, the text is clearer now in "Outcome measures".

6) The statistical analysis is not explained, which is unusual for such a complex study.

Statistics have been enhanced. We only apply initial measures and 1 outcome for 7 strata, therefore no longitudinal examination is needed

a. What kind of non-parametric statistics has been performed?

i. The risk factors were found in a previous study in which we examined by Kaplan Meier and Cox regression analysis and time dependency was also evaluated for the studied factors (Kasch et al Neurology 2001) similarly in 2008 Eur J Neurology this method was applied

ii. The statistical task is therefore more simplistic here, where we have an initial value for the measured parameters (pressure algometry, palpation, work related VAS scores and so forth and use a robust non-parametric Kruskal Wallis test grouping with use of the 7 risk strata.

iii. Data are (may be a little confusing, but has been explained in more detail) as well presented in graphs if normal - or log normal distributed as mean +/- sem, but for the statistics the K-W test was applied. K-W test also applied for the other

analyses in which risk strata were analyzed. We only present data from 1 time point either the start or the ending (recovery +/-; number of days on sick leave).  
 iv. There is an inborn design weakness of the study, because we divided patients into different treatment groups. However there was no substantial effect on outcome in neither low risk patients (verbal or booklet) nor high risk patients (verbal info; McKenzie phys, Semirigid neck collar), furthermore we did a subanalysis on the treatment groups in the high and low risk (original division in the project). And by means of stratification into their respective risk strata and splitting into low/high there was no difference in the treatment groups either (K-W  $p > 0.15$  (the high risk patients) and  $p > 0.91$  (the low risk patients), this has been added in results.

- b. What methods have been used to analyze the influence of the different predictors on the outcome? ROC curves are now provided for each risk factor in suppl fig. 1
- c. How did you analyze the effect of the three treatments and their potential confounding influence?
- i. See above answer (7.0)
- d. After I have read the results, it seems that you compared the different strata for the different parameters. This can certainly be done, but prognostic studies are typically analyzed by more complex procedures, e.g. multivariate analyses. Please comment.
- i. The risk factors we have chosen were shown in previous studies (Kasch et al Neurology 2001 and Eur J Neurology 2008). Co-variance between non painful symptoms and painful symptoms are present and GLM analyses showing these calculations have previously been provided and we have previously shown an age, but not a gender effect on neck mobility. We therefore consider the situation different in this study applying this rather simplistic approach, but with a robust K-W analysis.
- 7) At the end of the results, pressure algometry is reported, but this procedure is not presented in the study aims and is not described in the methods section.
- a. Has been specified in methods
- 8) It would be relevant to know more on the clinical performance of the stratification that you used. This is typically done by computing
- a. sensitivity
- b. specificity
- c. and likelihood ratios of the tests.
- i. Supplementary table 1 gives these data, as well as supplementary ROC curves for each parameter (CROM\_negativized, Number of non-painful symptoms; VAS max-Headache/Neckpain and total Risk score)
- 9) At the end of the discussion you mention problems related to categorizing patients as being at high risk. The message is obscure to me, please clarify. In this respect, see my comment above: as long as the predictive value is not quantified, see suppl table 1 and ROC curves.
- 10) , it is hard to define the role of the stratification for clinical decision making. It can still be said that knowledge on the prognostic factors can help selecting patients for studies on preventive strategies, since it makes more sense to enroll patients who are more likely to develop chronic pain. I suggest that you stress this point.

#### MINOR ISSUES

I do not understand what segregated means, see e.g. the sentence in the abstract: Bio-psychosocial factors were significantly segregated from the first assessment by risk strata . Please check if this is a correct english term.

This term has been removed in the abstract and text as well

1  
2  
3  
4  
5  
6  
7  
8  
9  
10  
11  
12  
13  
14  
15  
16  
17  
18  
19  
20  
21  
22  
23  
24  
25  
26  
27  
28  
29  
30  
31  
32  
33  
34  
35  
36  
37  
38  
39  
40  
41  
42  
43  
44  
45  
46  
47  
48  
49  
50  
51  
52  
53  
54  
55  
56  
57  
58  
59  
60

Under key messages, please delete the term more or less and specify what you mean by out of work .  
Has been deleted (more or less) and (out of work) has been rewritten.

Under strengths , the third item would actually fit under limitations , since the need for further validating the score is not a strength.  
We agree, this third item has been placed under limitations.

Please remove more or less from the 1st sentence of the introduction.  
Has been removed.

Exclusion criteria: I guess that the significant past pain conditions were exclusion criteria, which is not clearly specified.  
The section has been totally rewritten for clarity.

Also, neck pain and headache is mentioned under the bullet list and again few lines below, this time specifying the VAS. Please correct and delete the repetition.

Please explain the abbreviation  
CROM. Has been explained in Methods Clinical assessments.

The CROM scale indicates that the higher the score, the worse the points. Please explain the score for those who are unfamiliar with it.  
CROM details given in Methods Clinical assessments. And scoring system in detail under Risk Stratification in Methods.

1  
2  
3  
4  
5  
6  
7  
8  
9  
10  
11  
12  
13  
14  
15  
16  
17  
18  
19  
20  
21  
22  
23  
24  
25  
26  
27  
28  
29  
30  
31  
32  
33  
34  
35  
36  
37  
38  
39  
40  
41  
42  
43  
44  
45  
46  
47  
48  
49  
50  
51  
52  
53  
54  
55  
56  
57  
58  
59  
60

---

Reviewer: Samuel McLean, MD, MPH  
Vice Chair, Research, Department of Anesthesiology Attending Physician, Department of Emergency  
Medicine University of North Carolina, Medical School Wing C, Chapel Hill, NC, USA

This is an excellent and important study.

For peer review only

1  
2  
3  
4  
5  
6  
7  
8  
9  
10  
11  
12  
13  
14  
15  
16  
17  
18  
19  
20  
21  
22  
23  
24  
25  
26  
27  
28  
29  
30  
31  
32  
33  
34  
35  
36  
37  
38  
39  
40  
41  
42  
43  
44  
45  
46  
47  
48  
49  
50  
51  
52  
53  
54  
55  
56  
57  
58  
59  
60

---

Reviewer: Dr Alison Rushton

Senior Lecturer Physiotherapy / Physiotherapy Research Lead University of Birmingham United Kingdom

I have no competing interests with this study.

There is valuable data here to inform assessment and management of patients following whiplash injury that is important to publish. I would urge the authors to consider the feedback to improve clarity of the study and its clinical messages.

Thank you for the opportunity to review this interesting and large prospective study. There is valuable data here to inform assessment and management of patients following whiplash injury that is important to publish. However the article does require considerable attention before it is acceptable for publication, as clarity of methods and results are difficult for the reader to access in its present form. In particular, further discrimination of content will assist clarity of the results and key clinical messages.

Abstract

1. The abstract contains abbreviations that affect clarity. It would be best to use all words in full for the abstract.

Abbreviations have been removed

2. The results need to be more clearly reported in relation to the defined outcomes of interest. The results need to accurately reflect the main text.

The result section of the abstract has been changed to reflect the main text

3. There is no analysis / discussion of findings within the abstract.

Has been added

4. The conclusion needs to relate specifically to the defined outcomes of interest.

Has been rewritten and shortened

The point re bio-psychosocial issues is unclear.

Has been changed in results of the abstract section

Article summary

5. This summary needs to reflect accurately the content and terminology of the finalised article.

The summary has been shortened and revised.

6. The detail of the RCT interventions in the limitations section is not relevant. It would be clearer to keep the focus to this study.

We have rewritten, and more clearly made reference to previous papers covering the treatments

Introduction

7. Is the premise that the Spitzer WAD classification was designed to predict outcome accurate? This is also mentioned in the conclusion

The attempt from the original spine paper (The Quebec Task Force) was to extract best evidence what was known about relevant factors to describe whiplash patients from early after injury. The time-scale from the taskforce group was not generally accepted/applied, however the WAD grading system is applied in several prospective studies and also used in units in various countries to our knowledge, being a gold standard.

8. What is the quality of the existing literature in this area? In 1995 when the Quebec task force did its search on literature only few quality studies had been performed. In a round table discussion 2011 (Sterling,



1  
2  
3  
4  
5 Carroll, Kasch, Kamper and Stemper, Spine vol 36, 25S, dec 2011, S330-S334) the prognostic factors of  
6  
7  
8  
9  
10  
11  
12  
13  
14  
15  
16  
17  
18  
19  
20  
21  
22  
23  
24  
25  
26  
27  
28  
29  
30  
31  
32  
33  
34  
35  
36  
37  
38  
39  
40  
41  
42  
43  
44  
45  
46  
47  
48  
49  
50  
51  
52  
53  
54  
55  
56  
57  
58  
59  
60

Carroll, Kasch, Kamper and Stemper, Spine vol 36, 25S, dec 2011, S330-S334) the prognostic factors of  
whiplash injury are discussed, concluding “ the current evidence is not sufficiently robust to be able to  
confidently predict outcome after whiplash injury” however a set of consistent risk factors are proposed  
being priority measures for inclusion in future prognostic studies (Table 1). This reference and its message  
has been mentioned in the Introduction

9. The previous study (Kasch et al, 2001) and the development of the tool to assess risk merits further  
consideration in this section to inform the reader.

References have been made to help the reader. Further elaboration on the subject added.

10. It is unclear why the other factors identified in the literature were not included in this study (first  
paragraph P11). This appears to be due to the timing of this study with data collection preceding this later  
work.

This is a correct observation Impact of event was not studied in the previous study,  
perceived injustice is a relatively new concept introduced by M Sullivan. We have from this study reported  
on IES and emotional distress (Kongsted et al) from Symptom check list, SF-36 subscales and so forth (Tina  
Carstensen et al, and other relatively new studies by Buitenhuis et al, McClean, Sterling et al have looked at  
stress/distress, impact of event.

The more recent literature is therefore best included in the discussion for evaluating this study s findings.

We have according to above comments moved some of the introduction to  
the discussion area.

#### Materials and methods

11. The design of this study within the RCT merits further consideration. Are there any implications of  
this design (multiple interventions across two trials) e.g. any potential treatment effects for your  
conclusions? Beyond a couple of brief mentions this point is not addressed.

In statistics and results this has now been considered, and statistics on this are provided.

12. This is not reporting a trial and therefore the Consort checklist is not appropriate.

We agree, the consort checklist has been removed

13. The clarity of this study as distinct to the trials needs to be clearer throughout. Much of the content  
re the trials can be removed as it is not relevant to this study. At present the inclusion of trial information is  
confusing for the reader.

The section has been rewritten, shortened and hopefully more clearly described.

14. P12 refers to a group of low risk patients (line 31) and this is unclear. In looking back at the previous  
trial it refers to allocation of low risk patients to this trial (Kongsted et al, 2008) following an allocation  
scoring system. The high risk patients were allocated to a different trial (Kongsted et al, 2007). Please clarify  
and discriminate this content so that the reader is clear.

Has been rewritten.

For example can this be clarified within the inclusion criteria? Are you referring to participants of both  
previous trials being included in this study?

Yes, see changed flowchart for clarification and methods

If referring to participants from both trials is this risk categorisation relevant to the current  
study? Has been clarified.

15. It is unclear why such a broad range of WAD grades were included (I-III) (P13). This requires  
justification. Were WAD classification 0 patients excluded?

Yes. They should present with relevant symptoms developed within 72 hrs after injury

16. The exclusion of significant headache or neck pain is unclear (P13). The rationale and detail of this  
requires explanation. Does the later point (P14, line 22) link to this criterion? If so why were these patients  
excluded? Has been explained in text in methods in new section “study population”

17. What is meant by “significant past pain conditions were in detail”: and the list afterwards? If  
(P13/14). If having a significant past pain condition patients were excluded.

1  
2  
3  
4  
5 18. The validity of the total risk assessment score merits mention and weighting of individual  
6 components is not mentioned (P15).

7 Are the included ROC curves from the previous study or current data? This requires explanation and if from  
8 the previous study a reference rather than reproduction of the curves would suffice.

9 ROC curves have been provided from the present study as supplementary material Fig S1A-  
10 D, as well as a supplementary table with likelihood ratios for each stratum. (suppl table 1)

11 19. There are differences in the description of outcome measures used throughout the paper which is  
12 confusing for the reader. The terminology and clarity of outcome measures needs to be clear throughout.  
13  
14

15 The outcomes of interest at 1 year set a priori are detailed as: handicap, NRS neck pain, NRS headache, and  
16 Copenhagen disability (pages 18/19) but this is different to the abstract and is confused by the clinical  
17 assessment content and results sections where other outcomes are reported.  
18

19 The term handicap has been removed as endpoint in the text. Abstract has been changed, Outcome  
20 measures have been rewritten.  
21  
22

23 Can the clinical assessment section be deleted (does not appear relevant to this study?)

24 We have made changes, but the assessment of CROM, palpation and pressure algometri eventually needs a  
25 brief introduction for the general reader.

26 and the results section focused to the outcome measures of interest?

27 This has been rewritten.

28 The section has been rewritten according to these suggestions with reduction of "clinical assessment" and  
29 introduction of "Baseline registrations, however for the graphs presented we consider the presentation of  
30 palpation score,algometry crom measurement important for the reader.  
31  
32

33 20. The distinction of primary and secondary outcomes is relevant to the trial but not this observational  
34 study of risk factors.

35 Secondary outcome measures are only briefly mentioned however the reader should know about the work  
36 disability used in outcome.

37 The follow up dates of 3 and 6 months from the trial are not relevant to this study as it focuses on 1 year  
38 follow up.  
39

40 data was used in assessment of sick leave and recovery (measuring primary outcome  
41 measures, this has been briefly mentioned in methods  
42

43 Results

44 21. The number of participants included needs to be clear on P21. We have removed information on the  
45 subgroup with previous neckpain that we followed, see flowchart changes and removal/change in start of  
46 result section.

47 22. The risk categorisation into low and high risk is again mentioned here (P21) and in the flow diagram  
48 and appears irrelevant in this study see point 15. The results of the previous trial are not relevant to the  
49 results of this study.  
50

51 According to comments by professor Curatolo we have however put all detail in the  
52 flowchart, but reduced and simplified the text in the methods/results.

53 However, we have to inform the reader that this study was embedded in a randomized trial  
54 splitting into low risk and high risk patients receiving different treatments.

55 23. No detail is provided of the risk stratification in this section and the numbers in the strata.

56 Details are now present both in supplementary table 1  
57

58 24. This section needs to relate specifically to the a priori defined outcomes e.g. why is handicap not  
59 reported as on P18? New outcomes are introduced in this section e.g. IES, assessment of physical job  
60 demands, pressure algometry etc. Some outcomes are not reported e.g. NRS neck pain and Copenhagen  
disability. This section needs to be considered further to avoid the potential of selective outcome reporting

1  
2  
3  
4 / data mining. In order not to give the impression of data mining also outcome for Copenhagen neck  
5 disability and neck/headache/shoulder and global pain, McGill pain data are reported in results.  
6  
7

8 Initially we hesitated about bringing pain data forwards being part of the initial scoring system with  
9 eventual redundancy, but we agree upon your arguments.

10 Discussion and conclusions

11 25. There is no discussion of the findings in the context of the existing literature? This has been applied in  
12 discussion where appropriate. The discussion on the risk factors and other potential risk factors has been  
13 broadened  
14

15  
16 26. The point on P24 lines 37-45 is unclear. A lot of time is spent discussing the previous study on the risk  
17 assessment score that would be best in the introduction.

18 The text has been edited in the discussion and some placed in introduction

19 27. The points re division of patients into two groups (P25) are unclear as the patients were not in two  
20 groups for the analysis and presentation of results. Is this point about potential treatment effects and best  
21 included under limitations? Eventual grouping/treatment effect is discussed and statistics/data provided  
22

23 28. Introduction of bio-psychosocial factors at this discussion stage is unclear as it is not mentioned  
24 earlier in the paper. The conclusion re bio-psychosocial is also unclear. This has been rewritten and  
25 psychosocial term has been removed.

26 29. Sample size for this study and number of participants in the strata are not mentioned. Added in  
27 supplementary table1  
28

29  
30 30. The exclusion of patients not working prior to the injury for the main outcome of interest needs to be  
31 acknowledged as a key limitation. How many participants were therefore excluded from the analysis? Data  
32 have been provided in EUR J Neurol 2008. H Kasch, they are relevant here as well, 30 were unemployed  
33 (but were accounted for as "job available", 10 with either disability pension or pension were excluded from  
34 analysis. Has been added in results.  
35

36  
37 31. How are findings from the literature consistent with this study's results? (P27 lines 27-34) Is now  
38 discussed.  
39

40 32. The clinical messages from the paper can be clearer to assist the reader.  
41 Issues of presentation  
42

43 33. The writing style, grammar and meaning are not always clear. E.g. suffering more or less (P9). More  
44 or less has been removed, much has been totally rewritten.  
45  
46

47 34. Investigators should be blinded rather than blind-folded (P19). This slip has been removed ;-)  
48  
49  
50  
51  
52  
53  
54  
55  
56  
57  
58  
59  
60



**A new stratified risk assessment tool for whiplash injuries predicts recovery**

|                                 |                                                                                                                                                                                                                                                                                                                                                                                                                                                          |
|---------------------------------|----------------------------------------------------------------------------------------------------------------------------------------------------------------------------------------------------------------------------------------------------------------------------------------------------------------------------------------------------------------------------------------------------------------------------------------------------------|
| Journal:                        | <i>BMJ Open</i>                                                                                                                                                                                                                                                                                                                                                                                                                                          |
| Manuscript ID:                  | bmjopen-2012-002050.R2                                                                                                                                                                                                                                                                                                                                                                                                                                   |
| Article Type:                   | Research                                                                                                                                                                                                                                                                                                                                                                                                                                                 |
| Date Submitted by the Author:   | 29-Dec-2012                                                                                                                                                                                                                                                                                                                                                                                                                                              |
| Complete List of Authors:       | Kasch, Helge; Danish Pain Research Centre, Dept of Neurology<br>Kongsted, Alice; Nordic Institute of Chiropractic and Clinical Biomechanics<br>Qerama, Erisela; Aarhus University Hospital, Dept of Neurophysiology<br>Bach, Flemming; Aarhus University Hospital, Aalborg Sygehus, Neurology<br>Bendix, Tom; Copenhagen Spine Center, Glostrup Hospital, Dept. of<br>Rheumatology<br>Jensen, Troels; The Danish Pain Research Center, Dept of Neurology |
| <b>Primary Subject Heading</b>: | Evidence based practice                                                                                                                                                                                                                                                                                                                                                                                                                                  |
| Secondary Subject Heading:      | Rehabilitation medicine, Diagnostics, Neurology, Legal and forensic medicine                                                                                                                                                                                                                                                                                                                                                                             |
| Keywords:                       | Neurological pain < NEUROLOGY, TRAUMA MANAGEMENT, Trauma management < ORTHOPAEDIC & TRAUMA SURGERY, ACCIDENT & EMERGENCY MEDICINE                                                                                                                                                                                                                                                                                                                        |
|                                 |                                                                                                                                                                                                                                                                                                                                                                                                                                                          |

SCHOLARONE™  
Manuscripts

only

**Heading at BMJ**

---

**A new stratified risk assessment tool for whiplash injuries predicts recovery**

---

Helge Kasch, MD, PhD Senior Consultant Neurologist<sup>1)</sup>; Alice Kongsted, DMSc (Clin Biomech), PhD Senior Research fellow<sup>2)</sup>; Erisela Qerama, MD PhD, Consultant Neurophysiologist<sup>3)</sup>; Flemming W. Bach, MD DMSc, Clinical Professor of Neurology<sup>4)</sup>; Tom Bendix, MD DMSc, Clinical Professor of Rheumatology<sup>5)</sup>; Troels Staehelin Jensen MD DMSc, Clinical Professor of Neurology<sup>1)</sup>

- 1) The Danish Pain Research Center, Dept. of Neurology, Aarhus University Hospital, Noerrebrogade 44; DK-8000 Aarhus, Denmark
- 2) Department of Research, Spine Center of Southern Denmark, Hospital Lillebaelt, Institute of Regional Health Research, University of Southern Denmark
- 3) Dept. of Neurophysiology, Aarhus University Hospital, Noerrebrogade 44; DK-8000 Aarhus, Denmark
- 4) Dept. of Neurology, Aarhus University Hospital, Aalborg Hospital, Ladegaardsgade 5 DK-9100 Aalborg, Denmark
- 5) Copenhagen Spine Center, Glostrup Hospital, Ndr. Ringvej 57, 2600-DK, Glostrup, Denmark

*Stratification method for whiplash injuries*

Contact: Helge Kasch, Senior Consultant Neurologist, PhD. The Headache  
Clinic and Danish Pain Research Center, Dept. of Neurology, Aarhus  
University Hospital, Noerrebrogade 44, DK-8000 Aarhus DENMARK.

Email: [helge.kasch@dadlnet.dk](mailto:helge.kasch@dadlnet.dk),

Tel.: + 45 7846 3333

Fax: +45 7846 3300

**Key Words**

Whiplash Injuries, Prognosis, Neck Pain, Headache, Range-of-Motion, Risk  
Factors

**Number of figures: 5 + 2 supplemental figures S1 S2**

**Number of tables: 1, supplemental table 2**

**Number of words count: 3345 (incl. acknowledgements)**

**Correspondence to**

Dr. Helge Kasch, Dept. of Neurology, Aarhus University Hospital,  
Noerrebrogade 44, DK-8000 Aarhus, Denmark. Email

[helge.kasch@dadlnet.dk](mailto:helge.kasch@dadlnet.dk)

Fax: 0045 78463300

*Stratification method for whiplash injuries***Introduction**

Chronic pain represents a major problem in the Western World with approximately 20% of the adult population suffering from chronic pain. Our ability to deal with these chronic pain conditions is insufficient as it is in various other areas, such as traumatic injuries and pain following surgery or other medical procedures. Identifying patients at risk of developing chronic pain is a prerequisite for establishment of prophylactic initiatives.

When discussing pain following surgery, it has been demonstrated that prior pain intensity, the duration of pain, the type of surgery, the nerve damage during surgery as well as psychological factors, information and the setting and the genetic endowment are of significant importance with respect to the future development and persistence of chronic pain.<sup>1-5</sup> Also regarding musculoskeletal pain conditions, such as headache<sup>6</sup>, cervical sprains<sup>7</sup>, and low back pain conditions,<sup>8</sup> there is an interest in exploring the potential risk factors aligned with persistent pain. The specific type of distortion of the cervical spine, stemming from a so-called *whiplash injury*, in which the neck spine is exposed to a forced extension-flexion trauma, is often followed by a late pain state known as whiplash-associated disorders (WAD).<sup>9 10</sup>

These injuries may be associated with a reduction of the pain threshold to mechanical pressure in the neck muscles<sup>11 12</sup>, a reduction of nociceptive

*Stratification method for whiplash injuries*

1  
2  
3 flexion reflexes,<sup>13</sup> and an expansion of cutaneously referred pain symptoms  
4  
5 following infusion of hypertonic saline into muscles both at the injury site and  
6  
7 in areas remote from the injury site.<sup>14</sup> These findings suggest generalized  
8  
9 hyper- excitability following a whiplash injury which resolves in patients  
10  
11 recovering after injury but persists in patients with on-going symptoms<sup>2 11 15-17</sup>  
12  
13  
14  
15  
16  
17

18 Whiplash-associated disorders fall into the categories O-IV according to the  
19  
20 Quebec WAD grading.<sup>9</sup> In a previous observation study we found that a risk  
21  
22 score based on neck pain, headache, the number of non-painful symptoms,  
23  
24 and reduced neck mobility to be associated with a marked risk of reduced  
25  
26 recovery.<sup>18</sup> Based on these observations the objective of this study was to  
27  
28 test a stratified risk assessment scoring system for predicting long-term  
29  
30 sequelae after a whiplash injury. A risk index was developed in a previous  
31  
32 cohort and the predictive capability of seven risk strata tested.<sup>18 19</sup> In the  
33  
34 present study we test if the seven risk strata are useful for prediction of  
35  
36 outcome in that second sample. In addition, differences in psychological and  
37  
38 social factors across the strata are described.  
39  
40  
41  
42  
43  
44  
45  
46  
47  
48  
49  
50  
51  
52  
53  
54  
55  
56  
57  
58  
59  
60



## **Materials and methods**

### **Study overview**

A risk stratification index based on measures of intensity of neck pain and headache, cervical range of motion (CROM), and number of non-painful complaints was developed in a previous sample of whiplash injured seen in an emergency care unit.<sup>18</sup> Using a pragmatic approach, seven risk strata were formed and this stratification was strongly associated with outcome.<sup>19</sup> In the present study these risk strata are tested in another sample enrolled between May 2001 and June 2003. The study concludes secondary analysis of two parallel RCT's.<sup>20 21</sup> Patients were enrolled within 10 days of a whiplash injury. Those with a low risk stratification index score were randomised to either oral or written advice to act as usual,<sup>20</sup> whereas patients with high risk scores were randomised to immobilisation (semi-rigid neck collar), active mobilisation (McKenzie technique) or the oral recommendation to act as usual<sup>21</sup> (Refer to fig. 1). The oral and written advice were delivered at the day of inclusion. The neck collar and active mobilisation interventions involved contact to a physical therapist for a maximum of six weeks. Details about the interventions are reported elsewhere.<sup>20 21</sup> No significant differences in treatment effects were demonstrated and participants are therefore considered one cohort for the present study. The study was approved by the

*Stratification method for whiplash injuries*

1  
2  
3 local ethical committees (The Scientific Committee for The Counties of Vejle  
4 and Funen, Project number 20000268) and conducted in accordance with the  
5  
6  
7  
8 Helsinki II Declaration.  
9

**Study population**

10  
11  
12  
13  
14 The cohort has been previously described.<sup>11 20-22</sup> In short, persons with  
15  
16  
17 complaints from the neck and/or shoulder girdle (WAD grade I-III) seeking  
18  
19  
20 care at an emergency unit or a general practitioner within 72 hours after a  
21  
22  
23 motor vehicle collision were potential participants. Other inclusion criteria  
24  
25  
26 were: Age 18-70 years, exposure to a rear- or frontal-end car accident, and  
27  
28  
29 that an examination could be performed within 10 days after the injury.

30  
31  
32 Exclusion criteria were inability to read and speak Danish, injuries with  
33  
34  
35 fractures or dislocations (WAD grade IV), additional trauma other than the  
36  
37  
38 whiplash injury, pre-existing significant somatic or psychiatric disease, known  
39  
40  
41 active alcohol or drug abuse, and significant headache or neck pain (self-  
42  
43  
44 reported average pain during the preceding six months exceeding 2 on a 0-10  
45  
46  
47 box scale, 0=no pain; 10=worst possible pain).

**Risk Stratification Index Measures**

48  
49  
50 Pain: Neck pain and headache since the collision were scored on an eleven-  
51  
52  
53 point Numeric Rating Scale (0= no pain; 10=worst imaginable pain)<sup>23 24</sup>.  
54  
55  
56  
57  
58  
59  
60

*Stratification method for whiplash injuries*

1  
2  
3 Non-painful complaints: Participants were asked whether any of eleven non-  
4  
5 painful complaints (paresthesia, dizziness, vision disturbances, tinnitus,  
6  
7 hyperacusis, dysphagia, fatigue, irritation, concentration disturbances,  
8  
9 memory difficulties, and sleep disturbances) had started or been markedly  
10  
11 worse since the accident.  
12  
13  
14

15  
16  
17  
18 Active neck mobility: Total CROM (CROM=cervical range of motion)  
19  
20 including flexion, extension, right and left lateral-flexion, and right and left  
21  
22 rotation was assessed with a CROM device as formerly described.<sup>22 26</sup>  
23  
24  
25  
26  
27  
28

29 The risk stratification was performed by combining scores on pain intensity,  
30  
31 CROM and number of non-painful complaints.<sup>19</sup> Each factor was categorised  
32  
33 and scored as follows:  
34  
35

36 The highest score of neck pain and headache was categorised into: 0-2=0  
37  
38 points; 3-4=1 point; 5-8=4 points, 9-10=6 points.  
39  
40

41 Total active CROM was divided into: Below 200 degrees=10 points; 200-  
42  
43 220=8 points; 221-240=6 points; 241-260=4 points; 261-280=2 points; above  
44  
45 280=0 points.  
46  
47

48 Number-of non-painful complaints: 0-2=0 points; 3-5=1 point; 6-11=3 points.  
49  
50  
51  
52  
53  
54  
55  
56  
57  
58  
59  
60

*Stratification method for whiplash injuries*

1  
2  
3 Following stratification was made: Stratum 1=0 points; stratum 2=1-3 points;  
4  
5 stratum 3=4-6 points; stratum 4=7-9 points; stratum 5=10-12 points; stratum  
6  
7  
8 6=13-15 points, and stratum 7=16-19 points .  
9

**Outcome measures**

10  
11  
12  
13  
14 Follow-up questionnaires were posted to participants after 3, 6 and 12  
15  
16 months. Beside data on sick-leave only 12 months follow-up was used for the  
17  
18 present study.  
19  
20  
21

***The primary outcome measure***

22  
23  
24  
25  
26 The primary outcome variable selected a priori was 1-year work disability,  
27  
28 which was defined as: a) sick leave > 3 months during the last 6 months; b)  
29  
30 work inability during the entire last month; or c) not working anymore because  
31  
32 of the accident. <sup>18</sup>  
33  
34  
35

36  
37 The number of days on sick leave was computed by means of a completed  
38  
39 diary (a patient log) and questionnaire data after 3, 6, and 12 months post-  
40  
41 injury. Days with sick leave counted as full days and days with reduced  
42  
43 working hours counted as half days of sick leave. If the patient could manage  
44  
45 a full-time job but had changed functions after injury, it counted as full working  
46  
47 hours. Patients who did not work prior to the injury (on leave, unemployed,  
48  
49 disability pension, retired) were not considered in the calculated risk of 1-year  
50  
51  
52  
53  
54  
55  
56  
57  
58  
59  
60

*Stratification method for whiplash injuries*

1  
2  
3 work disability but were included in computation of the secondary outcome  
4  
5 measures, which have been described elsewhere.<sup>20 21</sup>  
6  
7

#### 8 Other outcome measures

9  
10 Work related factors: Expected difficulties with work were measured by  
11 asking “How big a problem do you expect it to be to take care of your  
12  
13 job/study six weeks from now?” (0=no problem at all; 10=A very big problem,  
14  
15 cannot work), and “How likely do you consider it that you will be  
16  
17 working/studying 6 weeks from now?” (0=very likely; 10=very unlikely). Self-  
18  
19 rated physical work demands were registered asking: “How physical  
20  
21 demanding do you consider your present/most recent job” (0=not physical  
22  
23 demanding at all; 10=very physical demanding).  
24  
25  
26  
27  
28  
29  
30  
31  
32  
33

34 Post-traumatic Stress Response: Was measured by means of the Impact of  
35  
36 Event Scale (IES)<sup>25</sup>. A total sum-score was calculated from all 15 items of  
37  
38 the scale. In addition, an intrusion score (sum of 7 items) and an avoidance  
39  
40 score (sum of 8 items) were calculated.  
41  
42  
43  
44  
45  
46

47 Pressure algometry: The handheld Algometer (Somedic Algometer type 2™ )  
48  
49 was applied with a slope of 30kpa/sec and a probe area of 1.0 sq.cm,  
50  
51 pressure pain detection thresholds (PPDT) were measured in triplets,  
52  
53  
54  
55  
56  
57  
58  
59  
60

*Stratification method for whiplash injuries*

whereas pressure pain tolerance thresholds (PPT) were measured by one application of pressure only.<sup>11</sup>

Methodical muscle palpation was performed bilaterally at nine sites: 1) the anterior part of the temporal muscle, 2) the posterior part of the temporal muscle, 3) the masseter muscle, 4) the lateral pterygoid muscle, 5) the sternocleid at the mastoid insertion point, 6) the sternocleid at its middle belly, 7) the suboccipital muscle group, 8) the superior trapezius muscle, and 9) the rhomboid muscle along the medial border of the scapula. At each palpation site a pain score (0-4) was obtained<sup>11 27</sup> with:

- 0 equaling neither pain nor reported tenderness,
- 1 equaling complaints of mild pain but no facial contortion (grimace), flinch or withdrawal,
- 2 equaling a moderate pain and degree of facial contortion (grimace) or flinch,
- 3 equaling a severe pain and marked flinch or withdrawal, and
- 4 equaling unbearable pain and withdrawal without palpation.

**Statistical analysis**

Data Analyses were made with Stata 12.0™ (StataCorp, Texas US) and Microsoft Excel 2010 for Windows™. The non-parametric Kruskal Wallis test

*Stratification method for whiplash injuries*

1  
2  
3 was applied for analysis of the strata. Parametric data with normal distribution  
4  
5 or log normal distribution was presented within each risk stratum graphs as  
6  
7 mean  $\pm$  sem values. ROC curves are given for applied individual factors in  
8  
9 the risk assessment score (Supplementary fig.1) and sensitivity, specificity  
10  
11 and positive and negative Likelihood ratios were computed for each stratum  
12  
13 for primary (refer to supplementary table 2). Two-way ANOVAs were applied  
14  
15 for testing eventual variability difference between centres for the clinical  
16  
17 measures.  
18  
19  
20  
21  
22

23 Variability: Palpation, pressure algometry, cervical range of motion  
24  
25 measurement were standardised at group meetings during the observation  
26  
27 period to reduce eventual inter-tester and intra-tester variability.  
28  
29  
30  
31  
32  
33  
34  
35  
36  
37  
38  
39  
40  
41  
42  
43  
44  
45  
46  
47  
48  
49  
50  
51  
52  
53  
54  
55  
56  
57  
58  
59  
60

*Stratification method for whiplash injuries***Results**

Details of the study population has been described previously, a flow chart is presented in figure 1.<sup>22</sup> Briefly, a total of 1495 [F/M: 898/597] acute whiplash patients were contacted after being examined at the emergency units or by their general practitioners. Six hundred and eighty-eight eligible acute whiplash patients [F/M: 443/252] gave informed written and verbal consent to participate. Of these, 30 were unemployed, but considered capable of working before injury, 10 were either retired or on disability pension and were not considered in primary but only secondary outcome measures. (Social factors are tabulated here<sup>22</sup>).

Two-hundred [F/M: 102/98] patients refused to participate. Five hundred and ninety-two patients were not eligible, and fifteen were excluded due to protocol violation (underreporting of previous neck pain, VAS >5 n= 8; wrong initial group allocation in treatment study, n=7).

Risk strata:

Fig. 2a shows a log-linear relationship between the risk assessment score and the number of days being sick for acute whiplash patients.



*Stratification method for whiplash injuries*

1  
2  
3 Fig. 2b shows distribution in the risk strata after one year of patients a)  
4  
5 returning to work or b) have reduced functional capacity in full-time jobs or c)  
6  
7 being work disabled. Whereas 96% had returned to work in stratum 1, only  
8  
9 32% of previous healthy whiplash-exposed in stratum 7 were back to work  
10  
11 after 1 year (Kruskal-Wallis,  $p < 0.0001$ ).  
12  
13  
14  
15  
16  
17

18  
19 In figures 3a-c the ability to perform work within 6 weeks and the ability to  
20  
21 return to work within 6 weeks and the assessment of the physical job  
22  
23 demands of their present/recent were rated after 5 median days on an NRS-  
24  
25 11-point box scale. Job-related issues were increasingly severe the higher  
26  
27 risk stratum of the patient (Kruskal-Wallis,  $p < 0.0001$ ).  
28  
29  
30  
31  
32  
33

34 The components of the impact of event scale in fig. 4 intrusion and avoidance  
35  
36 and the total IES score were bar-graphed for each stratum. There was an  
37  
38 increase in reported injury-related emotional distress in the risk strata  
39  
40  
41 (Kruskall Wallis,  $p < 0.0001$ ).  
42  
43  
44  
45

46  
47 Figures 5 a-e display the bar graphs of strata representing pressure  
48  
49 algometry for both pain detection and pain tolerance thresholds for the  
50  
51 muscles in the neck region: the masseter and the infraspinatus muscles and  
52  
53  
54  
55  
56  
57  
58  
59  
60

*Stratification method for whiplash injuries*

1  
2  
3 at a remote control site at the left 3rd finger joint. All these psycho-physical  
4  
5 measures are differently distributed in the risk strata (K-W,  $p < 0.0001$ ).  
6  
7

8 The total palpation score was similarly distributed significantly different in risk  
9  
10 strata (K-W  $p < 0.0001$ ) with a score of 6 in stratum 1 and of 24 in stratum 7  
11  
12 (refer to Supplementary figure 2).  
13  
14

15 The Copenhagen Neck Disability Index score after 1 year was significantly  
16  
17 related to risk strata (K-W,  $p < 0.0001$ ) and also 1-year 11-point box score of  
18  
19 shoulder-arm pain, and neck pain, headache and global pain were  
20  
21 significantly related to risk strata ( $p < 0.0001$ ), as well all McGill Pain  
22  
23 Questionnaire derived pain rating indices (PRI-T; PRI-S, PRI-A, PRI-E, PRI-  
24  
25 M) and number of words count (K-W,  $p < 0.0001$  ).  
26  
27  
28

29 Multicenter implications:  
30  
31  
32

33 There were no significant differences regarding distribution of age, gender,  
34  
35 and strata, not either the risk measures of CROM (ANOVA,  $p > 0.19$ ), VAS  
36  
37 neck/headache (ANOVA,  $p > 0.20$ ), non-painful symptoms (ANOVA,  $p > 0.58$ ).  
38  
39 However, there were differences in inter-tester variability for total palpation  
40  
41 (ANOVA,  $p < 0.001$ ), and pressure algometry ( $p < 0.01$ ).  
42  
43  
44  
45

46 Embedded in treatment study  
47  
48

49 The present study was embedded in a treatment study in which patients were  
50  
51 divided into a low risk and a high risk treatment group (see fig.1). A stratified  
52  
53 analysis of the seven strata, split into low and high risk groups yielded no  
54  
55  
56  
57  
58  
59  
60

*Stratification method for whiplash injuries*

1  
2  
3 difference on 1-year work disability based on their given treatment (K-W p  
4  
5  
6 >0.15 for patients in the high risk group; p>0.91 for low risk patients).  
7  
8  
9  
10  
11  
12  
13  
14  
15  
16  
17  
18  
19  
20  
21  
22  
23  
24  
25  
26  
27  
28  
29  
30  
31  
32  
33  
34  
35  
36  
37  
38  
39  
40  
41  
42  
43  
44  
45  
46  
47  
48  
49  
50  
51  
52  
53  
54  
55  
56  
57  
58  
59  
60

For peer review only

*Stratification method for whiplash injuries***Discussion**

This study shows that an early classification of patients into risk strata based on biological and certain psycho-social functions predicts non-recovery. In order to group patients into 7 different strata we used a scaling system resulting from observational findings from a former study. This system included four predefined categories: neck pain intensity, headache intensity, the number of non-painful symptoms and reduced neck mobility. The strata set in the present study was applied in clinical procedures undertaken at a time point where chronic symptoms could not have developed i.e. < median 5 days after injury. The scoring on neck mobility and non-painful symptoms was based on previous observations where a control group was included.<sup>19</sup> The summation score was arbitrarily determined, and it may be argued that if another scoring had been used, other findings might have been ascertained. Nevertheless, the scoring derived from the findings from a prospective observational study of acute whiplash patients (WAD I-III) with an ankle-injured control group in which active neck mobility was the most significant predictor for 1-year work disability.<sup>18</sup> Neck pain / headache intensity as well as a high number of non-painful complaints were also predictive, however, to a lesser extent<sup>18</sup> similar to the present findings (see ROC curves, Fig S1 A-D). In the present work and in our previous studies<sup>18</sup> we used return-to-work and number-of days parameters with sick leaves of 1 year as indicators of 1-

*Stratification method for whiplash injuries*

1  
2  
3 year work disability. The use of sick leave as a parameter of non-recovery  
4  
5 has been discussed previously.<sup>18</sup> It may be argued that sick leaves are not a  
6  
7 direct measure of non-recovery. But as for subjective symptoms such as pain,  
8  
9 it is crucial to select robust and directly quantifiable factors in order to reduce  
10  
11 the risk of investigator bias. Moreover, the fact that all measures concluding  
12  
13 the risk assessment score were completed shortly after injury means that  
14  
15 patients were in all probability prevented from changing their habitual, pre-  
16  
17 injury health belief, which could have been affected by various sources, like  
18  
19 the mass media, healthcare persons, family, or friends.<sup>24 28</sup>  
20  
21

22  
23  
24  
25  
26 Patients were furthermore not informed or being aware of whether they  
27  
28 belonged to a high-risk or a low-risk group, and factors for the risk  
29  
30 assessment score were obtained before randomisation. Biological responses  
31  
32 like neck strength, duration of neck movement<sup>19</sup>, and psychophysical like  
33  
34 muscle tenderness by palpation and pressure algometry and the coldpressor  
35  
36 pain response<sup>19</sup> as well as stressful parameters like fear-avoidance and  
37  
38 intrusion parameters, and work-related issues are logically distributed in the  
39  
40 risk strata. We did however find inter-tester variability for algometry and  
41  
42 palpation, which may need more attention than we offered in this setting (see  
43  
44 methods), and which has been reported in other studies.<sup>29 30</sup> CROM, VAS  
45  
46 neck pain/headache and number of non-painful symptoms did however not  
47  
48 show unacceptable variability in the current study.  
49  
50  
51  
52  
53  
54  
55  
56  
57  
58  
59  
60

*Stratification method for whiplash injuries*

1  
2  
3 The present risk stratification scheme rests on a selected and limited number  
4  
5 of symptoms and signs based on prior observed findings. Legislative and  
6  
7 detailed psycho-social factors were not included in the stratification. Such  
8  
9 factors might also have an impact although the chances are that legislative  
10  
11 issues hardly affect recovery as early as 5 days after injury. There may be  
12  
13 other possible factors that can affect recovery.<sup>31</sup> In the present paper we  
14  
15 suggest a way of stratifying whiplash patients in the acute state in order to  
16  
17 improve the predictive power of prognosis. While the risk strata presented  
18  
19 here need to be tested as prognostic factors in other cohorts in order to  
20  
21 validate our findings, the present study is one of the largest materials in the  
22  
23 literature. Moreover, the system has not yet been tested in relation to its  
24  
25 possible usefulness in guiding clinical decisions about the choice of  
26  
27 treatment. It is a possible downside to risk assessment, that health-care  
28  
29 professionals could make premature or hasty decisions when faced with a  
30  
31 certain patient who scores high on a prognostic scale like ours. With such  
32  
33 scorings health-care professionals might unconsciously associate the  
34  
35 patient's injury with a prognosis of the chronicity type and act accordingly to  
36  
37 some extent. The Quebec Task Force's WAD grading represented a first  
38  
39 attempt to better characterize and identify patients at risk for long-term  
40  
41 consequences after a whiplash injury. However, subsequent studies  
42  
43 demonstrated that the Quebec WAD grading was of little value in predicting  
44  
45  
46  
47  
48  
49  
50  
51  
52  
53  
54  
55  
56  
57  
58  
59  
60

*Stratification method for whiplash injuries*

1  
2  
3 long-term sequelae.<sup>9 32</sup> More recent prospective papers have stressed the  
4  
5 importance of emotional distress and social factors as a risk factors for  
6  
7 reduced recovery,<sup>33</sup> PTSD (post-traumatic stress disorder),<sup>15 33</sup>  
8  
9 catastrophizing,<sup>34</sup> kinesiophobia,<sup>28 31 35</sup> stress-response<sup>36</sup> are factors  
10  
11 associated with the risk of persistent complaints. A trajectory system has  
12  
13 been proposed by Sterling et al<sup>15</sup> including 4 groups from no pain/disability to  
14  
15 severe pain/disability, in accordance with post-traumatic stress, which needs  
16  
17 further validation. It is generally agreed upon, that there is a need for studies  
18  
19 confirming and validating prognostic models and a need for improved models  
20  
21 after acute WAD<sup>37</sup>. Other studies have found post-traumatic stress,<sup>15</sup> the  
22  
23 presence of sensitisation<sup>38</sup> and neck pain and headache intensities to be  
24  
25 predictive of chronic neck disability 1 year after injury.<sup>10 39</sup> These findings are  
26  
27 consistent with the present results. Expectations for recovery<sup>40</sup>, perceived  
28  
29 injustice after the accident<sup>41</sup>. Reduced Active neck mobility has been of  
30  
31 importance in some, but not a majority of prospective studies.<sup>42</sup> It is of  
32  
33 interest when the CROM test on its own reaches an area under the ROC  
34  
35 curve of 0.79 (CI95 0.75:0.85) (see Fig S1. B) in this multi-centre study in  
36  
37 prediction of 1-year work disability. A critical view on design taking other risk  
38  
39 factors into account is however needed also for future prediction studies that  
40  
41 are highly needed in the whiplash area.<sup>37</sup>  
42  
43  
44  
45  
46  
47  
48  
49  
50  
51  
52  
53  
54  
55  
56  
57  
58  
59  
60

*Stratification method for whiplash injuries***Conclusion**

The risk assessment score is applicable and inexpensive. Early identification of whiplash-exposed persons at risk for chronic pain and work disability is important for planning future treatment in scientific studies.

More research is needed at present, but the risk stratification might have a place in the clinic for individual guidance and management of the acute and the sub-acute whiplash patient. Application of the risk assessment score may be a valuable alternative to the present WAD grading system in predicting work disability and pain and certain psychosocial parameters after neck injury. Furthermore, a similar bio-psychosocial risk assessment could be considered in other acute conditions bearing a risk of long-term development of other chronic dysfunctional pain conditions.



*Stratification method for whiplash injuries***Acknowledgements**

Participants were recruited with the help of the staff at the emergency units at hospitals in the 4 former counties of Viborg, Aarhus, Vejle and Funen during the enrolment period. Statistical consulting was provided from Dept. of Statistics, University of Southern Denmark on designing the study. Financial support was provided by an unrestricted grant from The Danish Insurance Association.

*Stratification method for whiplash injuries***Legends**

Figure 1. Flowchart for the Whiplash Study.

Figure 2a. Risk Strata and Number of Sick-Listed Days During First Year After Whiplash Injury

Figure 2b. One Year Recovery from Whiplash Injury in Risk Strata

Figure 3a-C. Initial Numeric Rating Of Work Related Issues in Risk Strata.

Figure 3 A. Expecting Problems Managing Ones Job/Education In 6 Weeks.

Figure 3b. Likelihood of Being Back to Work/Education in 6 Weeks

Figure 3c. Evaluation of the Physical Job Requirement of Current or Most Recent Job/Education

Figure 4. The Impact of Event Scale with Subscales of Intrusion and Avoidance Shown in Risk Strata.

Figure 5 A-E. Pressure Algometry in the Neck and Head and Remote from Injury in Risk Strata. PPT Pressure Pain Tolerance Threshold and PPDT Pressure Pain Detection Threshold (Kilo Pascal, Mean  $\pm$  SEM).

Figure S1 (Supplementary) ROC Curve of Individual Risk Factors

S1 A. Total Risk Score

S1 B. Initial CROM (Negativised Value of Total Cervical Range of Motion)

S1 C. Maximum of Initial VAS<sub>0-10</sub> For Neck Pain/Headache

S1 D. Initial Number of Non-Painful Symptoms

Figure S2 (Supplementary) Initial Total Palpation Score in Risk Strata in Acute Whiplash Patients

*Stratification method for whiplash injuries*

1  
2  
3  
4  
5  
6  
7  
8  
9  
10  
11  
12  
13  
14  
15  
16  
17  
18  
19  
20  
21  
22  
23  
24  
25  
26  
27  
28  
29  
30  
31  
32  
33  
34  
35  
36  
37  
38  
39  
40  
41  
42  
43  
44  
45  
46  
47  
48  
49  
50  
51  
52  
53  
54  
55  
56  
57  
58  
59  
60

For peer review only

### The Danish Whiplash Study Group Risk Score

| Points                      | 0           | 1   | 2       | 3    | 4       | 5 | 6       | 7 | 8       | 9 | 10   |
|-----------------------------|-------------|-----|---------|------|---------|---|---------|---|---------|---|------|
| CROM                        | >280        |     | 261-280 |      | 241-260 |   | 221-240 |   | 200-220 |   | <200 |
| Neck/Head VAS               | 0-2         | 3-4 |         |      | 5-8     |   | 9-10    |   |         |   |      |
| Number of non-pain symptoms |             | 3-5 |         | 6-11 |         |   |         |   |         |   |      |
| Stratum 1                   | = 0 points  |     |         |      |         |   |         |   |         |   |      |
| Stratum 2                   | = 1-3 pts   |     |         |      |         |   |         |   |         |   |      |
| Stratum 3                   | = 4-6 pts   |     |         |      |         |   |         |   |         |   |      |
| Stratum 4                   | = 7-9 pts   |     |         |      |         |   |         |   |         |   |      |
| Stratum 5                   | = 10-12 pts |     |         |      |         |   |         |   |         |   |      |
| Stratum 6                   | = 13-15 pts |     |         |      |         |   |         |   |         |   |      |
| Stratum 7                   | = 16-19 pts |     |         |      |         |   |         |   |         |   |      |

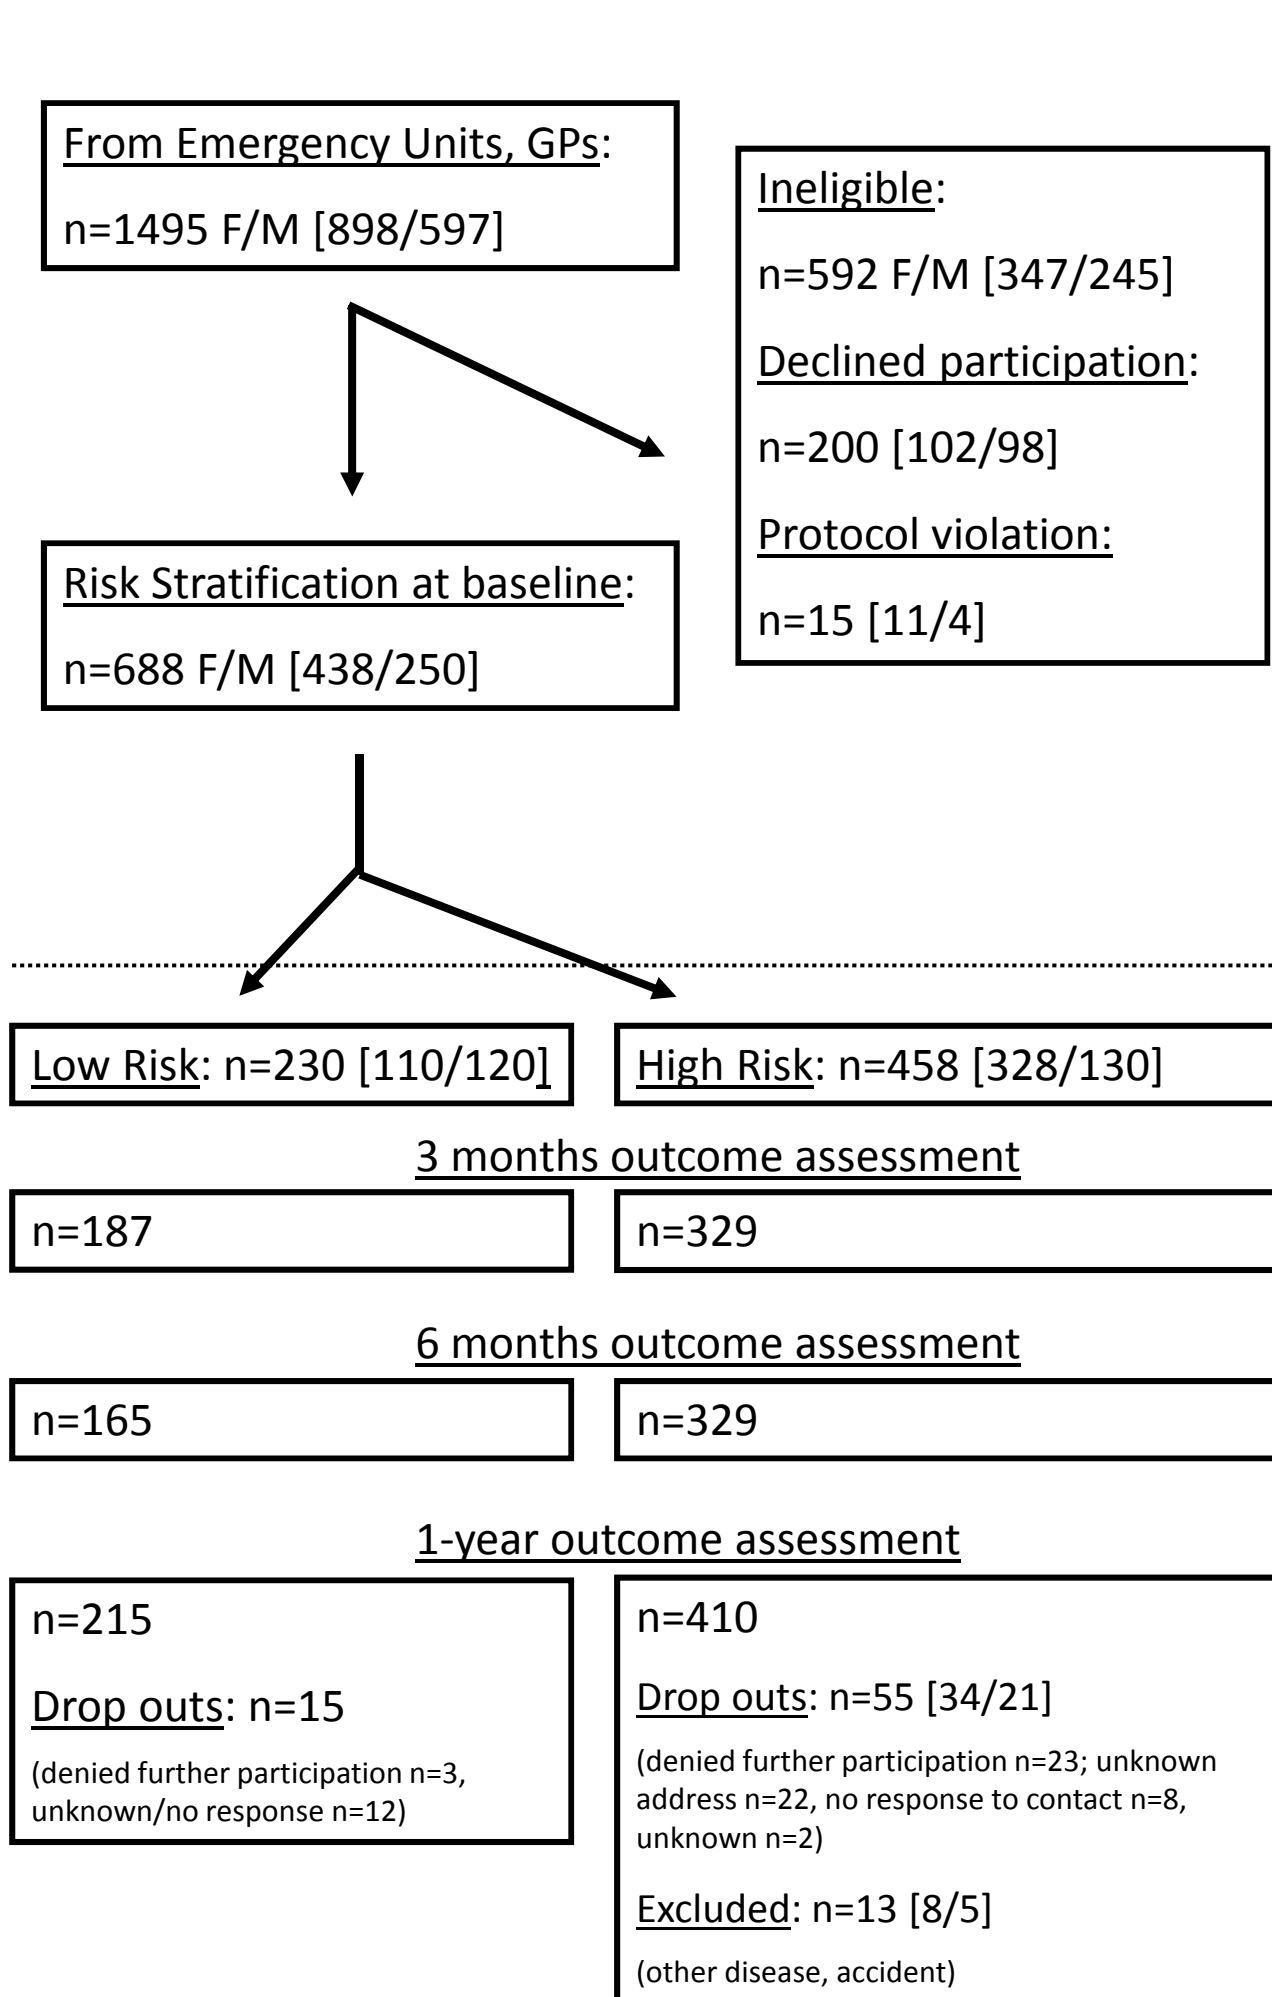

# Stratification and Sick Days during 1st Year

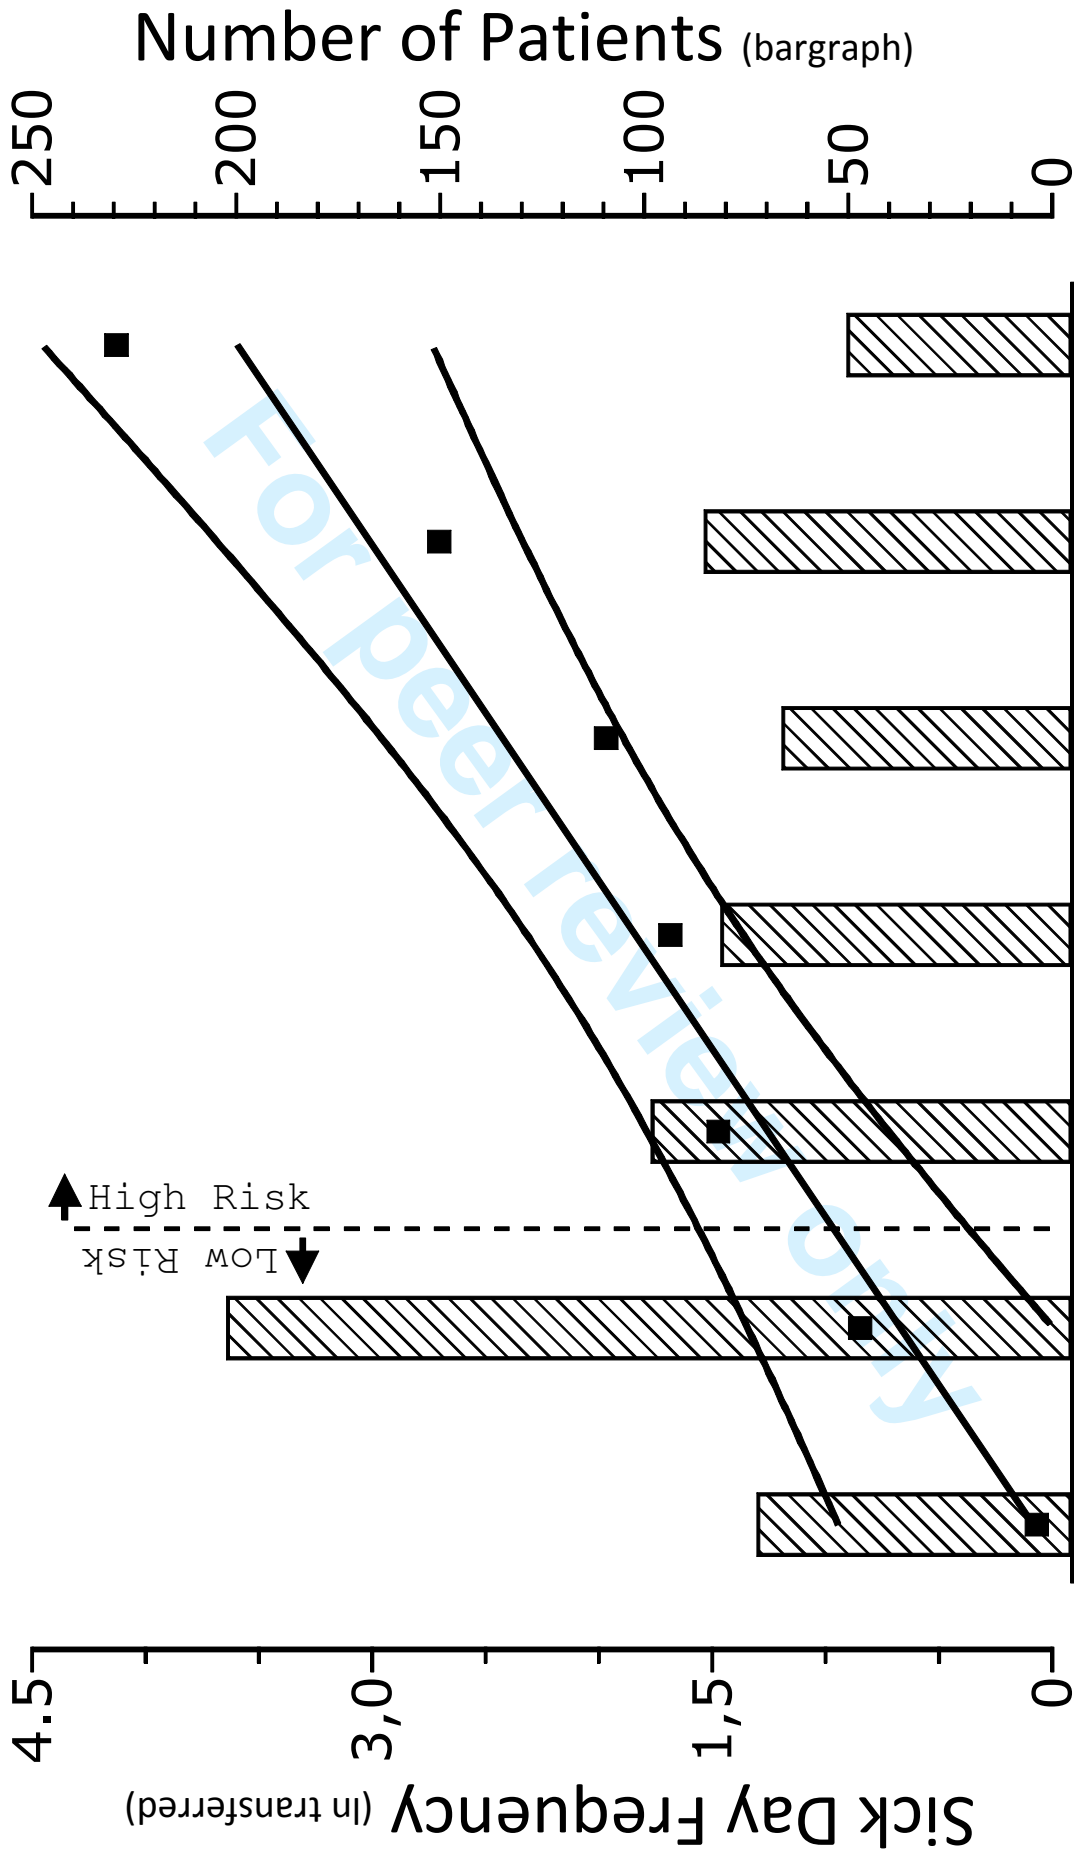

# Stratified whiplash patients and 1-year recovery

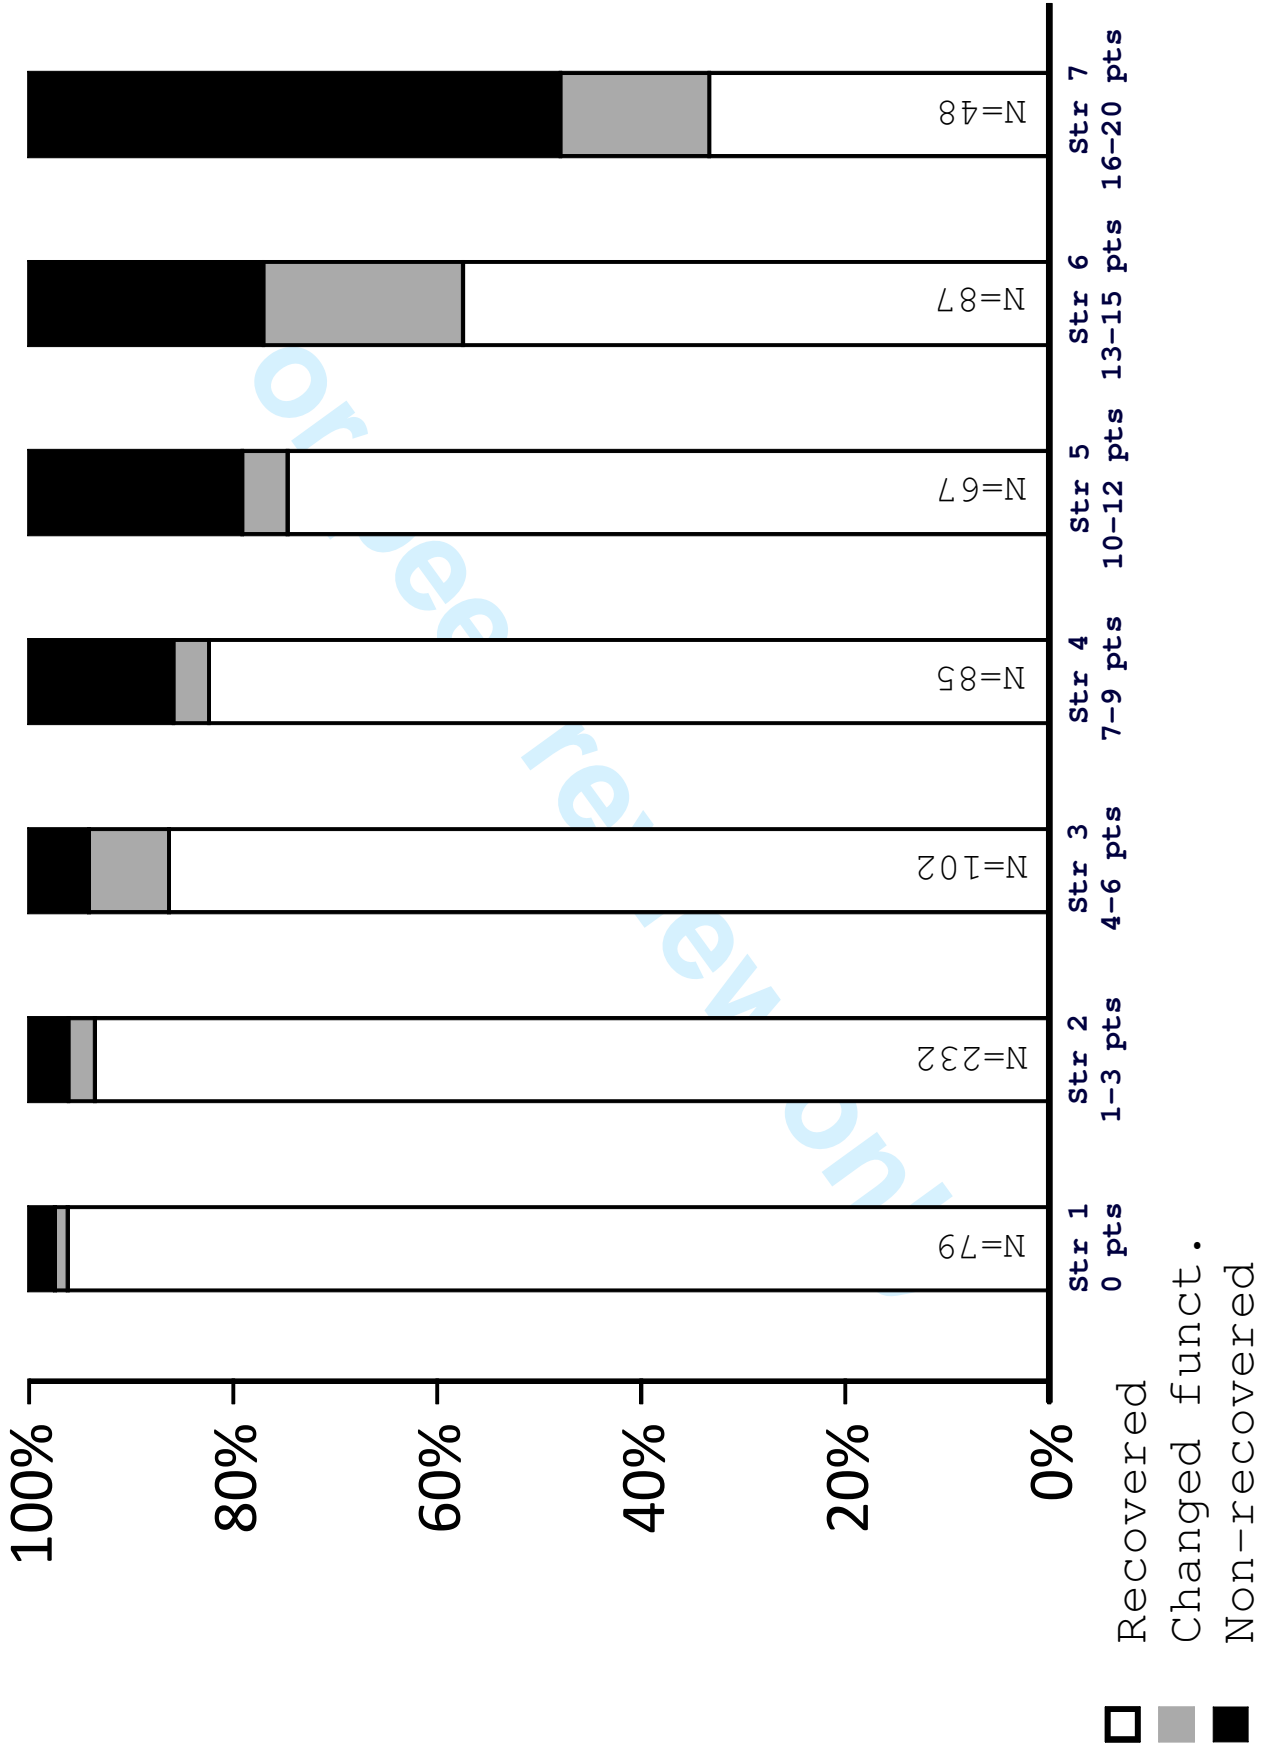

1  
2  
3  
4  
5  
6  
7  
8  
9  
10  
11  
12  
13  
14  
15  
16  
17  
18  
19  
20  
21  
22  
23  
24  
25  
26  
27  
28  
29  
30  
31  
32  
33  
34  
35  
36  
37  
38  
39  
40  
41  
42  
43  
44  
45  
46  
47  
48  
49  
50  
51  
52  
53  
54  
55  
56  
57  
58  
59  
60

Fig. 3a

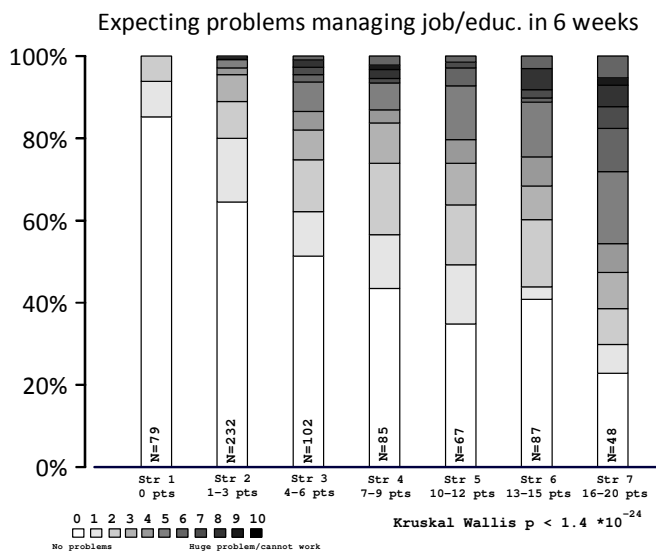

Fig. 3b

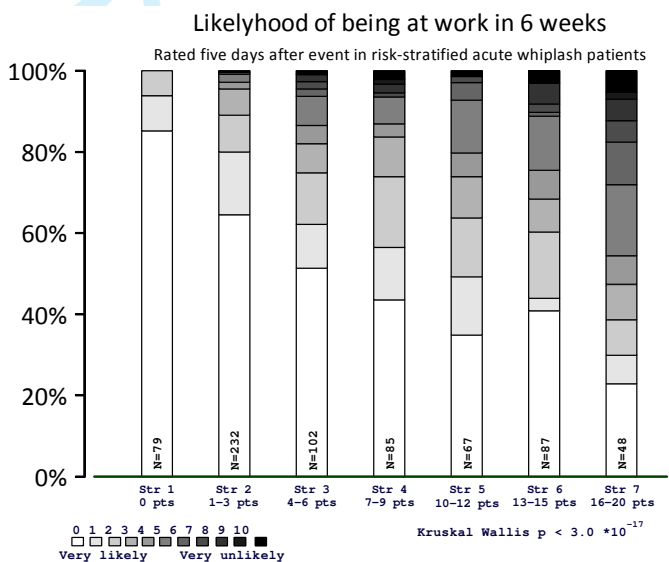

Fig. 3c

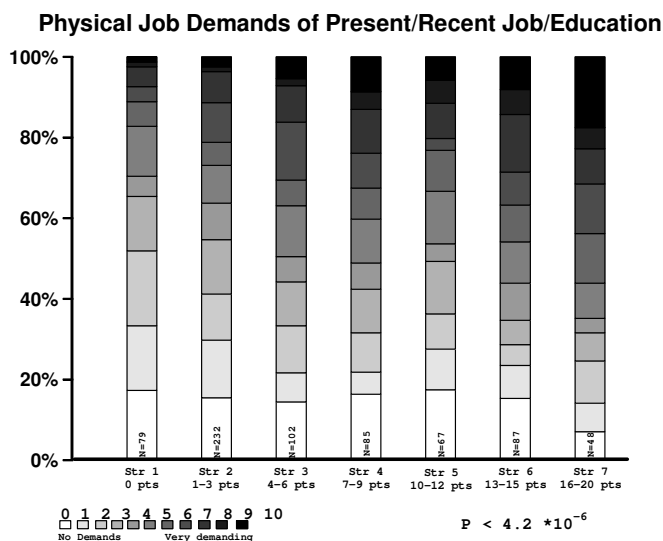



# Impact of Event in 7 Risk Strata

In Acute Whiplash Injury

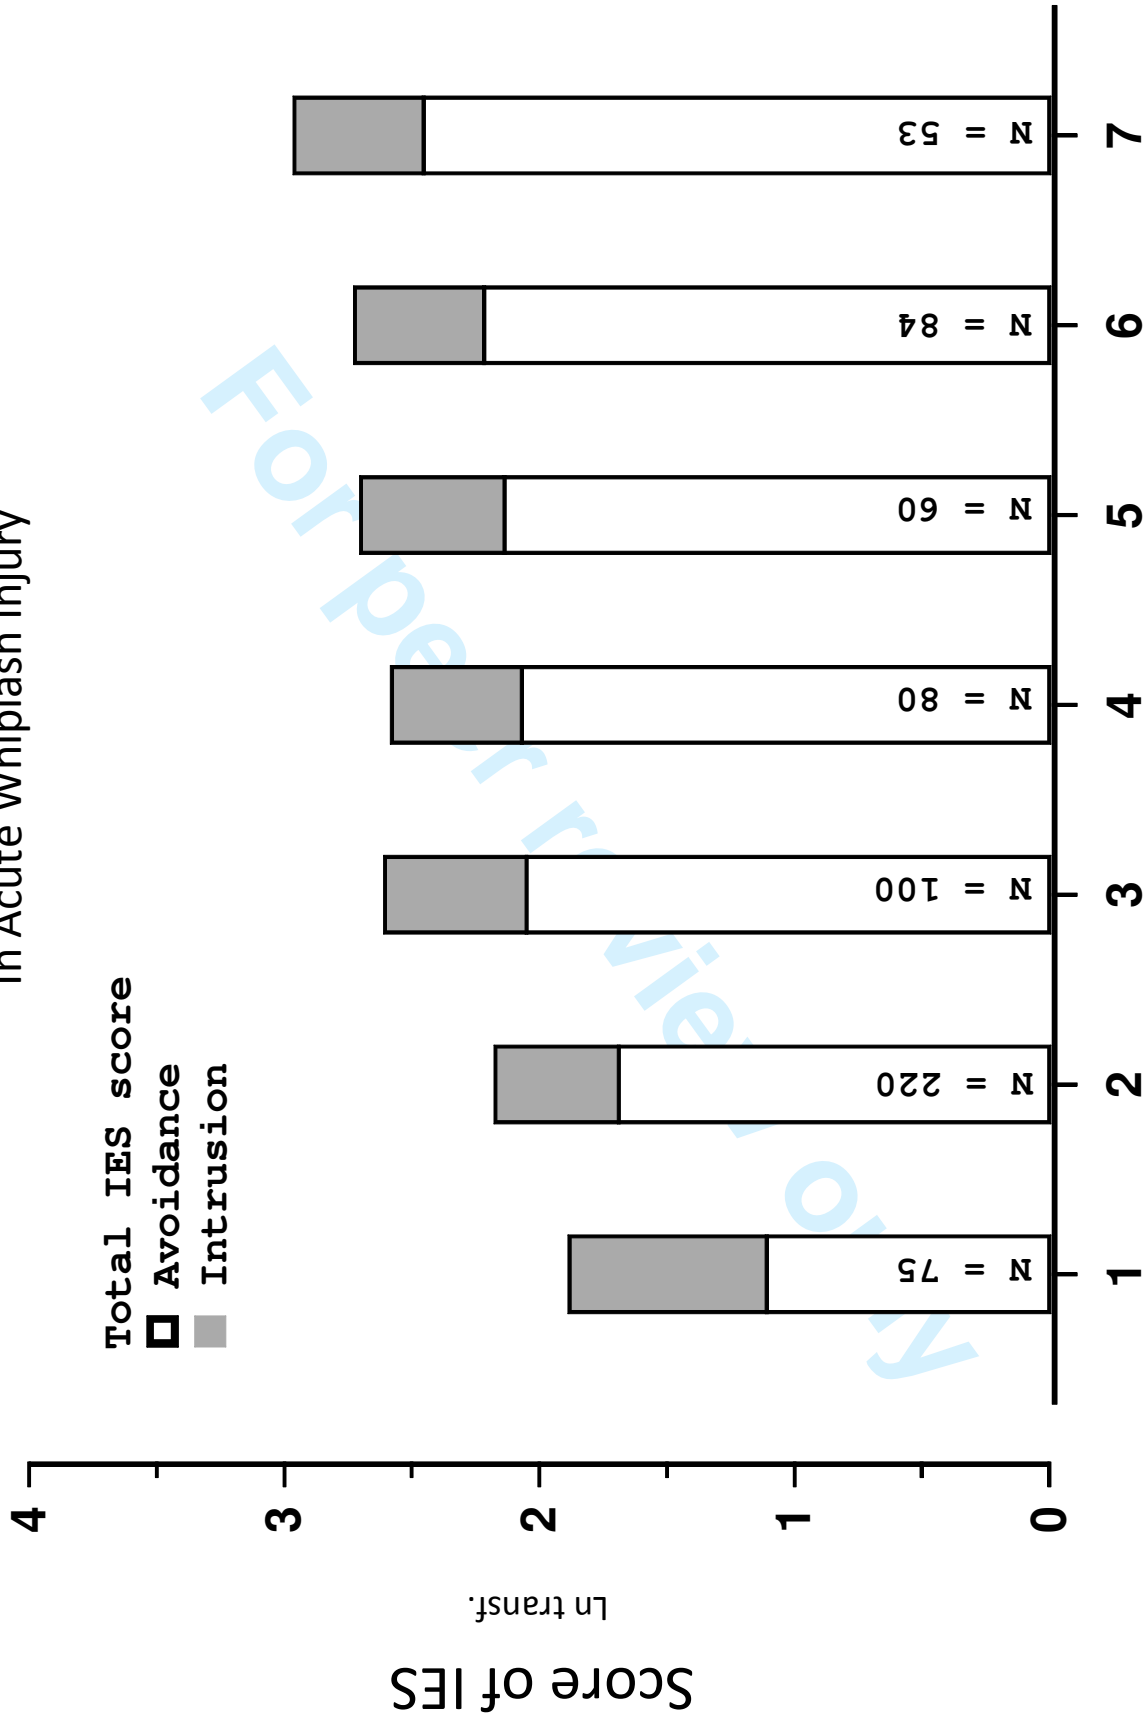

Risk strata 1-7

Kruskal-Wallis,  $p < 6.2 \times 10^{-6}$

1  
2  
3  
4  
5  
6  
7  
8  
9  
10  
11  
12  
13  
14  
15  
16  
17  
18  
19  
20  
21  
22  
23  
24  
25  
26  
27  
28  
29  
30  
31  
32  
33  
34  
35  
36  
37  
38  
39  
40  
41  
42  
43  
44  
45  
46  
47  
48  
49  
50  
51  
52  
53  
54  
55  
56  
57  
58  
59  
60

# Muscle and Joint Pain in Strata

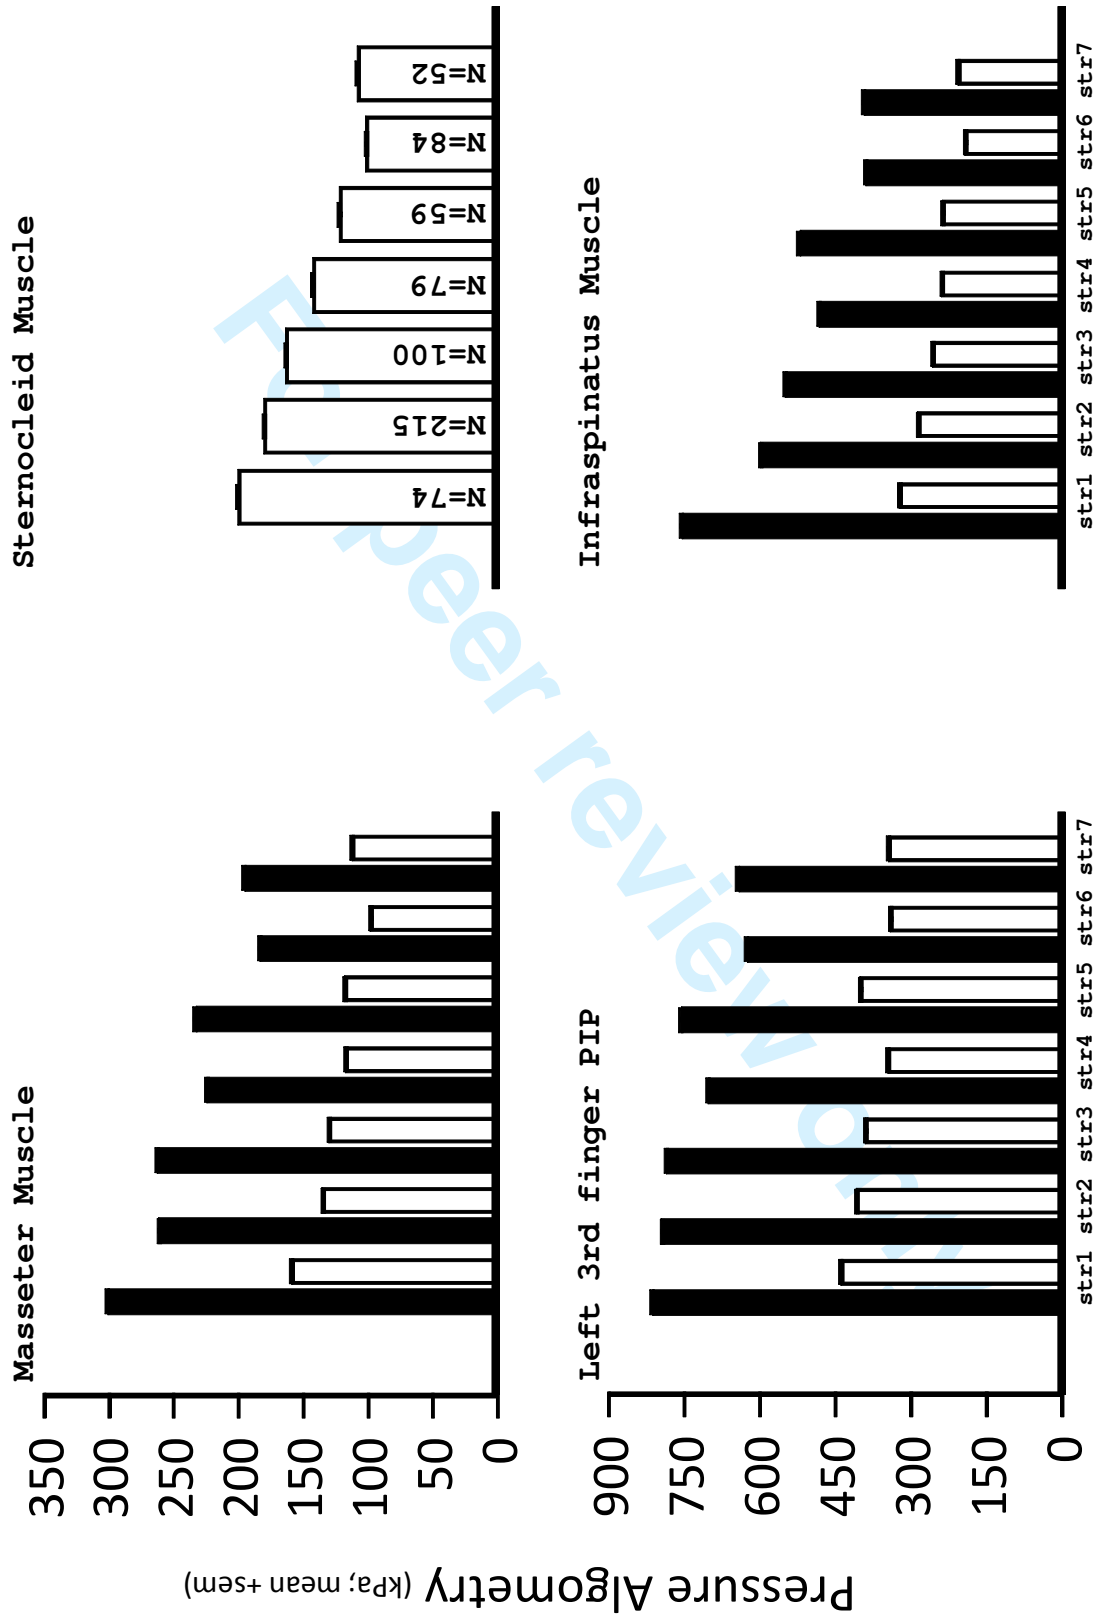

Kruskal Wallis  $p < 0.00001$

■ Pain Tolerance Threshold  
□ Pain Detection Threshold

1  
2  
3  
4  
5  
6  
7  
8  
9  
10  
11  
12  
13  
14  
15  
16  
17  
18  
19  
20  
21  
22  
23  
24  
25  
26  
27  
28  
29  
30  
31  
32  
33  
34  
35  
36  
37  
38  
39  
40  
41  
42  
43  
44  
45  
46  
47  
48  
49  
50  
51  
52  
53  
54  
55  
56  
57  
58  
59  
60

Supplementary figure 1. Receiver Operating Characteristics (ROC) curve. One Year Disability

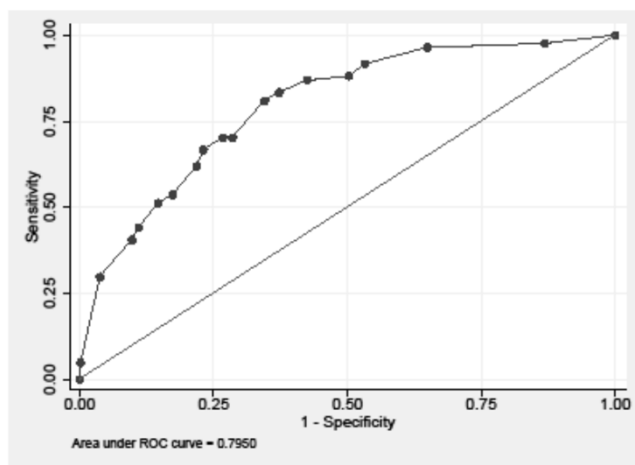

S1 A. Total Risk Score

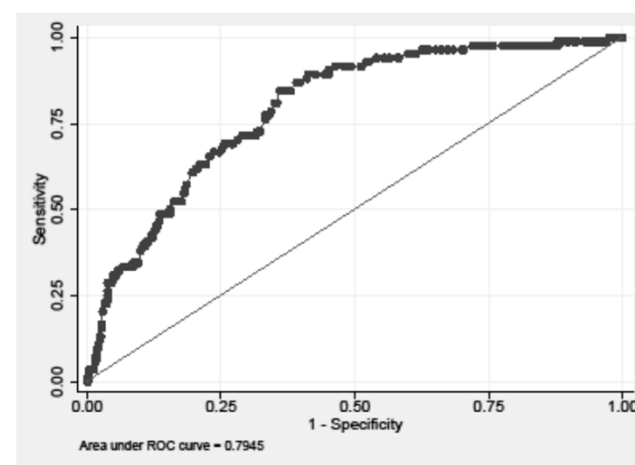

S1 B. CROM (negative)

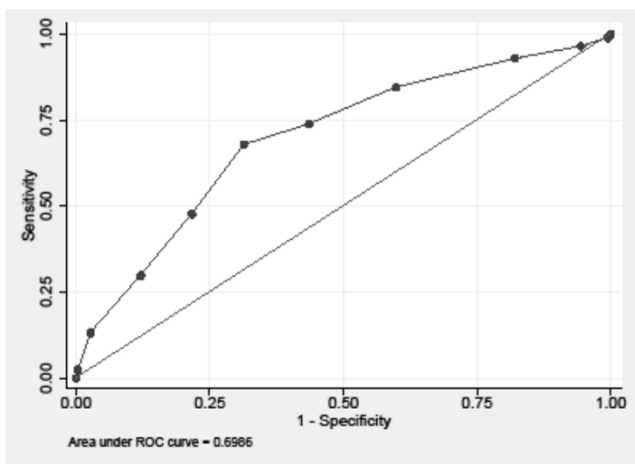

S1 C. Max VAS Neckpain/Headache

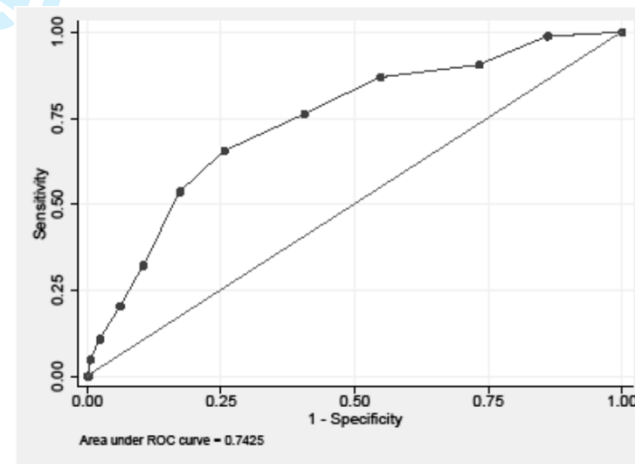

S1 D. Number of Non-Painful Symptoms

1  
2  
3  
4  
5  
6  
7  
8  
9  
10  
11  
12  
13  
14  
15  
16  
17  
18  
19  
20  
21  
22  
23  
24  
25  
26  
27  
28  
29  
30  
31  
32  
33  
34  
35  
36  
37  
38  
39  
40  
41  
42  
43  
44  
45  
46  
47

## Muscle Tenderness in Risk Stratified acute Whiplash Patients

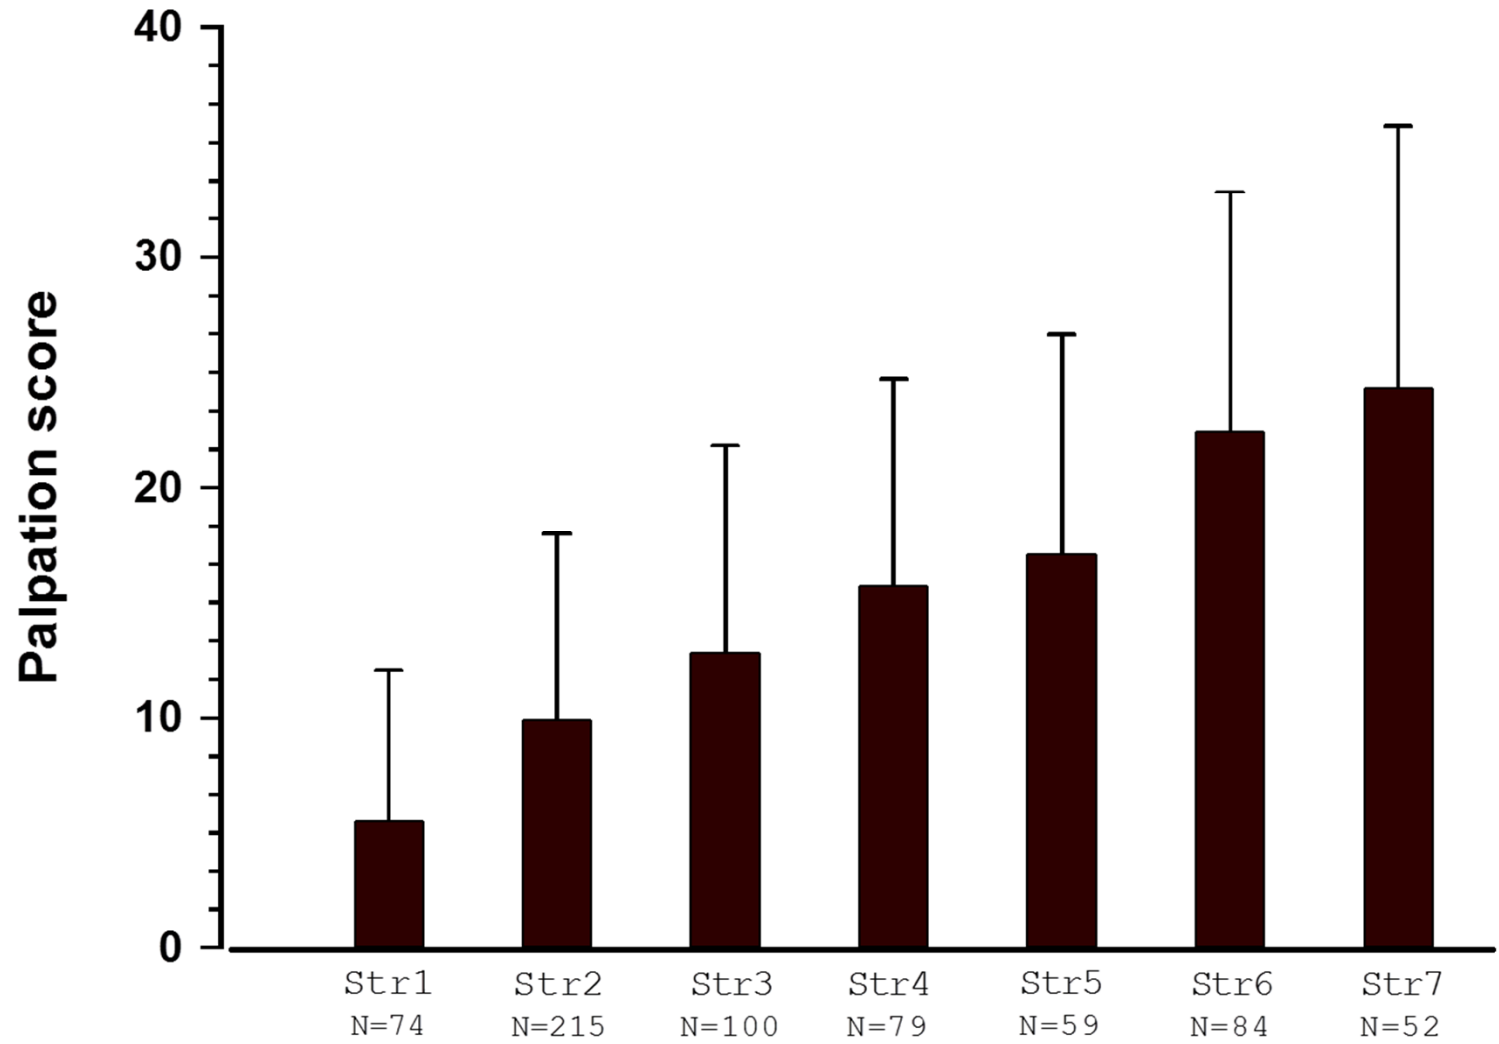

Kruskal Wallis  $P < 4.8 \times 10^{-45}$

Supplementary Table 1. Description of strata in detail

|           | N   | Age<br>(mean) | +/-SD | Gender<br>(F/M) | Likelihood<br>Ratio + | Work Disability       |  | Correctly<br>classified |
|-----------|-----|---------------|-------|-----------------|-----------------------|-----------------------|--|-------------------------|
|           |     |               |       |                 |                       | Likelihood<br>Ratio - |  |                         |
| stratum 1 | 76  | 35.89         | 11.67 | 41/35           | 1.0000                |                       |  | 13.19%                  |
| stratum 2 | 220 | 34.07         | 11.23 | 130/90          | 1.1247                | 0.1804                |  | 24.33%                  |
| stratum 3 | 100 | 35.36         | 12.21 | 63/37           | 1.7524                | 0.2394                |  | 54.79%                  |
| stratum 4 | 80  | 34.81         | 10.93 | 55/25           | 2.3438                | 0.2910                |  | 67.5%                   |
| stratum 5 | 61  | 37.34         | 12.08 | 40/21           | 2.8802                | 0.4337                |  | 75.51%                  |
| stratum 6 | 84  | 31.52         | 9.79  | 65/19           | 3.4949                | 0.5719                |  | 80.85%                  |
| stratum 7 | 53  | 36.79         | 12.29 | 37/16           | 7.8373                | 0.7301                |  | 87.44%                  |
|           |     |               |       |                 |                       | 1.0000                |  | 86.81%                  |

674 patients could be stratified and completed 6-12 months follow-up

*Stratification method for whiplash injuries*

## Heading at BMJ

A new stratified risk assessment tool for whiplash injuries predicts recovery

Helge Kasch, MD, PhD Senior Consultant Neurologist<sup>1)</sup>; Alice Kongsted, DMSc (Clin Biomech), PhD Senior Research fellow<sup>2)</sup>; Erisela Qerama, MD PhD, Consultant Neurophysiologist<sup>3)</sup>; Flemming W. Bach, MD DMSc, Clinical Professor of Neurology<sup>4)</sup>; Tom Bendix, MD DMSc, Clinical Professor of Rheumatology<sup>5)</sup>; Troels Staehelin Jensen MD DMSc, Clinical Professor of Neurology<sup>1)</sup>

- 1) The Danish Pain Research Center, Dept. of Neurology, Aarhus University Hospital, Noerrebrogade 44; DK-8000 Aarhus, Denmark
- 2) Department of Research, Spine Center of Southern Denmark, Hospital Lillebaelt, Institute of Regional Health Research, University of Southern Denmark
- 3) Dept. of Neurophysiology, Aarhus University Hospital, Noerrebrogade 44; DK-8000 Aarhus, Denmark
- 4) Dept. of Neurology, Aarhus University Hospital, Aalborg Hospital, Ladegaardsgade 5 DK-9100 Aalborg, Denmark
- 5) Copenhagen Spine Center, Glostrup Hospital, Ndr. Ringvej 57, 2600-DK, Glostrup, Denmark

*Stratification method for whiplash injuries*

Contact: Helge Kasch, Senior Consultant Neurologist, PhD. The Headache  
Clinic and Danish Pain Research Center, Dept. of Neurology, Aarhus  
University Hospital, Noerrebrogade 44, DK-8000 Aarhus DENMARK.

Email: [helge.kasch@dadlnet.dk](mailto:helge.kasch@dadlnet.dk),

Tel.: + 45 7846 3333

Fax: +45 7846 3300

**Key Words**

Whiplash Injuries, Prognosis, Neck Pain, Headache, Range-of-Motion, Risk  
Factors

Number of figures: 5 + 2 supplemental figures S1 S2

Number of tables: 1, supplemental table 2

Number of words count: 3345 (incl. acknowledgements)

**Correspondence to**

Dr. Helge Kasch, Dept. of Neurology, Aarhus University Hospital,  
Noerrebrogade 44, DK-8000 Aarhus, Denmark. Email

[helge.kasch@dadlnet.dk](mailto:helge.kasch@dadlnet.dk)

Fax: 0045 78463300

## Stratification method for whiplash injuries

### Introduction

Chronic pain represents a major problem in the Western World with approximately 20% of the adult population suffering from chronic pain. Our ability to deal with these chronic pain conditions is insufficient as it is in various other areas, such as traumatic injuries and pain following surgery or other medical procedures. Identifying patients at risk of developing chronic pain is a prerequisite for establishment of prophylactic initiatives.

When discussing pain following surgery, it has been demonstrated that prior pain intensity, the duration of pain, the type of surgery, the nerve damage during surgery as well as psychological factors, information and the setting and the genetic endowment are of significant importance with respect to the future development and persistence of chronic pain.<sup>1-5</sup> Also regarding musculoskeletal pain conditions, such as headache<sup>6</sup>, cervical sprains<sup>7</sup>, and low back pain conditions,<sup>8</sup> there is an interest in exploring the potential risk factors aligned with persistent pain. The specific type of distortion of the cervical spine, stemming from a so-called *whiplash injury*, in which the neck spine is exposed to a forced extension-flexion trauma, is often followed by a late pain state known as whiplash-associated disorders (WAD).<sup>9 10</sup>

These injuries may be associated with a reduction of the pain threshold to mechanical pressure in the neck muscles<sup>11 12</sup>, a reduction of nociceptive

Page 3



*Stratification method for whiplash injuries*

1  
2  
3 flexion reflexes,<sup>13</sup> and an expansion of cutaneously referred pain symptoms  
4  
5 following infusion of hypertonic saline into muscles both at the injury site and  
6  
7 in areas remote from the injury site.<sup>14</sup> These findings suggest generalized  
8  
9 hyper- excitability following a whiplash injury which resolves in patients  
10  
11 recovering after injury but persists in patients with on-going symptoms<sup>2 11 15-17</sup>  
12  
13  
14  
15  
16  
17

18  
19 Whiplash-associated disorders fall into the categories O-IV according to the  
20  
21 Quebec WAD grading.<sup>9</sup> In a previous observation study we found that a risk  
22  
23 score based on neck pain, headache, the number of non-painful symptoms,  
24  
25 and reduced neck mobility to be associated with a marked risk of reduced  
26  
27 recovery.<sup>18</sup> Based on these observations the objective of this study was to  
28  
29 test a stratified risk assessment scoring system for predicting long-term  
30  
31 sequelae after a whiplash injury. A risk index was developed in a previous  
32  
33 cohort and the predictive capability of seven risk strata tested.<sup>18 19</sup> In the  
34  
35 present study we test if the seven risk strata are useful for prediction of  
36  
37 outcome in that second sample. In addition, differences in psychological and  
38  
39 social factors across the strata are described.  
40  
41  
42  
43  
44  
45  
46  
47  
48

## Materials and methods

### Study overview

### *Stratification method for whiplash injuries*

1  
2  
3 A risk stratification index based on measures of intensity of neck pain and  
4  
5 headache, cervical range of motion (CROM), and number of non-painful  
6  
7 complaints was developed in a previous sample of whiplash injured seen in  
8  
9 an emergency care unit.<sup>18</sup> Using a pragmatic approach, seven risk strata  
10  
11 were formed and this stratification was strongly associated with outcome.<sup>19</sup>  
12  
13 In the present study these risk strata are tested in another sample enrolled  
14  
15 between May 2001 and June 2003. The study concludes secondary analysis  
16  
17 of two parallel RCT's.<sup>20 21</sup> Patients were enrolled within 10 days of a whiplash  
18  
19 injury. Those with a low risk stratification index score were randomised to  
20  
21 either oral or written advice to act as usual,<sup>20</sup> whereas patients with high risk  
22  
23 scores were randomised to immobilisation (semi-rigid neck collar), active  
24  
25 mobilisation (McKenzie technique) or the oral recommendation to act as  
26  
27 usual<sup>21</sup> (Refer to fig. 1). The oral and written advice were delivered at the day  
28  
29 of inclusion. The neck collar and active mobilisation interventions involved  
30  
31 contact to a physical therapist for a maximum of six weeks. Details about the  
32  
33 interventions are reported elsewhere.<sup>20 21</sup> No significant differences in  
34  
35 treatment effects were demonstrated and participants are therefore  
36  
37 considered one cohort for the present study. The study was approved by the  
38  
39 local ethical committees (The Scientific Committee for The Counties of Vejle  
40  
41 and Funen, Project number 20000268) and conducted in accordance with the  
42  
43 Helsinki II Declaration.  
44  
45  
46  
47  
48  
49  
50  
51  
52  
53  
54  
55

56  
57 *Page 5*  
58  
59  
60

*Stratification method for whiplash injuries*

## Study population

The cohort has been previously described.<sup>11 20-22</sup> In short, persons with complaints from the neck and/or shoulder girdle (WAD grade I-III) seeking care at an emergency unit or a general practitioner within 72 hours after a motor vehicle collision were potential participants. Other inclusion criteria were: Age 18-70 years, exposure to a rear- or frontal-end car accident, and that an examination could be performed within 10 days after the injury.

Exclusion criteria were inability to read and speak Danish, injuries with fractures or dislocations (WAD grade IV), additional trauma other than the whiplash injury, pre-existing significant somatic or psychiatric disease, known active alcohol or drug abuse, and significant headache or neck pain (self-reported average pain during the preceding six months exceeding 2 on a 0-10 box scale, 0=no pain; 10=worst possible pain).

**Risk Stratification Index Measures**

**Pain:** Neck pain and headache since the collision were scored on an eleven-point Numeric Rating Scale (0= no pain; 10=worst imaginable pain)<sup>23 24</sup>.

**Non-painful complaints:** Participants were asked whether any of eleven non-painful complaints (paresthesia, dizziness, vision disturbances, tinnitus, hyperacusis, dysphagia, fatigue, irritation, concentration disturbances,

### *Stratification method for whiplash injuries*

memory difficulties, and sleep disturbances) had started or been markedly worse since the accident.

Active neck mobility: Total CROM (CROM=cervical range of motion) including flexion, extension, right and left lateral-flexion, and right and left rotation was assessed with a CROM device as formerly described.<sup>22 26</sup>

The risk stratification was performed by combining scores on pain intensity, CROM and number of non-painful complaints.<sup>19</sup> Each factor was categorised and scored as follows:

The highest score of neck pain and headache was categorised into: 0-2=0 points; 3-4=1 point; 5-8=4 points, 9-10=6 points.

Total active CROM was divided into: Below 200 degrees=10 points; 200-220=8 points; 221-240=6 points; 241-260=4 points; 261-280=2 points; above 280=0 points.

Number-of non-painful complaints: 0-2=0 points; 3-5=1 point; 6-11=3 points.

Following stratification was made: Stratum 1=0 points; stratum 2=1-3 points; stratum 3=4-6 points; stratum 4=7-9 points; stratum 5=10-12 points; stratum 6=13-15 points, and stratum 7=16-19 points .

Outcome measures

*Page 7*

*Stratification method for whiplash injuries*

1  
2  
3 Follow-up questionnaires were posted to participants after 3, 6 and 12  
4  
5 months. Beside data on sick-leave only 12 months follow-up was used for the  
6  
7 present study.  
8  
9

***The primary outcome measure***

10  
11  
12 The primary outcome variable selected a priori was 1-year work disability,  
13  
14 which was defined as: a) sick leave > 3 months during the last 6 months; b)  
15  
16 work inability during the entire last month; or c) not working anymore because  
17  
18 of the accident.<sup>18</sup>  
19  
20  
21  
22  
23  
24

25 The number of days on sick leave was computed by means of a completed  
26  
27 diary (a patient log) and questionnaire data after 3, 6, and 12 months post-  
28  
29 injury. Days with sick leave counted as full days and days with reduced  
30  
31 working hours counted as half days of sick leave. If the patient could manage  
32  
33 a full-time job but had changed functions after injury, it counted as full working  
34  
35 hours. Patients who did not work prior to the injury (on leave, unemployed,  
36  
37 disability pension, retired) were not considered in the calculated risk of 1-year  
38  
39 work disability but were included in computation of the secondary outcome  
40  
41 measures, which have been described elsewhere.<sup>20 21</sup>  
42  
43  
44  
45  
46  
47

***Other outcome measures***

48  
49  
50 Work related factors: Expected difficulties with work were measured by  
51  
52 asking "How big a problem do you expect it to be to take care of your  
53  
54  
55  
56  
57  
58  
59  
60

*Page 8*

*Stratification method for whiplash injuries*

1  
2  
3 job/study six weeks from now?" (0=no problem at all; 10=A very big problem,  
4  
5 cannot work), and "How likely do you consider it that you will be  
6  
7  
8 working/studying 6 weeks from now?" (0=very likely; 10=very unlikely). Self-  
9  
10 rated physical work demands were registered asking: "How physical  
11  
12 demanding do you consider your present/most recent job" (0=not physical  
13  
14 demanding at all; 10=very physical demanding).  
15  
16  
17  
18  
19  
20

21 Post-traumatic Stress Response: Was measured by means of the Impact of  
22  
23 Event Scale (IES) <sup>25</sup>. A total sum-score was calculated from all 15 items of  
24  
25 the scale. In addition, an intrusion score (sum of 7 items) and an avoidance  
26  
27 score (sum of 8 items) were calculated.  
28  
29  
30  
31  
32  
33

34 Pressure algometry: The handheld Algometer (Somedic Algometer type 2™ )  
35  
36 was applied with a slope of 30kpa/sec and a probe area of 1.0 sq.cm,  
37  
38 pressure pain detection thresholds (PPDT) were measured in triplets,  
39  
40 whereas pressure pain tolerance thresholds (PPT) were measured by one  
41  
42 application of pressure only. <sup>11</sup>  
43  
44  
45  
46  
47  
48  
49

50 Methodical muscle palpation was performed bilaterally at nine sites: 1) the  
51  
52 anterior part of the temporal muscle, 2) the posterior part of the temporal  
53  
54 muscle, 3) the masseter muscle, 4) the lateral pterygoid muscle, 5) the  
55  
56  
57  
58  
59  
60

*Page 9*

*Stratification method for whiplash injuries*

1  
2  
3 sternocleid at the mastoid insertion point, 6) the sternocleid at its middle belly,  
4  
5  
6 7) the suboccipital muscle group, 8) the superior trapezius muscle, and 9) the  
7  
8 rhomboid muscle along the medial border of the scapula. At each palpation  
9  
10 site a pain score (0-4) was obtained<sup>11 27</sup> with:

- 13 • 0 equaling neither pain nor reported tenderness,  
14
- 15 • 1 equaling complaints of mild pain but no facial contortion  
16 (grimace), flinch or withdrawal,  
17
- 18 • 2 equaling a moderate pain and degree of facial contortion  
19 (grimace) or flinch,  
20
- 21 • 3 equaling a severe pain and marked flinch or withdrawal, and  
22
- 23 • 4 equaling unbearable pain and withdrawal without palpation.  
24  
25  
26  
27  
28  
29  
30  
31  
32  
33

## Statistical analysis

34  
35  
36  
37 Data Analyses were made with Stata 12.0™ (StataCorp, Texas US) and  
38  
39 Microsoft Excel 2010 for Windows™. The non-parametric Kruskal Wallis test  
40  
41 was applied for analysis of the strata. Parametric data with normal distribution  
42  
43 or log normal distribution was presented within each risk stratum graphs as  
44  
45 mean ± sem values. ROC curves are given for applied individual factors in  
46  
47 the risk assessment score (Supplementary fig.1) and sensitivity, specificity  
48  
49 and positive and negative Likelihood ratios were computed for each stratum  
50  
51  
52  
53  
54  
55

*Stratification method for whiplash injuries*

1  
2  
3 for primary (refer to supplementary table 2). Two-way ANOVAs were applied  
4  
5 for testing eventual variability difference between centres for the clinical  
6  
7  
8 measures.  
9

10 **Variability: Palpation, pressure algometry, cervical range of motion**

11  
12 **measurement were standardised at group meetings during the observation**

13  
14 **period to reduce eventual inter-tester and intra-tester variability.**  
15  
16  
17  
18  
19  
20  
21  
22  
23  
24  
25  
26  
27  
28  
29  
30  
31  
32  
33  
34  
35  
36  
37  
38  
39  
40  
41  
42  
43  
44  
45  
46  
47  
48  
49  
50  
51  
52  
53  
54  
55



*Stratification method for whiplash injuries*

## Results

Details of the study population has been described previously, a flow chart is presented in figure 1.<sup>22</sup> Briefly, a total of 1495 [F/M: 898/597] acute whiplash patients were contacted after being examined at the emergency units or by their general practitioners. Six hundred and eighty-eight eligible acute whiplash patients [F/M: 443/252] gave informed written and verbal consent to participate. Of these, 30 were unemployed, but considered capable of working before injury, 10 were either retired or on disability pension and were not considered in primary but only secondary outcome measures. (Social factors are tabulated here<sup>22</sup>).

Two-hundred [F/M: 102/98] patients refused to participate. Five hundred and ninety-two patients were not eligible, and fifteen were excluded due to protocol violation (underreporting of previous neck pain, VAS >5 n= 8; wrong initial group allocation in treatment study, n=7).

Risk strata:

Fig. 2a shows a log-linear relationship between the risk assessment score and the number of days being sick for acute whiplash patients.

Page 12

*Stratification method for whiplash injuries*

1  
2  
3 Fig. 2b shows distribution in the risk strata after one year of patients a)  
4  
5 returning to work or b) have reduced functional capacity in full-time jobs or c)  
6  
7  
8 being work disabled. Whereas 96% had returned to work in stratum 1, only  
9  
10  
11 32% of previous healthy whiplash-exposed in stratum 7 were back to work  
12  
13 after 1 year (Kruskal-Wallis,  $p < 0.0001$ ).  
14  
15

16  
17  
18 In figures 3a-c the ability to perform work within 6 weeks and the ability to  
19  
20 return to work within 6 weeks and the assessment of the physical job  
21  
22 demands of their present/recent were rated after 5 median days on an NRS-  
23  
24 11-point box scale. Job-related issues were increasingly severe the higher  
25  
26 risk stratum of the patient (Kruskal-Wallis,  $p < 0.0001$ ).  
27  
28  
29  
30  
31

32  
33  
34 The components of the impact of event scale in fig. 4 intrusion and avoidance  
35  
36 and the total IES score were bar-graphed for each stratum. There was an  
37  
38 increase in reported injury-related emotional distress in the risk strata  
39  
40  
41 (Kruskall Wallis,  $p < 0.0001$ ).  
42  
43  
44  
45

46  
47 Figures 5 a-e display the bar graphs of strata representing pressure  
48  
49 algometry for both pain detection and pain tolerance thresholds for the  
50  
51 muscles in the neck region: the masseter and the infraspinatus muscles and  
52  
53  
54  
55

*Stratification method for whiplash injuries*

at a remote control site at the left 3rd finger joint. All these psycho-physical measures are differently distributed in the risk strata (K-W,  $p < 0.0001$ ).

The total palpation score was similarly distributed significantly different in risk strata (K-W  $p < 0.0001$ ) with a score of 6 in stratum 1 and of 24 in stratum 7 (refer to Supplementary figure 2).

The Copenhagen Neck Disability Index score after 1 year was significantly related to risk strata (K-W,  $p < 0.0001$ ) and also 1-year 11-point box score of shoulder-arm pain, and neck pain, headache and global pain were significantly related to risk strata ( $p < 0.0001$ ), as well all McGill Pain Questionnaire derived pain rating indices (PRI-T; PRI-S, PRI-A, PRI-E, PRI-M) and number of words count (K-W,  $p < 0.0001$ ).

Multicenter implications:

There were no significant differences regarding distribution of age, gender, and strata, not either the risk measures of CROM (ANOVA,  $p > 0.19$ ), VAS neck/headache (ANOVA,  $p > 0.20$ ), non-painful symptoms (ANOVA,  $p > 0.58$ ). However, there were differences in inter-tester variability for total palpation (ANOVA,  $p < 0.001$ ), and pressure algometry ( $p < 0.01$ ).

Embedded in treatment study

The present study was embedded in a treatment study in which patients were divided into a low risk and a high risk treatment group (see fig.1). A stratified analysis of the seven strata, split into low and high risk groups yielded no

*Page 14*

*Stratification method for whiplash injuries*

1  
2  
3 difference on 1-year work disability based on their given treatment (K-W p  
4  
5  
6 >0.15 for patients in the high risk group; p>0.91 for low risk patients).  
7  
8  
9  
10  
11  
12  
13  
14  
15  
16  
17  
18  
19  
20  
21  
22  
23  
24  
25  
26  
27  
28  
29  
30  
31  
32  
33  
34  
35  
36  
37  
38  
39  
40  
41  
42  
43  
44  
45  
46  
47  
48  
49  
50  
51  
52  
53  
54  
55  
56  
57  
58  
59  
60

*Stratification method for whiplash injuries*

## Discussion

This study shows that an early classification of patients into risk strata based on biological and certain psycho-social functions predicts non-recovery. In order to group patients into 7 different strata we used a scaling system resulting from observational findings from a former study. This system included four predefined categories: neck pain intensity, headache intensity, the number of non-painful symptoms and reduced neck mobility. The strata set in the present study was applied in clinical procedures undertaken at a time point where chronic symptoms could not have developed i.e. < median 5 days after injury. The scoring on neck mobility and non-painful symptoms was based on previous observations where a control group was included.<sup>19</sup> The summation score was arbitrarily determined, and it may be argued that if another scoring had been used, other findings might have been ascertained. Nevertheless, the scoring derived from the findings from a prospective observational study of acute whiplash patients (WAD I-III) with an ankle-injured control group in which active neck mobility was the most significant predictor for 1-year work disability.<sup>18</sup> Neck pain / headache intensity as well as a high number of non-painful complaints were also predictive, however, to a lesser extent<sup>18</sup> similar to the present findings (see ROC curves, Fig S1 A-D). In the present work and in our previous studies<sup>18</sup> we used return-to-work and number-of days parameters with sick leaves of 1 year as indicators of 1-

*Page 16*

*Stratification method for whiplash injuries*

1  
2  
3 **year work disability**. The use of sick leave as a parameter of non-recovery  
4  
5 has been discussed previously.<sup>18</sup> It may be argued that sick leaves are not a  
6  
7 direct measure of non-recovery. But as for subjective symptoms such as pain,  
8  
9 it is crucial to select robust and directly quantifiable factors in order to reduce  
10  
11 the risk of investigator bias. Moreover, the fact that all measures concluding  
12  
13 the risk assessment score were completed shortly after injury means that  
14  
15 patients were in all probability prevented from changing their habitual, pre-  
16  
17 injury health belief, which could have been affected by various sources, like  
18  
19 the mass media, healthcare persons, family, or friends.<sup>24 28</sup>

20  
21 Patients were furthermore not informed or being aware of whether they  
22  
23 belonged to a high-risk or a low-risk group, and factors for the risk  
24  
25 assessment score were obtained before randomisation. Biological responses  
26  
27 like neck strength, duration of neck movement<sup>19</sup>, and psychophysical like  
28  
29 muscle tenderness by palpation and pressure algometry and the coldpressor  
30  
31 pain response<sup>19</sup> as well as stressful parameters like fear-avoidance and  
32  
33 intrusion parameters, and work-related issues are logically distributed in the  
34  
35 risk strata. We did however find inter-tester variability for algometry and  
36  
37 palpation, which may need more attention than we offered in this setting (see  
38  
39 methods), and which has been reported in other studies.<sup>29 30</sup> CROM, VAS  
40  
41 neck pain/headache and number of non-painful symptoms did however not  
42  
43 show unacceptable variability in the current study.

44  
45  
46  
47  
48  
49  
50  
51  
52  
53  
54  
55  
56  
57 *Page 17*

*Stratification method for whiplash injuries*

1  
2  
3 The present risk stratification scheme rests on a selected and limited number  
4  
5 of symptoms and signs based on prior observed findings. Legislative and  
6  
7 detailed psycho-social factors were not included in the stratification. Such  
8  
9 factors might also have an impact although the chances are that legislative  
10  
11 issues hardly affect recovery as early as 5 days after injury. There may be  
12  
13 other possible factors that can affect recovery.<sup>31</sup> In the present paper we  
14  
15 suggest a way of stratifying whiplash patients in the acute state in order to  
16  
17 improve the predictive power of prognosis. While the risk strata presented  
18  
19 here need to be tested as prognostic factors in other cohorts in order to  
20  
21 validate our findings, the present study is one of the largest materials in the  
22  
23 literature. Moreover, the system has not yet been tested in relation to its  
24  
25 possible usefulness in guiding clinical decisions about the choice of  
26  
27 treatment. It is a possible downside to risk assessment, that health-care  
28  
29 professionals could make premature or hasty decisions when faced with a  
30  
31 certain patient who scores high on a prognostic scale like ours. With such  
32  
33 scorings health-care professionals might unconsciously associate the  
34  
35 patient's injury with a prognosis of the chronicity type and act accordingly to  
36  
37 some extent. The Quebec Task Force's WAD grading represented a first  
38  
39 attempt to better characterize and identify patients at risk for long-term  
40  
41 consequences after a whiplash injury. However, subsequent studies  
42  
43 demonstrated that the Quebec WAD grading was of little value in predicting  
44  
45  
46  
47  
48  
49  
50  
51  
52  
53  
54  
55  
56

57 *Page 18*  
58  
59  
60

*Stratification method for whiplash injuries*

1  
2  
3 long-term sequelae.<sup>9 32</sup> More recent prospective papers have stressed the  
4  
5 importance of emotional distress and social factors as a risk factors for  
6  
7 reduced recovery,<sup>33</sup> PTSD (post-traumatic stress disorder),<sup>15 33</sup>  
8  
9 catastrophizing,<sup>34</sup> kinesiophobia,<sup>28 31 35</sup> stress-response<sup>36</sup> are factors  
10  
11 associated with the risk of persistent complaints. A trajectory system has  
12  
13 been proposed by Sterling et al<sup>15</sup> including 4 groups from no pain/disability to  
14  
15 severe pain/disability, in accordance with post-traumatic stress, which needs  
16  
17 further validation. It is generally agreed upon, that there is a need for studies  
18  
19 confirming and validating prognostic models and a need for improved models  
20  
21 after acute WAD<sup>37</sup>. Other studies have found post-traumatic stress,<sup>15</sup> the  
22  
23 presence of sensitisation<sup>38</sup> and neck pain and headache intensities to be  
24  
25 predictive of chronic neck disability 1 year after injury.<sup>10 39</sup> These findings are  
26  
27 consistent with the present results. Expectations for recovery<sup>40</sup>, perceived  
28  
29 injustice after the accident<sup>41</sup>. Reduced Active neck mobility has been of  
30  
31 importance in some, but not a majority of prospective studies.<sup>42</sup> It is of  
32  
33 interest when the CROM test on its own reaches an area under the ROC  
34  
35 curve of 0.79 (CI95 0.75:0.85) (see Fig S1. B) in this multi-centre study in  
36  
37 prediction of **1-year work disability**. A critical view on design taking other risk  
38  
39 factors into account is however needed also for future prediction studies that  
40  
41 are highly needed in the whiplash area.<sup>37</sup>  
42  
43  
44  
45  
46  
47  
48  
49  
50  
51  
52  
53  
54

55 Conclusion

56  
57 *Page 19*  
58  
59  
60



*Stratification method for whiplash injuries*

1  
2  
3 The risk assessment score is applicable and inexpensive. Early identification  
4  
5 of whiplash-exposed persons at risk for chronic pain and work disability is  
6  
7 important for planning future treatment in scientific studies.  
8  
9

10  
11 More research is needed at present, but the risk stratification might have a  
12  
13 place in the clinic for individual guidance and management of the acute and  
14  
15 the sub-acute whiplash patient. Application of the risk assessment score may  
16  
17 be a valuable alternative to the present WAD grading system in predicting  
18  
19 work disability and pain and certain psychosocial parameters after neck  
20  
21 injury. Furthermore, a similar bio-psychosocial risk assessment could be  
22  
23 considered in other acute conditions bearing a risk of long-term development  
24  
25 of other chronic dysfunctional pain conditions.  
26  
27  
28  
29  
30  
31  
32  
33  
34  
35  
36  
37  
38  
39  
40  
41  
42  
43  
44  
45  
46  
47  
48  
49  
50  
51  
52  
53  
54  
55

56  
57 *Page 20*  
58  
59  
60

*Stratification method for whiplash injuries*

## Acknowledgements

Participants were recruited with the help of the staff at the emergency units at hospitals in the 4 former counties of Viborg, Aarhus, Vejle and Funen during the enrolment period. Statistical consulting was provided from Dept. of Statistics, University of Southern Denmark on designing the study. Financial support was provided by an unrestricted grant from The Danish Insurance Association.

*Stratification method for whiplash injuries*

## Legends

Figure 1. Flowchart for the Whiplash Study.

Figure 2a. Risk Strata and Number of Sick-Listed Days During First Year After Whiplash Injury

Figure 2b. One Year Recovery from Whiplash Injury in Risk Strata

Figure 3a-C. Initial Numeric Rating Of Work Related Issues in Risk Strata.

Figure 3 A. Expecting Problems Managing Ones Job/Education In 6 Weeks.

Figure 3b. Likelihood of Being Back to Work/Education in 6 Weeks

Figure 3c. Evaluation of the Physical Job Requirement of Current or Most Recent Job/Education

Figure 4. The Impact of Event Scale with Subscales of Intrusion and Avoidance Shown in Risk Strata.

Figure 5 A-E. Pressure Algometry in the Neck and Head and Remote from Injury in Risk Strata. PPT Pressure Pain Tolerance Threshold and PPDT Pressure Pain Detection Threshold (Kilo Pascal, Mean  $\pm$  SEM).

Figure S1 (Supplementary) ROC Curve of Individual Risk Factors

S1 A. Total Risk Score

S1 B. Initial CROM (Negativised Value of Total Cervical Range of Motion)

S1 C. Maximum of Initial VAS<sub>0-10</sub> For Neck Pain/Headache

S1 D. Initial Number of Non-Painful Symptoms

*Page 22*

*Stratification method for whiplash injuries*

Figure S2 (Supplementary) Initial Total Palpation Score in Risk Strata in  
Acute Whiplash Patients

For peer review only
