# Supplementary material for: A new stratified risk assessment tool for whiplash injuries developed from a prospective observational study
Source: HighWire-hosted journal article supplement (doi:10.1136/bmjopen-2012-002050), 2013-01-01
Supplement: bmjopen-2012-002050supp_figure1.pdf [file bmjopen-2012-002050supp_figure1.pdf]

Supplementary figure 1. Receiver Operating Characteristics (ROC) curve. One Year Disability

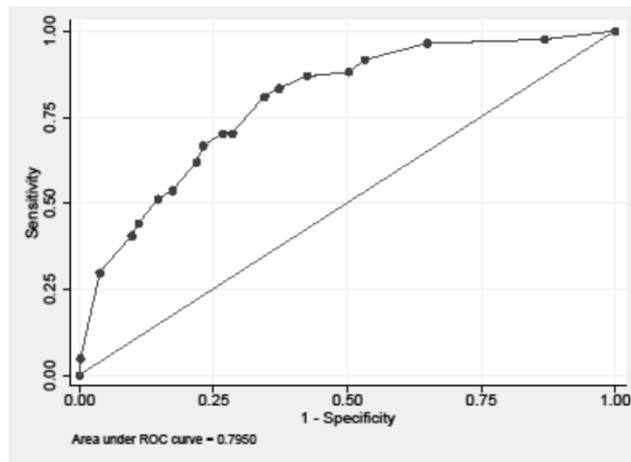

S1 A. Total Risk Score

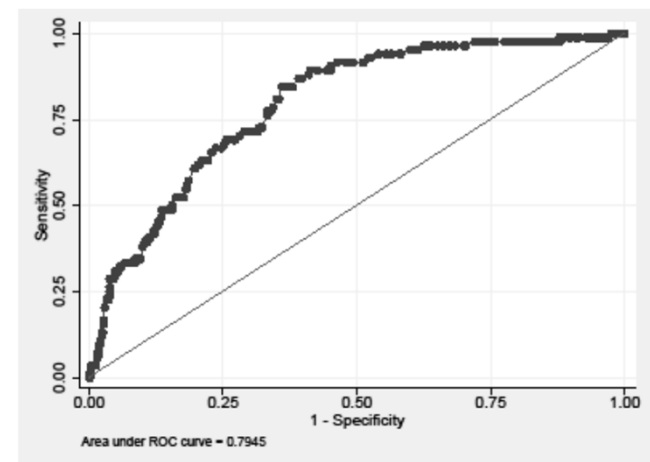

S1 B. CROM (negative)

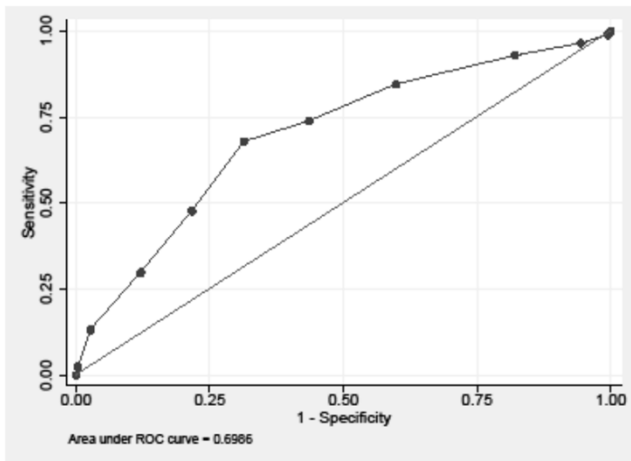

S1 C. Max VAS Neckpain/Headache

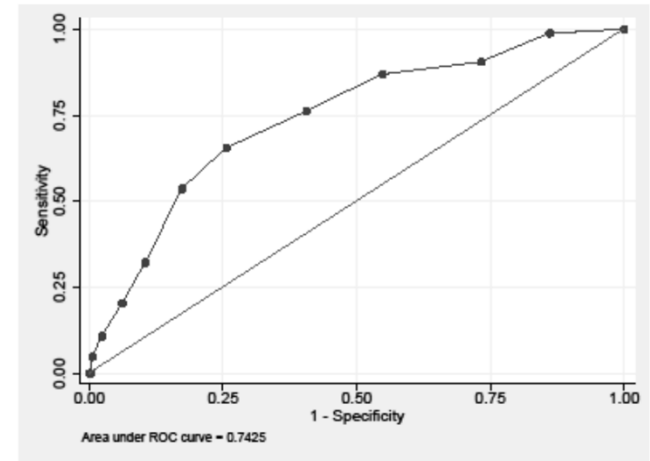

S1 D. Number of Non-Painful Symptoms
